# Supplementary material for: Phospholipase A2 Group IIA Is Associated with Inflammatory Hepatocellular Adenoma
Source: Cancers (Basel). 2023 Dec 28;16(1):159. doi: 10.3390/cancers16010159 (PMC10778238; doi:10.3390/cancers16010159)
Supplement: Supplementary file 1 [file cancers-16-00159-s001.zip]

Archive with 4 entries (4 files):
- Supplementary Figures.pdf
- Supplementary_Data_S1.xlsx
- Supplementary_Data_S2.xlsx
- Supplementary_Document.pdf
