# Supplementary material for: Phospholipase A2 Group IIA Is Associated with Inflammatory Hepatocellular Adenoma
Source: Cancers (Basel). 2023 Dec 28;16(1):159. doi: 10.3390/cancers16010159 (PMC10778238; doi:10.3390/cancers16010159)
Supplement: Supplementary file 1 [file cancers-16-00159-s001.zip › Supplementary_Data_S1.xlsx]

## Sheet: Supplemental data(TPM)
Gene	HCA1	HCA2	Normal liver1	Normal liver2	NBNC-HCC	HBV-HCC1	HBV-HCC2	HCV-HCC
5S_rRNA_1	0	0	0	0	0	0	0	0
5S_rRNA_2	0	0	0	0	0	0	0	0
5S_rRNA_3	0	0	0	0	0	0	0	0
5S_rRNA_4	0	0	0	0	0	0	0	0
5S_rRNA_5	0	0	0	0	0	0	0	0
5S_rRNA_6	0	0	0	0	0	0	0	0
5S_rRNA_7	0	0	0	0	0	0	0	0
7SK_1	0	0	0.0520476	0.396248	0.472891	0	4.10625	0.46273
7SK_2	0	0	0	0	0	0	0	0
7SK_3	0	0	0	0	0	0	0	0
7SK_4	0	0	0	0	0	0	0	0
7SK_5	0	0	0	0	0	0	0	0
7SK_6	0	0	0	0	0	0	0	0
7SK_7	0	0	0	0	0	0	0	0
A1BG	1030.75	164.219	992.114	799.216	212.303	7.1967	475.479	390.57
A1BG-AS1	2.52178	1.02478	1.02522	1.62892	0.151874	3.97009	5.4053	1.28796
A1CF	31.3083	6.48267	36.2292	26.7381	11.3964	1.33944	48.8492	16.1557
A2M	536.562	50.8447	1089.02	1423.24	146.422	150.139	1002.58	2144.95
A2M-AS1	6.3148	2.61748	3.15941	9.96799	1.81026	2.83929	1.28913	25.8957
A2ML1	0	0.0367428	0	0	0	0.121467	0.0124532	0
A2ML1-AS1	0	0	0	0	0	0	0	0
A2ML1-AS2	0	0	0	0	0	0	0	0
A2MP1	0.177932	1.11397	0.0133667	0.0814108	0.091085	0.031747	0.117173	0.138643
A3GALT2	0	0	0	0	0	0	0	0
A4GALT	2.67481	2.49216	0.846061	0.676328	0.576531	2.00946	3.67739	3.44754
A4GNT	0.311925	0	0	0	0	0	0.205411	0
AAAS	14.5848	33.8712	4.72358	5.97831	5.84302	8.25337	23.5387	17.81
AACS	0.214595	1.94577	0.185714	0.20619	0.123036	0.707573	1.35664	1.58803
AACSP1	0	0	0	0	0	0.0437026	0	0.32718
AADAC	102.171	19.519	456.828	603.869	123.084	7.9773	892.556	191.221
AADACL2	0	0	0	0	0	0	0	0
AADACL3	0	0	0	0	0	0	0	0
AADACL4	0	0	0	0	0	0	0	0
AADAT	3.75259	1.71027	15.0767	15.8342	1.0435	1.83506	19.8915	1.08296
AAED1	2.28383	1.65315	3.87542	5.87013	2.42993	20.7099	12.9459	7.14811
AAGAB	16.1416	53.5778	4.96952	7.24531	12.4684	12.4973	26.6218	11.1898
AAK1	0.370105	1.10262	0.137627	0.076202	0.18946	1.39664	2.39459	0.35842
AAMDC	31.6297	10.5878	14.4489	18.7809	8.15037	9.89191	12.8251	28.8153
AAMP	42.8054	85.7078	36.3648	38.173	25.8351	22.6766	101.183	67.4428
AANAT	0	0	0	0.0432797	0	0.472567	0	0
AAR2	9.93142	31.8722	12.8673	10.6367	11.8095	7.43759	32.4367	22.9032
AARD	0	0	0	0	0	0	0.113117	0.0764822
AARS	25.8831	63.5932	27.9553	22.1468	14.6801	24.4876	64.6002	48.3949
AARS2	2.15286	22.5379	1.20211	1.94064	2.10545	2.8895	15.3833	6.78154
AARSD1	8.76204	35.4009	5.84844	7.98384	5.4588	5.86754	18.7588	31.1526
AASDH	0.981575	7.62866	1.1396	1.79644	1.27904	3.15243	5.97426	2.48324
AASDHPPT	3.35043	40.809	7.63136	5.2427	5.60272	7.3648	15.4298	5.56438
AASS	12.3635	0.70137	3.9592	4.21164	1.75549	0.611865	27.8523	1.14518
AATF	14.703	86.0063	11.1159	11.6383	10.0515	24.3393	59.3622	69.0212
AATK	0.510266	0.287371	0.0899985	0.167487	0.11357	1.04502	1.9431	0.222259
AATK-AS1	0	0	0	0.0525694	0	0	0	0
AB015752.3	0	0	0.107697	0	0	0	0.472037	0
AB019438.66	0	0	0	0	0	0	0	0
AB019440.1	0	0	0	0	0	0	0	0
AB019440.50	0	0	0	0	0	0	0	0
AB019441.29	0	0	0	0	0	0	0	0
ABAT	62.0932	19.3685	70.2856	45.8933	47.2475	2.12422	55.1984	6.9481
ABC12-47043100G14.2	0	0	0	0	0	0	0	0
ABC7-42389800N19.1	13.8333	14.8171	3.28888	6.7292	6.30321	2.27831	35.4373	34.8746
ABC7-43041300I9.1	0	0	0	0	0	0	0	0
ABCA1	8.40796	3.04977	6.70204	5.53664	7.56179	51.6875	23.5177	10.5403
ABCA10	1.82387	0.0319253	0.229592	0.473631	0.168226	0	0.757431	0.0548706
ABCA11P	1.49892	8.69289	0.429938	0.74816	0.0697554	2.33403	2.01902	1.95669
ABCA12	0	0	0	0	0	0	0	0
ABCA13	0.0743297	0	0.0368535	0.015304	0.11415	0.0716154	0.792961	0
ABCA17P	0	0	0	0	0	0.112448	0.0415025	0
ABCA2	7.89649	12.4357	0.968245	2.42969	8.30575	3.19896	18.9431	4.02357
ABCA3	0.725563	0.0458453	0.0398827	0.121454	0.326127	0.738851	1.88791	0.177289
ABCA4	0.159309	0.0619062	0.0359032	0.043734	0.163103	0	1.17498	0.159599
ABCA5	5.85536	1.20971	2.99397	3.09676	3.5131	1.51654	10.2894	1.98338
ABCA6	10.0717	0.960745	13.078	11.8487	3.37724	0.240298	44.4478	0.44323
ABCA7	2.41043	2.30962	0.18604	0.419241	0.726833	3.60557	14.6774	3.6057
ABCA8	17.6875	0.24555	4.19798	9.12981	2.24462	0.123529	31.7952	6.7268
ABCA9	3.11298	0.283825	0.524474	0.76747	0.618861	0.517679	6.28928	0
ABCA9-AS1	0	0	0	0	0	0	0	0
ABCB1	3.80584	1.73991	8.91353	14.0501	8.42967	2.68956	20.0173	8.38976
ABCB10	8.0799	128.198	5.32392	6.9038	9.13614	4.16859	19.638	6.32832
ABCB10P1	0	0	0	0	0	0	0	0
ABCB10P3	0	0	0	0	0	0	0	0
ABCB10P4	0	0	0	0	0	0	0	0
ABCB11	10.7245	2.72621	7.38383	6.20107	2.00384	0.0861072	65.2034	1.55788
ABCB4	17.5073	5.8961	18.9637	30.3294	37.9995	1.22317	28.8711	6.25255
ABCB5	0	0	0	0	0	0.191655	0.00982454	0.398563
ABCB6	13.1339	2.16522	4.13797	5.66328	2.22754	3.43696	69.7863	23.5511
ABCB7	9.06327	36.2663	7.13246	13.1801	6.57065	10.9088	24.6157	14.9857
ABCB8	5.36803	4.88452	2.11296	4.34382	9.85627	1.56727	10.2155	7.14078
ABCB9	0.233052	0.370483	0.0334235	0.0145405	0.0108456	0.022681	0.244159	0.176876
ABCC1	2.98999	20.7935	0.386231	0.58809	0.447982	8.23644	19.2457	1.77778
ABCC10	0.820119	10.8887	0.154024	0.234523	0.55977	2.35954	9.18122	2.24802
ABCC11	0	0.0123439	0.31786	0.19621	0.253675	0	1.44339	0.114565
ABCC12	0	0	0	0	0	0	0.0243953	0
ABCC13	0	0.00834211	0	0	0	0	0	0
ABCC2	15.4459	4.765	11.5868	17.2774	10.9812	0.664263	135.572	10.0052
ABCC3	21.8338	5.01401	4.48446	11.9988	11.0869	15.5997	128.656	2.54257
ABCC4	0.239527	22.9816	0.354739	0.446201	2.03193	1.28211	10.7148	1.39407
ABCC5	2.28142	11.4766	0.244839	0.323094	1.11227	3.87674	25.93	3.25705
ABCC5-AS1	0	0	0	0	0	0	0.193914	0
ABCC6	43.4831	5.40759	15.6466	21.3038	15.5068	1.66251	29.1041	19.1943
ABCC6P1	45.5653	3.46723	8.52725	12.5143	11.2506	2.06838	19.8008	19.383
ABCC6P2	6.72752	2.5485	2.97513	4.61717	13.9055	0	5.01539	10.258
ABCC8	0	0	0.0364295	0	0	0	0.0266118	0
ABCC9	6.61442	0.642187	4.67099	3.56026	5.37301	0.258902	11.7534	0.064609
ABCD1	5.77475	18.4255	2.77936	2.28392	12.025	6.91555	12.9125	10.895
ABCD1P2	0	0	0	0.0592021	0	0	0	0.460899
ABCD1P3	0	0	0	0	0	0	0	0
ABCD1P4	0	0	0	0	0	0	0	0
ABCD1P5	0	0	0	0	0	0	0	0
ABCD2	0.110696	0.0430158	0	0.0455831	0.0453332	0.26071	2.36185	0.133077
ABCD3	13.0199	24.6441	27.2486	26.288	19.193	4.60754	24.9511	21.3846
ABCD4	6.59891	4.88582	3.71974	5.90162	1.75755	7.28355	15.0073	7.20523
ABCE1	5.24643	128.348	9.32989	8.92605	4.80718	10.5486	24.9393	6.27185
ABCF1	22.4729	88.139	10.8726	11.7352	8.5343	19.8087	62.6949	55.6932
ABCF2	5.52667	60.3667	4.43636	4.85846	11.6027	7.14633	26.2328	12.6702
ABCF2P1	0	0	0	0	0	0	0	0
ABCF2P2	0	0	0	0	0	0	0	0
ABCF3	9.7339	25.8696	8.10539	7.90006	8.33648	10.5341	42.984	18.5644
ABCG1	2.86403	0.481982	2.75465	2.30611	1.80091	37.1064	18.1773	3.64492
ABCG2	8.14726	0.221396	19.6839	21.154	7.26221	0.853896	32.0787	1.40792
ABCG4	0.462699	0	0	0.045365	0	0.0707623	0.101567	0.0147156
ABCG5	43.399	9.2089	13.5375	18.4469	3.34481	1.55	26.2325	19.6377
ABCG8	54.7755	8.62557	27.0018	17.6406	4.66893	0.887631	31.1912	30.6997
ABHD1	3.15953	1.29239	0.787012	0.913017	4.42655	0	0.60229	0.555313
ABHD10	23.8175	44.1447	17.4116	22.9662	26.2101	8.3197	19.1465	22.5022
ABHD11	5.61107	10.863	3.94325	6.54244	15.6899	2.00228	18.8725	9.38896
ABHD12	33.1467	19.0157	13.8694	18.0222	27.5861	46.2207	70.2582	50.463
ABHD12B	0.65261	0.100635	0.0420222	0.0213282	0	0	0.102324	0
ABHD13	3.00115	23.2575	6.51876	6.85389	3.12561	5.3178	10.1202	2.97206
ABHD14A	17.8836	9.21945	10.8915	10.4265	7.71576	3.5857	11.0679	30.0002
ABHD14A-ACY1	0	0.206664	0.0287657	0.0875994	0	0	2.01728	0
ABHD14B	167.989	68.8445	77.8259	79.88	96.7976	18.662	123.457	35.2492
ABHD15	20.6465	5.95132	17.5205	11.5576	14.3284	7.28528	26.9394	6.72779
ABHD16A	13.1687	19.9004	9.36807	13.1459	14.2314	9.36275	64.8862	21.1438
ABHD16B	4.6657	0.805803	0.490701	0.960634	1.11459	2.58065	3.37974	6.90742
ABHD17A	18.177	23.472	3.70107	6.65439	5.52771	11.6321	30.6214	22.1166
ABHD17AP1	0.147864	0.383058	0	0	0.151386	0	0	0
ABHD17AP2	0.148022	2.49255	0	0	0	0	0	0
ABHD17AP3	0.121464	0.0786668	0	0	0	0	0	0.0811236
ABHD17AP4	0	0	0	0	0.311099	0	0.300151	0
ABHD17AP5	0	7.85121	0	0	0	0	0	0
ABHD17AP6	0	0	0.0596254	0	0	0	0.174226	0
ABHD17B	4.99398	15.4766	4.88062	5.34934	5.16072	4.24701	24.8956	4.48875
ABHD17C	4.56922	9.02579	3.00346	2.71778	11.1104	0.733727	4.76419	1.70386
ABHD2	22.6948	26.1372	29.6232	18.9107	28.7162	15.6921	108.291	6.49987
ABHD3	5.02946	12.4148	7.58507	8.9225	3.14138	8.29644	26.0797	12.7603
ABHD4	10.4121	12.4826	4.89284	5.38226	9.57145	13.281	43.4451	13.553
ABHD5	3.43955	7.72626	4.49401	4.06382	5.25994	9.64821	14.4504	1.2213
ABHD6	33.4391	13.4328	24.0393	20.0974	19.3831	3.95464	22.8315	10.0487
ABHD8	12.1857	4.61386	6.67556	9.09226	11.3883	4.6829	15.5966	18.9483
ABI1	8.11805	31.7573	7.20066	8.05518	9.44631	40.4517	68.467	11.4317
ABI2	3.36638	2.88902	0.683612	0.583717	0.791613	1.63	3.27045	1.60085
ABI3	12.5959	2.07586	3.57374	4.82403	4.20268	13.1833	49.25	9.57677
ABI3BP	1.44671	0.47256	0.856221	1.08787	0.167437	5.09071	0.405934	0.0672162
ABL1	4.73112	18.9834	1.56713	1.55555	5.15922	7.56191	22.1713	2.10165
ABL2	1.00008	9.92474	0.539988	0.586269	0.991904	4.04828	5.61851	1.71854
ABLIM1	9.31797	24.1574	2.65493	1.70918	5.93022	2.9057	17.7359	4.51329
ABLIM2	0.548034	0.62114	0.102925	0.36045	0.467574	0.562245	0.466157	0.259265
ABLIM3	26.0095	4.82175	12.3618	6.83023	20.829	8.03155	83.5224	6.10997
ABO	0.413813	0	0.0196338	0.0298951	0.0668953	0.0466318	0.372905	0
ABR	1.65126	14.1626	0.467837	0.420932	0.652087	10.316	18.0975	1.20526
ABRA	0	0	0	0	0	0	0	0
ABRACL	13.9256	154.738	19.1934	24.1696	8.71931	55.9351	41.9866	18.6781
ABT1	11.4526	42.3223	12.6706	15.8041	10.4086	19.2101	36.2977	42.7851
ABT1P1	0	0	0	0	0	0	0	0
ABTB1	11.3105	3.77892	2.67041	4.82076	4.84794	12.805	18.1478	11.6458
ABTB2	4.24895	3.25546	2.15299	1.77253	4.49232	0.237838	10.4241	0.259667
AC000003.1	0	0	0	0	0	0	0	0
AC000003.2	0	0	0	0	0	0	0	0
AC000029.1	0	0	0	0	0	0	0	0
AC000032.2	5.0629	0.728669	0	0.965199	0	0	0	2.62999
AC000036.4	0	0	0	0	0	0	0	0
AC000041.8	0	0	0	0	0	0	0	0
AC000067.1	0	0	0	0	0	0	0.316884	0
AC000068.10	0	0	0	0	0	0	0	0
AC000068.5	0	0.213267	0.0593695	0	0.202281	0	0.477064	0
AC000068.9	0	0	0	0	0	0	0	0
AC000077.2	0	0	0	0	0	0	0	0
AC000078.5	0	0	0	0	0	0	0	0
AC000081.2	0	0	0	0	0	0	0	0
AC000089.3	0	0	0	0	0	0	0	0
AC000095.9	0	0	0	0	0	0	0	0
AC000099.1	0	0	0	0	0	0	0	0
AC000110.1	0	0	0	0	0	0	0	0
AC000111.3	0	0	0	0	0	0	0	0
AC000111.4	0	0	0	0	0	0	0	0
AC000111.5	0	0	0	0	0	0	0	0
AC000111.6	0	0	0	0	0	0	0	0
AC000120.7	5.12786	0.281448	0	0	0	0.186087	0.286173	0
AC000123.4	0	2.77346	0.603187	0.734749	0.27402	1.43262	0.528755	0
AC000124.1	0	0	0	0	0	0	0	0
AC000362.1	0	0	0	0	0	0	0	0
AC000367.1	0	0	0	0	0	0	0	0
AC000370.2	0	0	0	0	0	0	0	0
AC000374.1	0	0	0	0	0	0	0	0
AC000403.1	0	0	0	0	0	0	0	0
AC002044.4	0	0	0	0	0	0	0	0
AC002056.3	0	0	0.0816915	0	0	0	0	0.121047
AC002056.5	0	0	0	0	0	0	0	0
AC002059.10	0	0	0	0	0	0	0	0
AC002064.4	0	0	0	0	0	0	0	0
AC002064.5	0	0	0	0	0	0	0	0
AC002066.1	0	0	0.102636	0.078139	0.233132	0	0.0749759	0
AC002066.2	0	0	0	0	0	0	0	0
AC002069.5	0	0	0	0	0	0	0	0
AC002069.6	0	0	0	0	0	0	0	0
AC002070.1	0	0	0	0	0	0	0	0
AC002075.3	0	0	0	0	0	0	0	0
AC002075.4	0	0	0	0	0	0	0	0
AC002076.10	0	0	0.236239	0.179853	0	0	0	0
AC002115.5	0	0	0	0	0	0	0	0
AC002115.9	0	0	0	0	0	0	0	0
AC002116.7	2.3626	2.64298	0.0968102	0.147407	0.439796	0	0.14144	1.29104
AC002116.8	0	0	0	0	0.750766	0	0.563381	2.44878
AC002117.1	2.38111	0	0.0894381	0	0.406305	0	0.130669	0
AC002127.2	0	0	0	0	0	0	0	0
AC002127.4	0	0	0	0	0	0	0	0
AC002128.5	0	0	0	0	0	0	0.147162	0
AC002306.1	0	0	0	0	0	0	0.194121	0
AC002310.10	0	0	0	0	0	0	0	0
AC002310.12	0.377955	1.8114	0.442932	1.29697	0.0773915	1.13292	0.896018	3.78643
AC002310.13	0	0	0	0	0	0	0	0
AC002310.17	0	0	0	0	0	0	0	0
AC002310.7	0	0.23317	0	0.0494174	0	0.0770834	0.142251	0
AC002314.4	0	0	0	0	0	0	0	0
AC002331.1	0	0	0	1.28956	1.4428	6.53741	2.47472	0
AC002365.1	0	0	0	0.147636	0	0	0	0
AC002366.3	0	0	0	0	0	0	0	0
AC002368.4	0	0	0	0	0	0	0	0
AC002383.2	0	0	0	0	0	0	0	0
AC002386.1	0	0	0	0	0	0	0	0
AC002395.1	0	0	0	0	0	0	0	0
AC002398.11	2.09865	1.09613	0.213599	0.418158	0.76242	1.15958	0.891626	0.859075
AC002398.12	122.829	75.4854	0	0	2.35657	2.4641	0.82678	7.12744
AC002398.13	2.58744	4.81783	0.145782	0.221973	0.662268	1.73122	0.851951	1.94412
AC002398.5	0.943641	0	0	0.0761918	0	0.0594236	0.548307	0.185365
AC002398.9	3.19625	6.12395	3.18148	4.93564	12.4078	0	15.1723	34.2444
AC002400.1	0	0	0	0	0	0	0	0
AC002401.1	0	0	0	0	0	0	0	0
AC002429.4	0	0	0	0	0	0	0	0
AC002429.5	0	0	0	0	0	0	0	0
AC002451.1	0	0	0	0	0	0	0	0
AC002451.3	3.44269	0	0.358095	0.636125	0.948955	0.850504	0.95916	3.89113
AC002454.1	0	0	0	0	0	0.221658	0.954454	2.21259
AC002456.2	0	2.61363	0.30316	1.69255	0.918145	0	2.95279	0.598945
AC002463.3	0	0	0	0	0	0	0	0
AC002465.2	0	0	0	0	0	0	0	0
AC002467.7	0.982452	3.18145	1.26522	1.54118	2.01171	1.65275	4.99093	4.87434
AC002472.1	0	0	0	0	0	0	0	0
AC002472.11	0	0	0	0	0	0	0	0
AC002472.13	0	0	0	0	0	0	0	0
AC002477.1	0	0	0	0	0	0	0	0
AC002480.2	0	0	0	0	0	0	0	0
AC002480.3	0.283932	0	0	0.0779462	0.0581391	0	0.112186	0.0758532
AC002480.4	2.72738	0	0	0	0	0	0	0
AC002480.5	0	0.0697692	0	0	0	0.922596	0	0
AC002485.1	0	0	0	0	0	0	0	0
AC002486.2	0	0	0	0	0	0	0	0
AC002486.3	0	0	0	0	0	0	0	0
AC002511.1	0	0	0	0	0	0	0	0.112293
AC002511.2	0	0	0	0	0	0	0	0
AC002511.3	0	0	0	0	0	0	0	0
AC002519.6	0	0	0	0	0	0	0	0
AC002519.8	0	0	0	0	0	0	0	0
AC002523.1	0	0	0	0	0	0	0	0
AC002539.1	0	0	0	0	0	0	0	0
AC002539.2	0	0	0	0	0	0	0	0
AC002542.2	0	0	0	0	0	0	0	0
AC002543.2	0	0	0	0	0	0	0	0
AC002550.5	0	0	0	0	0	0.321637	0	0
AC002551.1	0	0	0	0	0	0	0	0
AC002553.1	0	0	0	0	0	0	0	0
AC002553.4	0	0	0	0	0	0	0	0
AC002558.1	0	0	0	0	0	0	0	0
AC002978.1	0	0	0	0	0	0	0	0
AC002979.1	0	0	0	0	0	0	0	0
AC002981.1	0	0	0	0	0	0	0	0
AC002984.2	0	0	0	0	0	0	0	0
AC002985.3	0	0.130575	0	0	0	0	0	0.40396
AC002992.1	0	0	0	0	0	0	0	0
AC002994.1	0	0	0	0	0	0	0	0
AC003001.1	0	0	0	0	0	0	0	0
AC003002.4	0	0	0	0	0	0	0	0
AC003002.6	0	0.221762	0	0	0	0	0.0751618	0
AC003003.5	0	0	0	0.0398079	0	1.11769	0.152786	0
AC003005.2	0	0.134705	0	0	0	0	0	0
AC003005.4	0	0.296664	0	0	0	0	0	0
AC003006.1	0	0	0	0	0	0	0	0
AC003006.7	0	0	0	0	0	0	0.327536	0
AC003009.1	0	0	0	0	0	0	0	0
AC003009.2	0	0	0	0	0	0	0	0
AC003029.1	0	0	0	0	0	0	0	0
AC003035.1	0	0	0	0	0	0	0	0
AC003043.1	0	0	0	0	0	0	0	0
AC003045.1	0	0	0	0	0	0	0	0
AC003051.1	0	0	0	0	0	0	0	0
AC003075.4	1.89067	1.44714	1.43324	1.47453	1.3198	0.552007	0.622529	0.516576
AC003079.1	0	0	0	0	0	0	0	0
AC003080.4	0	0	0	0	0	0	0	0
AC003084.2	0	0	0	0	0	0	0	0
AC003088.1	0	0	0	0	0	0	0	0
AC003090.1	0	0.210953	0.0209734	0.0638697	0	0	0.0919264	0
AC003092.1	0	0	0	0	0	2.22325	0	0
AC003092.2	0	0	0	0	0	0	0	0
AC003101.1	0	0	0	0	0	0	0	0
AC003102.1	0	0	0	0	0	0.206345	0.126931	1.09423
AC003102.3	0	0.0662181	0.0115212	0	0	0	0	0
AC003104.1	0	0.395188	0	0	0	0.870963	0.133941	0
AC003658.1	0	0	0	0	0	0	0	0
AC003664.1	0	0	0	0	0	0	0	0
AC003665.1	0.163696	0.530092	0.59027	0.449384	0.44692	0.817797	1.25765	1.20262
AC003666.1	0	0	0	0	0	0	0	0
AC003681.1	0	0	0	0	0	0	0	0
AC003682.16	1.79357	0.580806	0	0	0	0	0	0
AC003682.17	0	0	0	0	0	0	0	0
AC003956.1	0	0	0	0	0.397175	0	0	0
AC003958.2	0	0	0	0	0	0	0	0
AC003958.6	0	0	0	0	0	0	0	0
AC003968.1	0	0	0	0	0	0	0	0
AC003973.1	0	0	0	0	0	0	0	0
AC003973.4	0	0	0	0	0	0	0	0
AC003973.5	0	0	0	0	0	0	0	0
AC003973.6	0	0	0	0	0	0	0	0
AC003984.1	0	0	0	0	0	0	0	0
AC003985.1	0	0	0	0	0	0	0	0
AC003986.5	0	0	0	0	0	0	0	0
AC003986.6	0	0	0	0	0	0	0	0
AC003986.7	0	0	0	0	0	0	0	0
AC003988.1	0	0	0	0	0	0	0	0
AC003989.3	0	0	0	0	0	0	0	0
AC003989.4	0	0	0	0	0	0	0	0
AC003991.3	0	0.0316616	0	0	0.350358	0	0	0
AC004000.1	0	0	0	0	0	0	0	0
AC004004.2	0	0	0	0	0	0	0	0
AC004006.2	0	0	0	0	0	0	0	0
AC004009.3	0	0	0	0	0	0	0	0
AC004012.1	0	0	0.466284	0.709982	0.529567	0	0	0.690917
AC004014.3	0	0	0	0	0	0	0	0
AC004014.4	0	0	0	0	0	0	0	0
AC004016.1	0	0	0	0	0	0	0	0
AC004016.2	0	0	0	0	0	0	0	0
AC004017.1	0	0	0	0	0	0	0	0
AC004019.10	0	0	0	0	0	0	0	0
AC004019.13	1.20222	0.437975	0	0	0.230785	0	0.0989617	0
AC004019.18	0	0	0	0	0	0	0	0
AC004022.7	0	0	0	0	0	0	0	0
AC004022.8	0	0	0	0	0	0	0	0
AC004041.2	0	0.082742	0	0.0876804	0.1308	0	0.168262	0
AC004051.2	0	0	0	0	0	0	0	0
AC004052.1	0	0	0	0	0	0	0	0
AC004053.1	0	0	0	0	0	0	0	0
AC004054.1	0	0	0	0	0	0	0	0
AC004057.1	0.486284	0	0	0	0	0	0	0
AC004062.2	0	0	0	0	0	0	0	0
AC004063.1	0	0	0	0	0	0	0	0
AC004066.2	0	0	0	0	0	0	0	0
AC004066.3	0	0	0	0	0	0	0	0
AC004067.5	0	0	0	0	0	0	0	0
AC004069.1	0	0	0	0	0	0	0	0
AC004069.2	0.251557	1.30338	0	0	0	1.3465	0	0
AC004070.1	0	0	0	0	0	0	0	0
AC004074.3	0	0	0	0	0	0	0	0
AC004074.4	0	0	0	0	0	0	0	0
AC004076.7	0	1.37342	0	0	0	0	0	0
AC004076.9	0	0.261024	0.0605534	0	0	0	0.0884687	0
AC004079.1	0	0	0	0	0	0	0	0
AC004112.4	0	0	0	0	0	0	0	0
AC004112.5	0	0	0	0	0	0	0	0
AC004112.7	0	0	0	0	0	0	0	0
AC004125.3	0	0	0	0	0	0	0	0
AC004129.7	0	0	0	0	0	0	0	0
AC004129.9	0	0	0	0	0	0	0	0
AC004156.3	0	0.0475261	0	0	0	0.157116	0.048324	0
AC004158.2	0	0.555554	0	0	0	0	0.154058	0
AC004158.3	0	0	0	0	0	0	0	0
AC004159.1	0	0	0	0	0	0	0	0
AC004160.4	3.67952	0.953223	0.331699	0.841763	0	0	0	0
AC004166.6	0	0.233764	0.0610084	0.0928937	0	0	0.0594223	0
AC004221.2	0	0	0	0	0	0	0	0
AC004231.2	0	0	0	0	0	0	0.11159	0
AC004237.1	0	0	0	0	0	0	0	0
AC004257.1	0	0	0	0	0	0	0	0
AC004257.3	0	0	0	0	0	0	0	0
AC004381.6	0.638285	7.15814	0.423977	0.438061	0.378335	0.251745	2.43348	4.26298
AC004381.7	0	0.254827	0	0	0	0	0	0
AC004383.3	0	0	0	0	0	0	0	0
AC004386.3	0	0	0	0	0	0	0	0
AC004386.4	0	0	0	0	0	0	0	0
AC004410.3	0	1.60541	0	0	0	0	0.233194	0
AC004447.2	9.54614	33.7267	1.05638	1.29463	4.8575	14.1359	15.6595	10.1171
AC004448.2	0	0	0	0	0	0	0	0
AC004448.5	0	0	0	0	0	0	0.0307873	0
AC004449.6	0	0	0	0	0	0	0	0
AC004453.8	0	0	0	0	0	0	0	0
AC004458.1	0	0	0	0	0	0	0	0
AC004460.1	0	0	0	0	0	0	0	0
AC004461.4	0	0	0	0	0	0	0	0
AC004463.6	0	0	0	0	0	0	0	0
AC004466.1	0	1.07465	0.0575314	0	0	2.45955	1.2608	0.340989
AC004471.10	0	0	0	0.0626041	0	0	0.18021	0
AC004471.9	0	1.22947	0	0.162857	0	0	0.781321	0
AC004485.3	0	0	0	0	0	0	0.172573	0
AC004490.1	0	0.130671	0	0	0	0	0.0664323	0
AC004492.1	0	0	0	0	0	0	0	0
AC004510.3	0	0	0	0	0	0	0	0
AC004520.1	0	0	0	0	0	0	0	0
AC004528.1	0	0	0	0	0	0	0	0
AC004528.4	0	0	0	0	0	0	0	0
AC004535.2	0	0	0	0	0	0	0	0
AC004538.3	2.03227	0.445188	0.30983	0.389714	0	0.0639887	0.137767	0
AC004540.4	2.03556	2.33244	4.09347	7.84482	0.320622	0	0	0
AC004540.5	0	0.0646428	0.0149961	0.0228337	0.0340627	0	0.284822	0.199985
AC004543.1	0	0	0	0	0	0	0	0
AC004543.2	0	0	0	0	0	0	0	0
AC004549.6	0	0.312378	0	0	0	0	0.105874	0
AC004552.1	0	0	0	0	0	0	0	0
AC004562.1	0	0	0	0	0	0	0	0
AC004593.3	0	0	0	0	0.531557	0	0.911737	0.577929
AC004595.1	0	0	0	0	0	0	0	0
AC004603.4	0	0	0	0	0	0	0	0
AC004623.2	25.3914	0	0	0	0	0.662987	0	0
AC004637.1	0	0	0	0	0	0	0	0
AC004655.1	0	0	0	0	0	0	0	0
AC004656.1	0	0	0	0	0	0	0	0
AC004673.1	0	0	0	0	0	0	0	0
AC004691.5	0	0	0	0	0	0	0	0
AC004692.4	0	0	0	0	0	0	0	0
AC004692.5	0	0	0	0	0	0	0	0
AC004699.1	0	0	0	0	0	0	0	0
AC004702.2	0	0	0	0	0	0	0	0
AC004706.1	2.48358	0.402125	0.879561	1.461	0	1.13947	2.1612	2.96203
AC004744.3	0	0	0	0	0	0	0	0
AC004745.1	0	0	0	0	0	0	0	0
AC004769.1	0	0	0	0	0	0	0	0
AC004771.1	0	0.401095	0	0	0	0	0.9516	0
AC004775.5	0	0	0	0	0	0	0	0
AC004791.2	0	0	0.121107	0	0	0	0	0
AC004797.1	0	0	0	0	0	0	0	0
AC004812.1	0	0	0	0	0	0	0	0
AC004817.1	0	0	0	0	0	0	0	0
AC004824.1	0	0	0	0	0	0	0	0
AC004824.2	0	0	0	0	0	0	0	0
AC004832.1	0	0.38388	0	0.135597	0	0	0.910759	0
AC004837.3	0	0	0	0	0	0	0	0
AC004837.4	0	0	0	0	0	0	0	0
AC004837.5	0	0	0	0	0	0.202252	0.248826	1.2618
AC004840.8	0	0	0	0	0	0	0	0
AC004840.9	0.267256	4.15415	0.0903468	0.0917103	0.0684056	0	1.84796	0
AC004851.1	0	0	0	0	0	0	0	0
AC004854.4	0	0	0	0	0	0	0	0
AC004854.5	0	0	0	0	0	0	0	0
AC004862.6	9.72208	1.35873	6.7346	7.58541	6.44368	0.109556	3.80766	0.205048
AC004866.1	0	0	0	0	0	0	0	0
AC004866.3	0	0	0	0	0	0	0	0
AC004869.2	0	0	0	0	0	0	0	0
AC004869.3	0	0	0	0	0	0	0	0
AC004870.3	0	0	0	0	0	0	0	0
AC004870.4	0	0	0	0	0	0	0	0
AC004870.5	0	0	0	0	0	0	0	0
AC004875.1	0	0	0	0	0	0	0	0
AC004878.2	0	0	0	0	0	0	0	0
AC004878.3	1.4692	4.22904	0	1.90461	2.84126	0	0.430004	6.54167
AC004878.5	0	0	0	0	0	0	0	0
AC004878.6	0	0	0	0	0	0	0.132671	0
AC004878.7	0	0	0	0	0	0	0	0
AC004878.8	0	0	0	0	0	0	0	0
AC004889.1	0	0	0	0	0	0	0	0
AC004893.10	0	0	0	0	0	0	0	0
AC004893.11	0.263433	0.917048	0.118739	0.225996	0.235994	0.705036	1.01918	0.351884
AC004895.1	0	0	0	0	0	0	0	0
AC004895.4	0	0	0.0759133	0	0	0	0	0
AC004899.1	0	0	0	0	0	0	0	0
AC004899.3	0	0	0	0	0	0	0.0530606	0
AC004901.1	0	0	0	0	0	0	0	0
AC004906.3	0	0	0	0	0	0	0.0938553	0
AC004911.2	0	0	0	0	0	0	0	0
AC004917.1	0	0	0	0	0	0	0	0
AC004920.2	0	0	0	0	0	0	0	0
AC004920.3	0	0	0	0	0	0	0	0
AC004924.1	0	0	0	0	0	0	0	0
AC004938.5	0	0	0	0	0	0	0	0
AC004941.3	0	0	0.0199516	0	0	0.0473865	0	0
AC004941.5	0	0	0	0	0	0	0	0
AC004943.1	0	0	0	0	0	0	0	0
AC004945.1	0	0	0	0	0	0	0	0
AC004947.2	0.446941	0.0321626	0	0	0	0	0.0327026	0
AC004951.5	0	0.11322	0.157592	0.359934	0.894901	0.935734	1.49658	0
AC004951.6	0.0740111	1.00661	0	0	0.151548	0.0792315	0.243692	0.692028
AC004967.7	0	2.80138	0.557037	1.27225	3.16318	1.65376	1.62767	3.71426
AC004969.1	0	0	0	0	0	0	0	0
AC004980.1	0	0	0	0	0	0	0	0
AC004980.10	0	0	0	0	0	0	0	0
AC004980.11	0	0.389226	0	0	0	0	0	0
AC004980.7	0.488473	3.5375	0.380299	0.548581	0.818359	0.237695	2.07625	1.03804
AC004980.8	0	0	0	0	0	0	0	0
AC004980.9	0	0.245052	0.170545	0.259678	0	0	0.249167	0
AC004985.12	0.354114	0.152896	0.0532042	0	0.12085	0.126364	0.155463	0
AC004987.10	0	0	0	0	0	0	0	0
AC004987.9	0.159566	0.103344	0.0719225	0.054756	0	0	0.157618	0
AC004988.1	0	0	0	0	0	2.67141	0.256764	0.104164
AC005000.1	0	0	0	0	0	0	0	0
AC005000.2	0	0	0	0	0	0	0	0
AC005003.1	0	1.09564	0	0	0.0787273	0.164639	1.21531	0
AC005007.3	0	0	0	0	0	0	0	0
AC005008.2	0	0	0	0	0	0	0	0
AC005008.3	0	0	0	0	0	0	0	0
AC005009.1	0	0	0	0	0	0	0	0
AC005009.2	0	0	0	0	0	0	0	0
AC005013.1	0.546949	0.0531351	0.221877	0.112613	0.419983	0.175659	0.306154	0.219178
AC005013.5	0	0	0	0	0	0	0	0
AC005014.5	0	0	0	0	0	0	0	0
AC005017.2	0	0	0	0	0	0	0	0
AC005019.2	0	0	0	0	0	0	0	0
AC005019.3	0	0	0	0	0	0	0	0
AC005020.1	0	0	0	0	0	0	0	0
AC005022.1	0	0	0	0	0	0	0.0745457	0
AC005027.3	0	0	0	0	0	0	0	0
AC005029.1	0	0	0	0	0	0	0	0
AC005033.6	0	0	0	0	0	0	0	0
AC005034.2	0	0	0	0	0	0	0	0
AC005034.3	0	0	0	0	0	0	0	0
AC005037.1	0	0	0	0	0	0	0	0
AC005037.2	0	0	0	0	0	0	0	0
AC005037.3	0	0	0	0	0	0	0.186939	0.663579
AC005037.4	0	0	0	0	0	0	0	0
AC005037.6	0	0	0	0	0	0	0	0
AC005040.3	0	0	0	0	0	0	0	0
AC005041.11	0	0	0	0	0	0	0	0
AC005041.17	0	0.434195	0.15109	0	0.34319	0	0.662227	1.11939
AC005042.2	0	0	0	0	0	0	0	0
AC005042.3	0	0	0	0	0	0	0	0
AC005042.4	0.177932	0.460953	0.0133667	0.0203527	0	0.031747	0.0781154	0
AC005042.5	0	0	0	0	0	0	0	0
AC005048.1	0	0	0	0	0	0	0	0
AC005062.2	0	0.244192	0	0	0	0	0	0
AC005071.1	0	0	0	0	0	0	0	0
AC005076.5	3.11047	2.31668	0.2103	0.640423	2.8661	0.998959	1.33141	4.15484
AC005077.12	1.39391	0.104166	0.024165	0.0367945	0.0548891	0	0.247135	0
AC005077.14	0	0	0	0	0	0	0	0
AC005077.5	0	0	0	0	0	0	0	0
AC005077.7	0.875465	0.708749	0	0.30042	0.896319	0	0	0
AC005077.8	0	0	0	0	0	0	0	0
AC005077.9	0	0	0	0	0	0	0	0
AC005082.1	0	0	0	0	0	0	0	0
AC005082.12	0	0	0	0	0	0	0	0
AC005083.1	0	1.09199	0.345444	0.210394	0.313861	1.805	1.11033	0
AC005086.1	0	0	0	0	0	0	0	0
AC005086.2	0	0	0	0	0	0	0	0
AC005086.3	0	0	0	0	0	0	0	0
AC005086.4	0	0	0	0	0	0	0	0
AC005088.1	0	0	0	0	0	0	0	0
AC005094.2	0	0	0	0	0	0	0	0
AC005102.1	0	0	0	0	0	0	0	0
AC005104.3	0	2.42835	0	0	0	1.33797	1.23456	0
AC005105.2	0	0	0	0	0	0	0	0
AC005150.1	0	0	0	0	0	0	4.05491	0.734375
AC005152.3	0	0	0	0	0	0	0.168418	0.683241
AC005154.6	2.17737	1.90396	0.0465957	0.141897	0.264597	3.05721	2.14015	0.491933
AC005154.7	0	0	0	0	0	0	0	0
AC005154.8	0	0	0	0	0	0	0	0
AC005159.1	0	0	0	0	0	0	0	0
AC005160.3	0	0	0	0	0	0	0	0
AC005161.1	0	0	0	0	0	0	0	0
AC005162.4	0	0	0	0	0	0	0	0
AC005162.5	0	0	0	0	0	0	0	0
AC005176.1	0	0	0	0	0	0	0	0
AC005176.2	0	0	0	0	0	0	0	0
AC005176.3	0	0	0	0	0	0	0	0
AC005178.1	0	0	0	0	0	0	0	0
AC005189.6	0	0	0	0	0	0	0	0
AC005195.1	0	0	0	0	0	0	0	0
AC005197.2	0	0	0	0.138774	0	0	0	0
AC005215.1	0	0	0	0	0	0	0	0
AC005220.3	0	0	0.0704173	0.10722	0	0.167247	0	0
AC005224.2	0	0.640134	0.162001	0.246669	1.37991	0.76953	0.59171	0.180034
AC005229.1	0	0	0	0	0	0	0	0
AC005229.5	0	0	0	0	0	0	0	0
AC005229.7	0	0	0	0	0	0	0	0
AC005235.1	0	0	0	0	0	0	0	0
AC005237.2	0	0	0	0	0	0	0	0
AC005237.4	0	0	0	0	0	0	0	0
AC005253.2	0	8.35885	0	0.0473676	0.282647	2.51213	5.36312	0.230478
AC005253.4	27.1734	0	0	0	0	0	0	0
AC005255.3	0	0	0	0	0	0	0	0
AC005255.5	0	0	0	0	0	0	0	0
AC005255.6	0	0	0	0	0	0	0	0
AC005256.1	0	0	0	0	0	0	0	0
AC005262.2	0	0	0	0	0	0	0	0
AC005262.3	0	0	0	0	0	0	0	0
AC005262.4	0	0.247083	0	0	0	0	0	0
AC005264.2	0.119107	0.11571	0	0	0	0	0.117653	0
AC005276.1	0	0.106863	0	0	0	0	0.108657	0
AC005280.1	3.08771	14.6165	2.96062	2.69706	4.08089	2.1035	10.6473	6.44912
AC005281.1	0	0	0	0	0	0	0.219676	0
AC005281.2	0	0	0	0	0	0	0	0
AC005284.1	0	0	0	0	0	0	0	0
AC005288.1	0	0	0	0	0	0	0	0
AC005300.5	0	0	0	0	0	0	0	0
AC005301.8	0	0	0	0	0	0	0	0
AC005304.1	0	0	0	0	0	0	0	0
AC005306.3	0	2.16506	0	0	0.21391	3.80239	1.78865	0
AC005307.1	0	0	0	0	0	0	0.0579273	1.645
AC005307.3	0	0	0	0	0	0	0.0454843	0.369042
AC005324.6	0	0	0	0	0	0	0	0
AC005324.7	0	0	0	0	0	0	0	0
AC005326.2	0	0	0	0	0	0	0	0
AC005329.7	4.21546	2.00379	0.104591	0.159254	0.514737	1.03505	0.814972	1.49812
AC005330.2	0	0	0.0495613	0.150928	0	0.235424	0.0724091	2.20312
AC005336.4	0	0	0	0	0	0	0	0
AC005336.5	0	0	0	0	0	0	0	0
AC005339.2	200.463	8.6706	6.03434	13.5404	73.5827	9.0518	0.696014	69.6487
AC005351.1	0	0	0	0	0	0	0	0
AC005355.1	0	0	0	0	0	0	0	0
AC005355.2	1.1228	2.74715	1.23711	3.59609	4.47046	0	6.07949	3.99946
AC005356.1	0	0	0.915425	3.90281	0	0	0.534975	1.08515
AC005357.1	0	0	0	0	0	0	0	0
AC005358.1	0	0	0	0	0	0	0.132768	0
AC005358.3	0	0	0	0	0	0	0	0
AC005363.9	0	0	0	0	0	0	0	0
AC005370.1	0	0	0	0	0	0	0	0
AC005375.1	0	0	0	0	0	0	0	0
AC005387.2	0	0.609846	0	0	0	0	0	0
AC005387.3	1.96171	0.254103	0	0	0	0.420017	0.516738	0
AC005391.2	0	0.542086	0	0	0	0	0	0
AC005392.13	0	0	0	0	0	0	0	0
AC005394.1	0	0	0	0	0	0	0	0
AC005399.1	0	0	0	0	0	0	0	0
AC005477.1	0	0	0	0	0	0	0	0
AC005481.5	0	0	0	0	0	0	0.0526307	0
AC005484.5	0	0	0	0	0	0	0	0
AC005487.2	0	0	0	0	0	2.44557	0.136761	0
AC005488.1	0	0	0	0	0	0	0	0
AC005488.11	0	0.19112	0	0	0	0	0	0
AC005493.1	0	0	0	0	0	0	0	0
AC005498.3	0	0.457905	0	0	0	0	0	0.314804
AC005498.4	0	0	0	0	0	0	0	0
AC005513.1	0	0	0	0	0	0	0	0
AC005517.3	0	0	0	0	0	0	0	0
AC005518.2	0	0	0	0	0	0	0	0
AC005519.4	0.40411	2.09379	0.0455369	0	0	0.648922	3.85871	0
AC005522.6	0	0	0	0	0	0	0	0
AC005522.7	0	0	0	0	0	0	0	0
AC005523.2	11.9082	31.651	5.76831	4.96202	10.1335	4.75988	18.6373	15.7775
AC005523.3	0	0	0.148921	0	0	0	0.217574	0
AC005532.5	0	0	0.0503225	0	0	0	0.0735213	0
AC005534.6	0	0	0	0	0	0	0	0
AC005534.8	0	0.361634	0	0.127739	0.190558	0	0	0.372928
AC005537.2	0	0	0	0	0	0	0	0
AC005538.5	0	0	0	0	0	0	0	0
AC005539.2	0	0	0	0	0	0	0	0
AC005540.3	0	0.486638	0.135471	0	0	0	0.395847	0
AC005544.1	0	0	0	0	0	0	0	0
AC005546.2	0	2.05882	0	0	0	0	0	0
AC005549.1	0	0	0	0	0	0	0	0
AC005549.2	0	0	0	0	0	0	0	0
AC005549.3	0	0	0	0	0	0	0	0
AC005550.3	0	0	0.0498923	0	0	0	0	0
AC005550.4	0	0	0	0	0	0	0	0
AC005550.5	0	0	0	0	0	0	0	0
AC005559.2	0	0	0	0	0	0	0	0
AC005559.3	0	0	0	0	0	0	0	0
AC005562.1	2.09179	3.79332	0.377139	0.478539	0.428323	3.28436	5.05084	0.527781
AC005588.2	0	0	0	0	0	0	0	0
AC005592.1	0	0.039984	0	0	0	0	0.0406553	0
AC005592.2	0	0	0.0343727	0	0	0	0.0502186	0
AC005592.3	0	0	0	0	0	0	0	0
AC005594.3	0	0.436881	0	0	0	0.336998	0.118458	0
AC005597.1	0	0	0	0	0	0	0	0
AC005606.1	0	0	0	0	0	0.344897	0	0
AC005606.14	0	0	0	0	0	0	0	2.63895
AC005606.15	67.1342	2.8395	0.864569	0	21.0408	8.80036	0.180448	22.6933
AC005609.1	0	0	0	0	0	0	0	0
AC005609.2	0	0	0	0	0	0	0	0
AC005614.3	0	0	0	0	0	0	0	0
AC005614.5	0	0	0	0	0	0	1.18368	0
AC005616.1	0	0	0	0	0	0	0	0
AC005616.2	0	0	0	0	0	0	0	0
AC005618.1	0	1.44007	1.22493	0.339115	0	2.11586	8.94816	0
AC005618.6	0	0	0	0	0	0	0.16718	0
AC005621.1	0	0	0	0	0	0	0	0
AC005624.2	0	0	0	0	0	0	0	0
AC005625.1	0	0	0	0	0	0	0.192682	0
AC005626.3	0	0	0	0	0	0	0	0
AC005631.1	0	0	0	0	0	0	0	0
AC005682.5	0	6.5349	0.0508155	0.270807	0	0.724144	1.29923	2.78595
AC005682.6	0	0.0609708	0	0.193829	0	0.100781	0.433961	4.21262
AC005682.7	0	0	0	0	0	0	0	0
AC005682.8	0	0	0	0	0	0	0	0
AC005686.1	0	0	0	0	0	0	0	0
AC005701.1	0	0	0	0	0	0	0	0
AC005702.1	0	0	0	0	0	0	0	0
AC005702.2	0	0	0	0	0	0	0	0
AC005702.3	0	0	0	0	0	0	0	0
AC005702.4	0	0	0	0	0	0	0	0
AC005703.2	0	0	0	0	0	0	0	0
AC005703.3	0	0	0	0	0	0	0	0
AC005722.4	0	0	0	0	0	0	0	0
AC005725.1	0	0	0	0	0	0	0	0
AC005730.2	0	0	0	0	0	0	0	0
AC005740.3	0	0	0	0	0	0	0	0
AC005740.4	0	0	0	0	0	0	0	0
AC005740.5	0	0	0	0	0	0	0	0
AC005740.6	0	0	0	0	0	0	0	0
AC005741.2	0	0	0	0	0	0	0	0
AC005754.7	0	0	0	0	0	0	0.939199	0
AC005754.8	0	0	0	0	0	0	0	0
AC005757.6	0	0	0	0	0	0	0	0
AC005757.7	0	0	0	0	0	0	0	0
AC005758.1	3.09354	0	0.995983	0	0	0	0	0
AC005772.2	0	0	0	0	0	0	0	0
AC005775.2	0	0.754348	0.224996	0	0.340709	0.178128	0	1.44468
AC005776.1	0	0	0	0	0	0	0	0
AC005777.3	0	0	0	0	0	0	0	0
AC005779.1	0	0	0	0	0	0	0	0
AC005779.2	0	0.162626	0	0	0.257081	0	0	0
AC005780.1	0	0	0	0	0	0	0	0
AC005783.1	0	0	0	0	0	0	0	0
AC005785.2	0	0	0	0	0	0	0.383738	0
AC005786.3	0	0	0	0	0	0	0	0
AC005786.5	0	0	0	0	0	0	0	0
AC005786.7	76.9964	25.3293	9.14453	4.69719	16.7671	29.3075	6.92154	110.522
AC005789.11	0	0	0	0	0	0	0	0
AC005789.9	0	0	0	0	0	0	0	0
AC005794.1	0	0	0	0	0	0	0	0
AC005795.1	0	0	0	0	0	0	0	0
AC005808.3	0	0	0	0	0	0	0	0
AC005822.1	0	0	0	0	0	0	0	0
AC005831.1	0	0	0	0	0	0	0.051266	0
AC005838.2	0	0	0	0	0	0	0	0
AC005841.1	0	0.476273	0	0	0	0	0.0968539	0
AC005863.1	0	0	0	0	0	0	0	0
AC005863.2	0	0	0	0	0	0	0	0
AC005884.1	0	0	0	0	0	0	0	0
AC005926.1	0	0	0	0	0	0	0	0
AC005932.1	0	0	0.260184	0	0.147747	1.23591	1.14039	0
AC005943.4	0	0	0	0	0	0	0	0
AC005943.5	0	0	0	0	0	0	0	0
AC005944.2	236.296	47.2595	5.29778	9.74714	41.616	74.4473	6.77256	52.3333
AC005954.3	0	0	0	0	0	0	0	0
AC005954.4	0	0.321741	0	0	0	0	0.654286	0
AC006000.5	0	0	0	0	0	0	0	0
AC006001.1	0	0	0	0	0	0	0	0
AC006003.3	0	0	0	0	0	0	0	0
AC006004.1	0	0	0	0	0	0	0	0
AC006007.1	0	0	0.0926323	0	0	0	0	0
AC006011.4	0	0	0	0	0	0	0	0
AC006014.1	0	0	0	0	0	0	0	0
AC006014.10	0	0.232021	0	0	0	0	0.0393194	0
AC006014.7	0	1.88123	0	0	0	1.41344	1.39114	0
AC006014.8	2.33867	1.99296	0	0.168953	0	0.52708	0.891626	0
AC006019.3	0	0	0	0	0	0	0	0
AC006019.4	0	0	0	0	0	0	0	0
AC006022.4	0	0	0	0	0	0	0	0
AC006023.8	0	0	0	0	0	0	0	0
AC006024.4	0	0	0	0	0	0	0	0
AC006026.1	0	0	0	0	0	0	0	0
AC006026.10	0	0	0	0	0	0	0	0
AC006026.12	0	0	0	0	0	0	0	0
AC006026.13	0	0	0	0	0	0	0	0
AC006026.9	0	0	0	0	0	0	0	0
AC006028.11	0	0	0	0	0	0	0	0
AC006033.22	0	0	0	0	0	0	0	0
AC006035.1	0	0	0	0	0	0	0	0
AC006037.2	0	0	0	0	0	0	0.316884	0
AC006041.1	0	0	0	0	0	0	0	0
AC006042.6	0	0	0	0	0	0	0	0
AC006042.7	0	0.157472	0	0	0	0	0	0
AC006042.8	0	0.182663	0	0.0645218	0	0	0.55719	0
AC006045.3	0	0	0	0	0	0	0	0
AC006050.2	0	0	0	0	0	0	0	4.07765
AC006070.12	0	0	0	0	0	0	0	0
AC006076.1	0	0	0	0	0	0	0	0
AC006077.4	0	0	0	0	0	0	0	0
AC006080.1	0	0	0	0	0	0	0	0
AC006111.1	0	2.76631	0	0	0.257236	0	0.716977	0
AC006115.1	0	0	0	0	0	0	0	0
AC006115.3	0	0	0	0.0315626	0.141253	0	0.030285	0.337866
AC006115.6	0	0	0	0	0	0	0	0
AC006116.1	0	0	0	0	0	0	0	0
AC006116.12	2.74987	0	0	0.209696	0	0	0	0
AC006116.13	0	0	0	0	0	0	0	0
AC006116.14	0	0	0	0	0	0	0	0
AC006116.15	0	0	0	0	0	0	0	0
AC006116.17	0	0.0867547	0	0	0	0	0.0882113	0
AC006116.19	0	0	0	0	0	0	0	0
AC006116.20	0.561148	0.121143	0	0.128374	0	0	0.123177	0
AC006116.21	0	0	0	0	0	0	0	0
AC006116.22	0	0.164798	0	0	0	0	0.167565	0
AC006116.24	0	0	0	0	0	0	0	0
AC006116.27	0	0	0	0	0	0	0	0
AC006126.3	0	0	0	0	0	0	0.168418	0
AC006126.4	0	0.583331	0.405971	0.206049	0	2.24983	1.58167	0
AC006129.1	0	0.0923056	0	0	0	6.56076	1.97096	0
AC006129.2	0	0.062114	0.0432284	0.921497	0.589143	2.36143	15.9787	0.896753
AC006129.4	0	0.1191	0	0.252417	0	4.72477	3.63299	3.93023
AC006130.1	0	0	0	0	0	0	0	0
AC006130.3	0	0	0	0	0	0	0	0
AC006130.4	0	0	0	0	0	0	0	0
AC006133.3	0	0	0	0	0	0	0	0
AC006145.1	0	0	0	0	0	0	0	0
AC006150.1	0	0	0	0	0	0	0	0
AC006150.2	0	0	0	0	0	0	0	0
AC006153.3	0	0	0.163813	0	0	0	0	0
AC006156.1	0	0	0	0	0	0	0	0
AC006156.2	0	0	0	0	0	0	0	0
AC006159.3	0	0	0.0661519	0.100725	0	0	1.06313	1.76437
AC006159.4	0	0	0	0	0	0	0.131425	0.399873
AC006159.5	0	0	0	0	0	0	0	0
AC006160.5	0	0	0	0	0.188526	0	0.242522	0
AC006195.2	0	0	0	0	0	0	0	0
AC006196.1	0	0	0	0	0	0	0	0
AC006227.1	0	0	0	0	0	0	0	0
AC006262.10	0	0	0	0	0	0	0	0
AC006262.4	0	0	0	0	0	0	0	0
AC006262.5	0	0	0	0	0	0	0	0
AC006262.6	0.739055	0	0	0	0	0	0	0
AC006272.1	0	0.211452	0	0	0	0	0.215002	0
AC006272.2	0	0	0	0	0	0.267837	0	0
AC006273.4	0	0	0	0	0	0	0	0
AC006273.5	0	0	0.0715505	0.435782	0.162522	0	0.522677	0
AC006273.7	0	0	0	0	0	0	0	0
AC006277.2	0	0	0	0.244285	0	0	0.234396	0.713176
AC006296.1	0	0	0	0	0	0	0	0
AC006296.2	0	0	0	0	0	0	0	0
AC006322.1	0	0	0	0	0	0	0	0
AC006326.3	0	0	0	0	0	0	0	0
AC006326.5	0	0	0	0	0	0	0	0
AC006328.1	0	0	0	0	0	0	0	0
AC006328.9	0	0	0	0	0	0	0	0
AC006335.10	0	0	0	0	0	0	0	0
AC006335.11	0	0	0	0	0	0	0	0
AC006335.2	0	0	0	0	0	0	0	0
AC006335.6	0	0	0	0	0	0	0	0
AC006355.3	0	0	0	0	0	0	0	0
AC006366.3	0	0	0	0	0	0	0	0
AC006369.2	0	0	0	0	0	0	0.829798	0
AC006369.3	0	0	0	0	0	0	0	0
AC006371.1	0	0	0	0	0	0	0	0
AC006372.1	0	0	0	0	0	0	0	0
AC006372.4	0	0.0220904	0	0	0	0	0	0
AC006372.5	0	0	0	0	0	0	0	0
AC006372.6	0	0	0	0	0	0	0	0
AC006373.1	0	0	0	0	0	0	0.251927	0
AC006377.1	0	0	0	0	0	0	0	0
AC006378.2	0	0.140635	0	0	0	0	0	0
AC006380.1	0	0	0	0	0	0	0	0
AC006380.3	0	0	0	0	0	0	0	0
AC006390.4	0	0	0	0	0	0	0	0
AC006427.2	0	0	0	0	0	0	0	0
AC006432.1	0	0	0	0	0	0	0	0
AC006435.1	0	0	0	0	0	0	0	0
AC006445.6	0	0	0	0	0	0	0	0
AC006445.7	0	0.568501	0	0	0	0	0	0
AC006449.1	0	0	0	0	0	2.82766	0	0
AC006452.1	0	0	0	0	0	0	0	0
AC006455.1	0	0	0	0	0	0	0	0
AC006458.3	0	0	0	0	0	0	0	0
AC006460.2	0	0.0795059	0	0	0.628419	0	0.0808407	0
AC006461.2	0	0	0	0	0	0	0	0
AC006465.4	0	0	0	0	0	0	0	0
AC006466.5	0	0	0	0	0	0	0	0
AC006480.1	0	0	0	0	0	0	0	0
AC006482.1	0	0	0	0	0	0	0	0
AC006483.1	0	0	0	0	0	0	0	0
AC006483.5	0	0	0	0	0	0	0	0
AC006486.1	0	0.935523	0.0283078	0.0431026	0	0	0.248147	0.545288
AC006486.9	0	0	0	0	0	0	0	0
AC006487.1	0	0	0	0	0	0	0	0
AC006499.1	0	0	0	0	0	0	0	0
AC006499.2	0	0	0	0	0	0	0	0
AC006499.3	0	0	0	0	0	0	0	0
AC006499.4	0	0	0	0	0	0	0	0
AC006499.5	0	0	0	0	0	0	0	0
AC006499.6	0	0	0	0	0	0	0	0
AC006499.7	0	0	0	0	0	0	0	0
AC006499.8	0	0	0	0	0	0	0	0
AC006499.9	0	0	0	0	0	0	0	0
AC006509.4	0	0	0	0	0	0	0	0
AC006509.7	0	0	0	0	0	0	0	0
AC006534.1	0	0	0	0	0	0	0	0
AC006534.2	0	0	0	0	0	0	0	0
AC006538.1	0	0	0	0	0	0	0	0
AC006538.4	0	0	0	0	0.520789	0	1.17241	0
AC006539.1	0	0	0	0	0	0	0	0
AC006539.2	0	0	0	0	0	0	0	0
AC006539.3	0	0	0	0	0	0	0.476989	0
AC006539.4	0	0	0	0	0	0	0	0
AC006547.13	0	1.89142	0	0.0527449	0	0.822738	1.0122	0
AC006547.14	0	0	0	0	0.19817	0.621637	0.127464	0.258549
AC006547.15	0	0	0	0	0	0	0	0
AC006547.8	0	0	0	0	0	0	0	1.75356
AC006548.19	0	0	0	0	0	0	0	0
AC006548.26	0	0	0	0	0	0	0	0
AC006552.1	0	0	0	0	0	0	0	0
AC006557.1	0	0	0	0	0	0	0	0
AC006926.1	0	0	0	0	0	0	0	0
AC006942.4	5.04613	0.344016	0.239419	1.27592	0.271912	0.568638	0.874479	0.709519
AC006946.12	0	0	0	0	0	0	0	0
AC006946.15	0	0.132118	0	0	0	0	0.0671683	0
AC006946.16	0	0	0	0	0	0	0	0
AC006946.17	0	0	0	0	0	0	0	0
AC006947.1	0	0	0	0	0	0	0	0
AC006953.1	0	0	0	0	0	0	0	0
AC006960.5	0	0	0	0	0	0	0	0
AC006960.7	0	0	0	0	0	0	0	0
AC006967.1	0	0	0	0	0	0	0	0
AC006978.6	0	0	0	0	0	0	0	0
AC006987.4	0	0	0	0	0	0	0	0
AC006987.5	0	0	0	0	0	0	0	0
AC006987.6	0	0	0	0	0	0	0	0
AC006987.7	0	0	0	0	0	0	0	0
AC006988.1	0	0	0	0	0	0	0	0
AC006989.2	0	0	0	0	0	0	0	0
AC006994.1	0	0	0	0	0	0	0	0
AC006994.2	0	1.94444	0	0	0	0	0.179735	0
AC006994.3	0	0	0	0	0	0	0	0
AC006995.8	0	0	0	0	0	0	0	0.15341
AC007000.10	0	0	0	0	0	0	0	0
AC007000.11	0	0	0	0	0	0	0	0
AC007000.12	0	0	0	0.099457	0	0	0.954311	0
AC007003.1	0	0	0	0	0	0	0	0
AC007009.1	0	0.833978	0	0.441877	0.659181	0	4.45189	1.93505
AC007009.2	0	0	0	0	0	0	0	0
AC007016.3	0	0	0	0	0	0	0	0
AC007025.1	0	0	0	0	0	0	0	0
AC007036.4	0	0	0	0	0	0	0	0
AC007036.5	6.74778	0	0	0	0	0.240792	0	0
AC007036.6	0	0.132706	0	0	0	1.53549	0.269869	0
AC007038.7	0	4.63694	0.0283078	0.0431026	0	0.0672333	0.454936	0.461397
AC007040.1	0	0	0	0	0	0	0	0
AC007040.11	0.0620556	0.0200953	0	0	0	0.0664327	0	0
AC007040.2	0	0	0	0	0	0	0	0
AC007040.3	0	0	0	0	0	0	0	0
AC007040.6	0	0	0	0	0	0	0	0
AC007040.7	0	0	0	0	0	0	0.0798471	0
AC007040.8	0	0	0.218417	0	0	0	0	0
AC007041.1	0	0	0	0	0	0	0	0
AC007041.2	0	0	0	0	0	0	0	0
AC007050.1	0	0	0	0	0	0	0	0
AC007050.17	0	0	0	0	0	0	0	0
AC007050.18	0	0	0	0	0	0	0	0
AC007056.1	0	0	0	0	0	0	0	0
AC007064.22	0	0	0	0	0	0	0	0
AC007064.24	0	0	0	0	0	0	0	0
AC007064.25	0	0	0	0	0	0	0	0
AC007078.4	0	0	0	0	0	0	0	0
AC007091.1	0	0	0	0	0	0	0	0
AC007096.1	0	0	0	0	0	0	0	0
AC007098.1	0	0	0	0	0	0	0	0
AC007099.1	0	0	0	0	0	0	0	1.01189
AC007099.2	0	0	0	0	0	0	0	0
AC007106.1	0	0	0	0	0	0	0	0
AC007114.1	0	0	0	0	0	0	0	0
AC007115.3	0	0	0	0	0	0	0	0
AC007126.1	0	0	0	0	0	0	0	0
AC007128.1	0	0	0	0	0	0	0	0
AC007131.1	0	0	0	0	0	0	0.0446689	0.181213
AC007131.2	0	0	0	0	0	0	0	0
AC007131.3	0	0	0	0	0	0	0	0
AC007136.1	0	0	0	0	0	0	0	0
AC007161.5	0	0.0602317	0	0	0	0	0.122486	0
AC007163.10	0	0	0	0	0	0	0	0
AC007163.11	0	0	0	0	0	0	0	0
AC007163.3	0	0	0	0	0	0.3606	0.0443638	0
AC007163.6	0	0	0	0	0	0	0.103701	0
AC007163.8	0	0	0	0	0	0	0	0
AC007163.9	0	0	0	0	0	0	0	0
AC007179.1	0	0	0	0	0	0	0	0
AC007179.2	0	0	0	0	0	0	0	0
AC007182.6	0	0.165714	0.0576646	0.0439011	0.654906	0.0684789	0.0842481	0
AC007192.6	116.927	1.35229	0.941129	4.91313	24.1256	10.8569	0	64.7455
AC007193.10	0.292595	0	0	0	0	0	0	0
AC007193.6	0	0	0	0	0	0	0	0
AC007193.8	0	0	0	0	0	0	0	0
AC007193.9	0	0	0	0	0	0	0	0
AC007204.1	0	0	0	0	0	0	0	0
AC007204.2	0	0	0	0	0	0	0	0
AC007216.1	0	0	0	0	0	0	0	0
AC007216.2	0	0	0	0	0	0	0	0
AC007228.11	0	0	0.0913187	0.231742	0.138283	0.433778	0.133417	0.631455
AC007228.5	0	0	0	0	0	0	0	0
AC007228.8	0	0	0	0	0	0	0	0
AC007228.9	0	0	0	0	0	0	0	0
AC007229.3	0	0	0	0	0	0	0	0
AC007237.2	0	0	0	0	0	0	0	0
AC007238.1	0	0	0	0	0	0	0	0
AC007241.1	0	0	0	0	0	0	0	0
AC007242.1	0	0	0	0	0	0	0	0
AC007246.3	1.2907	0.822658	1.34822	1.57479	0.839011	0.965024	2.9951	0.602054
AC007248.6	0	0	0	0	0	0	0	0
AC007248.7	0	0	0	0	0	0	0	0
AC007249.3	0.838692	0	0	0	0.286223	0	0.552302	0
AC007250.4	0	0	0	0	0	0	0	0
AC007251.2	0	0	0	0	0	0	0	0
AC007253.1	0	0	0	0	0	0	0	0
AC007255.8	0	0	0	0	0	0.616025	0.0631568	0
AC007256.5	0	0	0	0	0	0	0	0
AC007271.3	0	0	0	0	0	0	0	0
AC007272.1	0	0	0	0	0	0	0	0
AC007272.3	0	0	0	0	0	0	0	0
AC007274.2	0	0	0	0	0	0	0	0
AC007274.5	0	0	0	0	0	0	0	0
AC007277.3	0	0	0	0	0	0	0.335819	0.185775
AC007278.2	0	0.0745368	0	0	0	0	0.303153	0
AC007278.3	0	0	0	0	0.213104	0	0.27414	0
AC007279.2	0	0	0	0	0	0	0	0
AC007282.6	0	0	0	0	0	0	0	0
AC007283.4	0	0	0	0	0	0	0	0
AC007283.5	18.0002	9.8489	2.23816	1.27797	1.90644	5.64805	6.33555	9.94921
AC007285.6	0	0.0938553	0	0	0	0	0	0
AC007285.7	0	0.172672	0	0.182978	0	0	0.351142	0
AC007292.1	0	0	0	0	0	0	0	0
AC007292.3	0	0	0	0	0	0	0	0
AC007292.4	0	0	0	0	0	0	0.25475	0
AC007292.6	0	0.119898	0.0834436	0.254109	0.947683	0	2.68205	0.741856
AC007292.7	2.47499	0.320588	0	0.339722	0	0	0.325971	0
AC007308.6	0	0.447221	0	0	0	0	0.454729	0
AC007308.7	2.22152	0	0	0	7.58146	2.37822	0	7.66585
AC007312.3	0	0	0	0	0	0	0	0
AC007316.3	0	0	0	0	0	0	0	0
AC007317.1	0	0	0	0	0	0	0	0
AC007318.5	0	0	0	0	0	0	0	0
AC007319.1	0.938211	0	0.0422887	0	0	0.200878	0.80319	0.125323
AC007322.1	0	0	0	0	0	0	0	0
AC007322.3	0	0	0	0	0	0	0	0
AC007322.5	0	0	0	0	0	0	0	0
AC007322.7	0	0	0	0	0	0	0	0
AC007326.9	0	0	0	0	0	0	0	0
AC007327.5	0	0	0	0	0	0	0	0
AC007327.6	0	0	0	0	0	0	0	0
AC007333.1	0	0	0	0	0	0	0	0
AC007339.1	0	0	0	0	0	0	0	0
AC007347.1	13.8301	12.1969	5.79163	6.59708	11.0464	7.66531	1.6794	8.31972
AC007349.4	0	0	0	0	0	0	0	0
AC007349.5	0	0	0	0	0	0	0.312887	0
AC007349.7	0	0	0	0	0	0	0.164459	0
AC007353.1	0	0	0	0	0	0	0	0
AC007358.1	0	0	0	0	0	0	0	0
AC007359.6	0	0	0	0	0	0	0	0
AC007362.1	2.27001	1.42276	0.726128	0.954861	3.37367	26.7314	8.96921	2.44532
AC007362.3	0	0	0	0	0	0	0	0
AC007364.1	0	0	0	0.088047	0	0	0	0.0428414
AC007365.1	0	0	0	0	0	0	0.0471466	0
AC007365.2	0	0	0	0	0	0	0	0
AC007365.3	0	0	0	0	0	0	0.580197	0
AC007365.4	0	0	0	0	0	0	0	0
AC007375.1	0	0	0	0	0	0	0	0
AC007377.1	0	0	0	0	0	0	0	0
AC007381.2	0	0	0	0	0	0	0.0871128	0
AC007381.3	0	0	0	0	0	0	0.0453595	0
AC007382.1	0	1.31535	0.305142	0	0	0	0	0
AC007383.3	0.40069	2.9411	0.903031	1.64999	0.410235	4.14655	3.95799	1.33807
AC007383.4	0	0	0.308818	0.201522	0	0	0	0
AC007383.6	0	0	0	0	0	0	0	0
AC007386.2	0	0	0	0	0	0	0	0.189011
AC007386.3	0	0	0	0	0	0	0	0
AC007386.4	0	0	0.125755	0	0	0	0	0
AC007387.2	0	0	0	0	0	0	0	0
AC007389.1	0	0	0	0	0	0	0	0
AC007389.2	0	0	0	0	0	0	0	0
AC007389.3	0	0.270061	0	0	0	0	0	0
AC007389.4	0	0	0	0	0	0	0	0
AC007390.4	0	0	0	0	0	0	0	0
AC007391.2	0	0.177469	0	0	0	0	0	0
AC007392.3	0	0	0	0	0	0	0	0
AC007392.4	0	0	0	0	0	0	0	0
AC007394.3	0	0	0	0	0	0	0	0
AC007395.3	0	0	0	0	0	0	0	0
AC007395.4	0	0	0	0	0	0	0	0
AC007401.1	0	0.0468049	0	0	0	0	0.0475907	0
AC007401.2	0	0.20801	0	0	0	0	0	0
AC007402.1	0	0	0	0	0	0	0	0
AC007403.1	0	0	0	0	0	0	0	0
AC007403.2	0	0	0	0	0	0	0	0
AC007403.3	0	0	0	0	0	0	0.160398	0
AC007405.4	0	0.220741	0	0.0467831	0.0697899	0	0.134668	0
AC007405.6	0	0.554979	1.02997	1.07819	1.90085	0.152891	5.36082	3.33848
AC007405.8	0	0.107505	0	0	0	0	0	0
AC007421.1	0	0	0	0	0	0	0	0
AC007422.1	0	0	0	0	0	0	0	0
AC007435.1	0	0	0	0	0	0	0	0
AC007436.1	0	0	0	0	0	0	0	0
AC007450.1	0	0	0	0	0	0	0	0
AC007461.1	0	0	0	0	0	0	0	0
AC007461.2	0	0	0	0	0	0	0	0
AC007463.2	0	0	0	0	0	0	0	0
AC007486.1	0	0	0	0	0	0	0	0
AC007528.1	0	0	0	0	0	0	0	0
AC007535.1	0	0	0	0	0	0	0	0
AC007551.1	0	0	0	0	0	0	0	0
AC007551.2	0	0	0	0	0	0	0	0
AC007551.3	0	0.132477	0.0614653	0.116987	0.0349036	0.693427	0.291853	0
AC007556.3	0	0	0	0	0	0	0	0
AC007557.1	0	0	0	0	0	0	0	0.704103
AC007557.2	0	0	0	0	0	0	0	0
AC007557.3	0	0	0	0	0	0	0	0
AC007557.4	0	0	0	0	0	0	0	0
AC007559.1	0	0	0	0	0	0	0	0
AC007560.1	0	0	0	0	0	0	0	0
AC007560.2	0	0	0	0	0	0	0	0
AC007562.1	0	0	0	0	0	0	0	0
AC007563.1	0	0	0	0	0	0	0	0
AC007563.3	0	0	0	0	0	0	0	0
AC007563.4	0	0	0	0	0	0	0	0
AC007563.5	0	0	0	0	0	0	0	0
AC007566.10	1.18207	1.91393	0.1776	0.135211	0.201704	1.05454	5.18949	0
AC007567.1	0	0	0	0	0	0	0	0
AC007568.1	0	0	0	0	0	0	0	0
AC007611.1	0	0	0	0	0	0	0	0
AC007618.3	0	0	0	0	0	0	0	0
AC007620.3	0	49.1689	1.86009	2.0021	2.54961	10.1306	20.4757	0.0950412
AC007631.1	0	0	0	0	0	0	0	0
AC007652.1	0	0	0	0	0	0	0	0
AC007677.2	0	0	0	0	0	0	0	0
AC007679.1	0	0.178176	0	0	0	0.294514	0	0
AC007679.3	0	0	0	0	0	0	0	0
AC007679.4	0	0	0	0	0	0	0	0
AC007680.2	0	0	0	0	0	0	0	0
AC007682.1	0	0	0	0	0	0	0	0
AC007682.2	0	0	0	0	0	0	0	0
AC007682.3	0	0	0	0	0	0	0	0
AC007690.1	0	1.30894	0	0.0513727	0	0	0.197172	0.0999864
AC007731.1	0	0	0	0	0	0	0	0
AC007740.1	0	0	0	0	0	0	0	0
AC007742.3	0	0	0	0	0	0	0	0
AC007742.7	0	0	0	0	0	0	0	0
AC007743.1	0	0	0	0	0.0380809	0.119455	0.514372	0.0248418
AC007750.5	0	0	0.0161686	0	0	0	0	0
AC007773.1	0	0	0	0	0	0	0	0
AC007773.2	1.56291	0.0920207	0.128084	0.585078	0.290935	0.60842	0.467828	1.04384
AC007773.3	0	0.162036	0	0	0	0	0	0
AC007787.2	0	0	0	0	0	0	0	0
AC007790.4	0	0	0	0	0	0.189061	0	0
AC007795.1	0	0	0	0	0	0	0	0
AC007796.1	0	0	0	0	0	0	0	0
AC007842.1	0	0	0	0	0	0	0	0
AC007875.2	0	0	0	0	0	0	0	0
AC007875.3	0	0	0	0	0	0	0	0
AC007879.1	0	0	0	0	0	0	0	0
AC007879.2	0	0	0	0.0865594	0	0	0.830555	0
AC007879.3	0	0	0	0	0	0	0	0
AC007879.4	0	0	0	0	0	0	0	0
AC007879.5	0	0	0	0	0	0	0.35415	0
AC007879.6	0	0	0	0	0	0	0	0
AC007879.7	0	0.148578	0	0	0	2.45591	0	0
AC007880.1	0.768412	0.0904847	0	0	0	0.074783	0	0
AC007881.1	0	0	0	0	0	0	0	0
AC007881.2	0	0	0	0	0	0	0	0
AC007881.4	0	0	0	0	0	0	0	0
AC007899.3	0	0	0	0	0	0	0	0
AC007919.1	0	0	0	0	0	0	0	0
AC007919.18	0	0	0	0	0	0	0	0
AC007919.19	0	0	0	0	0	0	0	0
AC007919.2	0	0	0	0	0	0	0	0
AC007948.1	0	0	0	0	0	0	0	0
AC007950.1	0	0	0	0	0	0	0	0
AC007952.1	0	0	0	0	0	0	0	0
AC007952.4	2.51099	0	0	0	0	0.672027	0	0.419261
AC007952.5	1.61359	0	0	0	0	0	0	0
AC007952.6	0	0	0	0.0652772	0.292137	0	0.0626349	0
AC007956.1	0	0	0	0	0	0	0	0
AC007965.1	0	0	0	0	0	0	0	0
AC007966.1	0	0	0	0	0	0.301317	0.185352	0.187984
AC007967.2	0	0	0	0	0	0	0	0
AC007967.3	0	0	0	0	0	0	0	0
AC007967.4	0	0	0	0	0	0	0	0
AC007969.4	0	0	0	0	0	0	0	0
AC007969.5	0	0	0	0	0	0	0	0
AC007970.1	0	0.160967	0	0	0	0	0	0
AC008045.1	0	0	0	0	0	0	0	0
AC008060.5	0	0	0	0	0	0	0	0
AC008060.7	0	0	0	0	0	0	0	0
AC008060.8	0	0	0	0	0	0	0	0
AC008063.2	0	0	0	0	0	0	0.284206	0
AC008063.3	0	0	0	0	0	0.238847	0	0
AC008064.1	0	0	0	0	0	0	0	0
AC008065.1	0	0	0	0	0	0	0	0
AC008067.2	0	0	0	0	0	0	0	0
AC008069.1	0	0	0	0	0	0	0	0
AC008069.2	0	0	0	0	0	0	0.0957324	0
AC008072.1	0	0	0	0	0	0	0	0
AC008073.7	0	0	0	0	0	0	0	0
AC008073.9	0	0	0	0	0	0	0.167488	0
AC008074.3	0	0	0.0860981	0.131096	0	0	0.251579	0
AC008074.4	0	0	0	0	0	0	0	0
AC008074.5	0	0	0	0	0	0	0	0
AC008079.9	0	0	0	0	0	0	0	0
AC008085.1	0	0	0	0	0	0	0	0
AC008088.4	0	0	0	0	0	0	0	0
AC008122.1	0	0	0	0	0	0	0	0
AC008132.1	0	0	0	0	0	0	0	0
AC008132.12	0	0	0	0	0	0	0	0
AC008132.13	0	0.046531	0	0	0.0735567	0.0192282	0	0.011996
AC008132.14	0	0	0	0	0	0	0	0
AC008147.1	0	0	0	0	0	0	0	0
AC008147.2	0	0	0	0	0	0	0	0
AC008154.4	0	0	0	0	0	0	0	0
AC008154.5	1.68935	0	0	0	0	0	0	0
AC008155.1	0	0	0	0	0	0	0	0
AC008155.2	0	0	0	0	0	0	0	0
AC008163.4	0	0	0	0	0	0	0	0
AC008163.6	0	0	0	0	0	0	0	0
AC008166.1	0	0	0	0	0	0	0	0
AC008171.1	0	0	0	0	0	0	0	0
AC008173.1	0	0	0	0	0	0	0	0
AC008174.3	0	0.101641	0	0	0	0	0.206695	0.209631
AC008175.1	0	0	0	0	0	0	0	0
AC008264.4	0	0	0	0	0	0	0	0
AC008265.2	0	0	0	0	0	0	0	0
AC008267.1	0	0.0766445	0	0	0	0	0	0
AC008268.1	0	0	0	0	0	0	0	0
AC008268.2	0	0	0	0	0	0.0658557	0.0810208	0
AC008269.2	0	0	0	0	0	0	0	0
AC008271.1	0	0	0	0	0.12721	0	0	0
AC008277.1	0	0.0642558	0	0	0	0	0	0
AC008278.2	0	0	0	0	0	0	0	0
AC008278.3	0	0	0	0	0	0	0	0
AC008280.1	0	0	0	0.230055	0	0	0	0
AC008280.3	0	0	0	0	0	0	0	0
AC008281.1	0	0	0	0	0	0	0	0
AC008372.1	0	0	0	0	0	0	0	0
AC008387.1	0	0	0	0	0	0	0	0
AC008391.1	0	0	0	0	0	0	0	0
AC008394.1	0	0	0	0	0	0.0763667	0	0
AC008397.1	0	0	0	0	0	0	0	0
AC008410.1	0	0	0	0	0	0	0	0
AC008427.2	0	0	0	0	0	0	0	0
AC008440.10	0	0	0	0	0	0	0.163866	0
AC008440.5	0	0	0	0	2.00559	13.6312	0.215002	0
AC008443.1	0	9.47848	0	0	0	1.03389	0.293531	0
AC008498.1	0	0	0	0	0	0	0	0
AC008536.1	0	0	0	0	0	0	0	0
AC008555.1	0	0	0	0	0	0	0	0
AC008555.2	0	0	0	0	0	0	0.388657	0
AC008565.1	0	0	0	0	0	0	0	0
AC008581.1	0	0	0	0	0	0	0	0
AC008592.3	0	0.641944	0.297842	0	0	0	0.870295	0
AC008592.4	1.8414	0	0.414993	0.210628	0.942629	0	0	0
AC008592.5	0	0	0	0	0	0	0	0
AC008592.7	0	0.156645	0	0	0	0	0	0
AC008592.8	0	0	0	0	0	0	0	0
AC008625.1	0	0	0	0	0	0	0	0
AC008671.1	0	0	0	0	0	0	0	0
AC008674.1	0	0	0	0	0	0	0	0
AC008686.1	0	0	0	0	0	0	0	0
AC008691.1	0	0	0	0	0	0	0	0
AC008694.2	0	0	0	0	0	0	0	0
AC008694.3	0	0	0	0	0	0	0	0
AC008697.1	0	0	0	0	0	0	0	0
AC008703.1	0	0	0	0	0	0	0	0
AC008703.2	0	0	0	0	0	0	0	0
AC008706.1	0	0	0	0	0	0	0	0
AC008731.1	0	2.55555	0	0	0.790403	1.10196	0.28244	0.687484
AC008738.1	43.2904	133.354	127.571	72.93	217.129	17.0088	195.32	115.909
AC008738.2	0	0	0	0	0	0	0	0
AC008746.10	0	0	0	0	0	0	0	0
AC008746.12	0	0	0	0	0	0	0	0
AC008746.3	0	0	0	0	0	0	0	0
AC008746.5	0	0	0	0	0	0	0	0
AC008746.9	0	0	0	0	0	0	0	0
AC008747.1	0	0	0	0	0	0	0	0
AC008752.1	0	0	0	0	0	0	0	0
AC008752.2	0	0	0	0	0	0	0	0
AC008752.3	0	0	0	0	0	0	0	0
AC008753.3	0	0	0	0	0	0	0	0
AC008753.4	0	0	0	0	0	0	0	0
AC008753.6	0	0	0	0	0	0	0	0
AC008780.1	0	0	0	0	0	0	0	0
AC008781.7	0	0.720162	0	0	0	0	0	0
AC008834.1	0	0	0	0	0	0	0	0
AC008834.2	0	0	0	0	0	0	0	0
AC008836.1	0	0	0	0	0	0	0	0
AC008850.3	0	0	0	0	0	0	0	0
AC008865.1	10.3152	0	2.8819	4.97316	8.29164	15.4234	0.89823	8.48357
AC008869.1	0	0	0	0	0	0	0	0
AC008914.1	0	0	0	0	0	0	0	0
AC008937.2	0	0	0	0	0	0	0	0
AC008937.3	0	0.29358	0	0	0	0	0.199006	0
AC008938.1	0	0	0	0	0	0	0	0
AC008940.1	0	0	0	0	0	0	0	0
AC008948.1	0	0.62114	2.59371	3.3509	0	0.280011	0	2.32923
AC008949.1	0	0	0	0	0	0	0	0
AC008964.1	4.98923	5.29574	2.81104	6.18251	1.70269	74.6277	13.0966	12.0793
AC008967.1	0	0	0	0	0	0	0	0
AC008982.2	0	2.35857	0	0	0	0	0.184474	0
AC008984.2	0	0	0	0.0545354	0	0	0.0523279	0.318426
AC008984.5	0	0	0	0	0	0	0	0
AC008984.6	0	0	0	0	0	0	0	0
AC008984.7	0	0	0	0	0	0	0	0
AC008991.1	0	0	0	0	0	0	0	0
AC008992.1	0	0	0	0	0	0	0	0
AC009005.2	0	17.047	0.146468	0	0	2.08724	0.748966	0.868117
AC009009.1	0	0	0	0	0	0	0	0
AC009014.3	0	0	0	0	0	0	0	0
AC009035.1	0	0	0	0	0	0	0	0
AC009041.1	0	0	0	0	0	0	0	0
AC009041.2	0	0	0	0	0	0	0	0
AC009052.12	0	0	0	0	0	0	0	0
AC009060.1	0	0	0	0	0	0	0	0
AC009061.1	0	1.53289	0.0266705	0	0.0605802	0	0.89621	0
AC009065.1	0	0	0	0	0	0	0	0
AC009065.2	0	0	0	0	0	0	0	0
AC009065.3	0	0	0	0	0	0	0	0
AC009080.1	0	0	0	0	0	0	0	0
AC009081.1	0	0	0	0	0	0	0	0
AC009093.1	0	0.141376	0	0	0	0.467374	0.0479167	0
AC009095.4	0	0.171349	0	0	0	0	0	0
AC009107.1	0	0	0	0	0	0	0	0
AC009110.1	0	0	0	0	0	0	0	0
AC009120.10	0	0	0	0	0	0	0	0
AC009120.3	0	2.64739	0	0	0	0	0.576823	0
AC009120.4	0	0	0	0	0	0	0	0
AC009120.5	0	2.96404	0	0	0	0	0.354565	0
AC009120.6	1.93367	2.04331	0.0458725	0.139694	0	0.326852	0.402119	2.51495
AC009120.8	0	0	0	0	0	0	0	0
AC009121.1	0	0	0	0	0	0	0	0
AC009132.1	0	0	0	0	0	0	0	0
AC009133.12	2.08691	2.22616	0.110665	0.75826	2.51368	2.23412	1.69766	0.409944
AC009133.14	5.52419	5.80977	0.274124	0.243478	0.726429	1.57341	2.70334	3.89259
AC009133.15	0	0	0	0	0	0	0	0
AC009133.17	0	0.486109	0	0	0	0.089279	0.384433	0
AC009133.20	0	0	0	0	0	0	0	0.3132
AC009133.21	0	0	0	0	0	0	0	0
AC009134.1	0	0	0	0	0	0	0	0
AC009142.1	0	0	0	0	0	0	0	0
AC009158.1	0	0	0	0	0	0	0	0
AC009159.1	0	0	0	0	0	0	0	0
AC009161.1	0	0	0	0	0	0	0	0
AC009166.5	2.26866	0	1.53385	1.36238	1.16135	0	1.30723	0
AC009196.1	0	0	0	0	0	0	0	0
AC009227.2	0	0	0	0	0	0	0	0
AC009227.3	0	0	0	0	0	0	0	0
AC009228.1	0	0	0	0	0	0	0.145049	0
AC009229.5	0	0	0	0	0	0	0	0
AC009229.6	0	0	0	0	0	0	0	0
AC009234.1	0	0	0	0	0	0	0	0
AC009234.2	0	0	0	0	0	0	0	0
AC009236.2	0	0	0	0	0	0	0	0
AC009237.10	0	0	0	0	0	0	0	0
AC009237.11	0	0	0	0	0	0	0	0
AC009237.13	0	0	0	0	0	0	0	0
AC009237.14	0	0	0	0	0	0	0	0
AC009237.16	0	0	0	0	0	0	0	0
AC009237.17	0	0	0	0	0	0	0	0
AC009237.2	0	0	0	0	0	0	0	0
AC009237.4	0	0	0	0	0	0	0	0
AC009237.5	0	0	0	0	0	0	0	0
AC009237.6	0	0	0	0	0	0	0	0
AC009237.8	0	0.0917376	0.462877	0.413155	0.616334	0.341183	2.07543	0.898724
AC009238.6	0	0	0	0	0	0.681318	0	0.425058
AC009238.7	0	0	0	0	0	0	0	0
AC009238.8	0	0	0	0	0	0	0	0
AC009245.3	0	0	0	0	0	0	0	0
AC009262.2	0	0	0	0	0	0	0	0
AC009263.2	0	0	0	0.0764992	0	0	0.0734026	0
AC009274.6	0	0	0	0	0	0	0	0
AC009276.4	0	0	0	0	0	0	0	0
AC009297.1	0	0	0	0	0	0	0	0
AC009299.1	0	0	0	0	0	0	0	0
AC009299.2	0	0	0.0688214	0	0.0781616	0	0.100548	0
AC009299.3	0.813406	0.338661	2.35692	1.91399	0.713812	0.373191	3.82608	0.0388042
AC009299.4	0	0	0	0	0	0	0	0
AC009299.5	0	0	0	0	0	0	0	0
AC009302.2	0	0	0	0	0	0	0	0
AC009302.4	0	0	0	0	0	0	0	0
AC009303.1	0	0	0	0	0	0.23975	0.0491599	0
AC009303.3	0	0	0	0	0	0	0.258369	0
AC009305.1	0	0	0	0	0	0	0	0
AC009305.2	0	0	0	0	0	0	0	0
AC009310.1	0	0	0	0	0	0	0	0
AC009312.1	0	0	0	0	0	0	0	0
AC009313.1	0	0	0	0	0	0	0	0
AC009313.2	0	0	0	0	0	0	0	0
AC009336.1	0	0	0	0	0	0	0	0
AC009336.24	0	0.558527	0	0	0	0.263775	0	0
AC009362.2	0	0	0	0	0	0	0	0
AC009365.3	0	0	0	0	0	0	0	0
AC009365.4	0	0	0	0	0	0	0	0
AC009403.2	5.00558	8.45016	3.1069	6.0823	5.54487	2.37186	6.7007	13.6465
AC009404.2	1.15711	5.20178	0.168738	0.140142	0.0348433	1.05656	1.77051	0.204568
AC009410.1	3.06445	0	0	0	0	0	0.134535	1.36446
AC009411.1	0	0	0	0	0	0	0	0
AC009411.2	0	0	0	0	0	0	0	0
AC009413.2	0	0	0	0	0	0	0	0
AC009414.1	0	0	0	0	0	0	0	0
AC009469.1	52.6382	16.8624	10.5874	9.84081	20.0888	69.2776	0.807579	15.9399
AC009473.1	0	0	0.269865	0	0	0.854601	0.657123	0
AC009474.1	0	0	0	0	0	0	0	0
AC009474.2	0	0	0	0	0	0	0	0
AC009477.7	0	0	0	0	0	0	0	0
AC009478.1	0	0	0	0	0	0	0	0
AC009478.2	0	0	0	0	0	0	0	0
AC009480.1	0	0	0	0	0	0	0	0
AC009480.3	0	0	0	0	0	0	0	0
AC009480.4	0	0	0	0	0	0	0	0
AC009487.4	0	0	0	0	0	0	0	0
AC009487.5	0	0	0	0	0	0	0	0
AC009492.1	0	0	0	0	0	0	0	0
AC009494.3	0	0	0	0	0	0	0	0
AC009495.1	0	0	0	0	0	0	0	0
AC009495.2	0	0.803734	0	0	0	0.759158	0.350241	0
AC009495.3	0	0	0	0	0	0	0	0
AC009495.4	0	0.480882	0	0	0	0	0	0
AC009498.1	0	0	0	0	0	0	0	0
AC009499.1	0	0	0	0	0	0	0	0
AC009499.2	0	0	0	0	0	0	0	0
AC009500.2	0	0	0	0	0	0	0	0
AC009501.4	8.26013	1.00067	0.0267853	0.0815685	0	0	0.508733	0
AC009502.1	0	0	0	0	0	0	0	0
AC009502.4	0	0	0	0	0	0	0	0
AC009505.2	0	0	0	0	0	0	0.056453	0
AC009505.4	0	0	0	0	0	0	0	0
AC009506.1	1.94123	2.63423	0.708321	1.39573	0.66249	5.14591	2.80021	2.34607
AC009506.2	0	0	0	0	0	0	0	0
AC009508.1	0	0	0	0	0	0	0	0
AC009517.2	0	0	0	0	0	0	0	0
AC009518.2	0	0	0	0	0	0	0	0
AC009518.3	0	0	0	0	0	0	0	0
AC009518.4	0	0	0	0	0	0	0	0
AC009518.8	0	0	0	0	0	0	0	0
AC009531.2	0	0	0	0	0	0	0	0
AC009541.1	0	0	0	0	0	0	0	0
AC009542.2	0	0	0	0	0	0	0.0420267	0
AC009677.1	0	0	0	0	0	0	0	0
AC009695.1	0	0	0	0	0	0	0	0
AC009779.1	0	0	0	0	0	0	0	0
AC009784.1	0	0	0	0	0	0	0	0
AC009784.3	0	0	0	0	0	0.460221	0	0
AC009784.4	0	0	0	0	0	0	0	0
AC009800.1	0	0	0	0	0	0	0	0
AC009802.1	0	0	0	0	0	0	0	0
AC009831.1	0	0	0	0	0	0	0	0
AC009835.1	0	0	0	0	0	0	0	0
AC009878.2	0	0	0	0	0	0	0	0
AC009892.1	0	0	0	0	0	0	0	0
AC009892.10	0	0	0	0	0	0	0	0
AC009892.2	0	0	0	0	0	0	0	0
AC009892.5	0	0	0	0	0	0	0	0
AC009892.9	0	0	0	0	0	0	0	0
AC009941.1	0	0	0	0	0	0	0	0
AC009945.4	0	0	0	0	0	0	0	0
AC009947.2	0	0	0	0	0	0	0	0
AC009947.3	0	0	0	0	0	0	0	0
AC009947.5	0	0	0	0	0	0	0	0
AC009948.5	1.03553	11.5578	0.202258	0.355346	0.353397	3.06704	3.11412	1.01436
AC009948.7	0	0	0	0	0	0	0	0
AC009950.2	0.214531	0.521034	0.072523	0.110426	0.219642	0.516743	0.423825	0
AC009951.1	0	0.0301565	0.0209875	0	0	0.498469	0	0
AC009951.2	0	0	0	0	0	0	0	0
AC009955.8	0	0	0	0	0	0	0	0
AC009960.1	0	0	0	0	0	0	0	0
AC009960.2	0	0	0	0	0	0	0	0
AC009960.3	0	0	0	0	0	0	0	0
AC009960.4	0	0	0	0	0	0	0	0
AC009960.5	0	0	0	0	0	0	0	0
AC009960.6	0	0	0	0	0	0	0	0
AC009960.7	0	0	0	0	0	0	0	0
AC009961.2	0	0.11692	0	0	0	0.193263	0	0
AC009961.3	0	0.361191	0.0914081	0.0695907	0	0	0.600964	0.744943
AC009961.5	0	0	0	0	0	0	0	0
AC009963.3	0	0	0	0	0	0	0	0
AC009963.4	0	0	0	0	0	0	0	0
AC009963.5	0	0	0	0	0	0	0	0
AC009963.6	0	0	0	0	0	0	0	0
AC009965.1	0	0	0	0	0	0	0	0
AC009965.2	0	0	0	0	0	0	0	0
AC009967.3	0	0	0	0	0	0	0	0
AC009969.1	0	0	0	0	0	0	0	0
AC009970.1	0	0.207047	0	0	0	0	0	0
AC009974.11	0	0	0	0	0	0	0	0
AC009977.1	0	0	0	0	0	0	0	0
AC009987.1	0	0	0	0	0	0	0	0
AC009994.2	0	0	0	0	0	0	0	0
AC009997.1	0	0	0	0	0	0	0	0
AC010082.2	0	0	0	0	0	0	0	0
AC010084.1	0	0	0.111358	0	0	1.5869	0.976163	0
AC010086.1	0	0	0	0	0	0.421614	0	0
AC010086.5	0	0	0	0	0	0	0	0
AC010090.1	0	0	0	0	0	0	0	0
AC010091.1	0	0	0.0132107	0.0201151	0	0	0	0
AC010091.4	0	0	0	0	0	0	0	0
AC010092.1	0	0	0	0	0	0	0	0
AC010095.5	0	0	0	0	0	0	0.190662	0
AC010095.6	0	0	0	0	0	0	0	0
AC010095.7	0	0	0	0	0	0	0	0
AC010096.1	0	0	0	0	0	0	0	0
AC010096.2	0	0	0	0.125706	0	0	0	0
AC010105.1	0	0	0	0	0	0	0	0
AC010127.3	0	0	0.0648595	0	0.110493	0	0.497489	0.0961057
AC010132.10	0	0	0	0	0	0	0	0
AC010132.11	0	0	0	0	0	0.283501	0	0
AC010136.2	0	0	0.109593	0	0	0	0.320232	0
AC010139.1	0	0	0	0	0	0	0	0
AC010141.1	0	0	0	0	0	0	0	0
AC010141.4	0	0	0	0	0	0	0	0
AC010141.6	0	0	0	0	0	0	0	0
AC010141.8	0	0	0	0	0	0	0	0
AC010145.4	0	0	0	0	0	0	0	0
AC010146.1	0	0	0	0	0	0	0	0
AC010146.2	0	0	0	0	0	0	0	0
AC010148.1	0	0	0.0209381	0	0	0	0.305906	0.0310251
AC010149.4	0	0	0	0	0	0	0	0
AC010150.1	0	0	0	0	0	0	0	0
AC010150.2	0	0	0	0	0	0	0	0
AC010153.3	0	0	0	0	0	0	0	0
AC010154.2	0	0	0	0	0	0	0	0
AC010170.1	0	0	0	0	0	0	0	0
AC010196.1	0	0	0	0	0	0	0	0
AC010203.1	0	0	0	0	0	0	0	0
AC010207.1	0	0	0	0	0	0	0	0
AC010209.1	0	0	0	0	0	0	0	0
AC010226.4	0.453546	0.220306	0.562182	1.01164	0.696524	0.121384	2.24004	0
AC010235.1	0	0	0	0	0	0	0	0
AC010240.2	0	0.148455	0	0	0	0	0.0754737	0
AC010240.3	0	0	0	0	0	0	0	0
AC010243.1	0	0	0	0	0	0	0	0
AC010247.1	0	0	0	0	0	0	0	0
AC010295.1	0	0	0	0	0	0	0	0
AC010296.1	0	0	0	0	0	0	0	0
AC010297.1	0	0	0	0	0	0	0	0
AC010311.1	0	0	0	0	0	0	0	0
AC010319.1	0	0	0	0	0	0	0	0
AC010323.1	0	0	0	0	0	0	0	0
AC010327.1	0	0	0	0	0	0	0	0
AC010327.2	3.51916	9.08759	0.122017	0.216752	0.230961	0.627899	2.05007	2.92291
AC010329.1	0	0	0	0	0	0	0	0
AC010335.1	4.51913	1.52196	0.896254	2.35716	1.11043	6.1925	0	2.53532
AC010336.1	0	0.0943703	0	0.0400011	0	0.0311977	0.115146	0.253025
AC010368.1	0	0	0	0	0	0	0	0
AC010368.2	0	0	0	0	0	0	0	0
AC010376.1	0	0	0	0	0	0	0	0
AC010422.1	0	0	0	0	0	0	0	0
AC010423.1	0	0	0	0	0	0	0	0
AC010441.1	0.0699618	14.4996	1.35598	2.7849	1.57582	53.7758	15.2959	4.85952
AC010455.1	0	0	0	0	0	0	0	0
AC010458.1	0	0	0	0	0	0	0	0
AC010468.1	0	0	0	0	0	0	0	0
AC010468.2	0	0	0	0	0	0	0	0
AC010468.3	0	0	0	0	0	0	0	0
AC010492.2	0	0.397088	0	0.105197	0	0	0.100939	0
AC010492.4	0	0	0	0	0	0	0	0
AC010492.5	0	0	0	0	0	0	0	0
AC010504.2	0	0	0	0	0	0.505456	0.932778	0.630684
AC010518.3	0	0	0	0	0	0	0	0
AC010522.1	0	0	0	0	0	0	0	0
AC010524.2	0	0.0274116	0.0763088	0.0580953	0.476659	0.0906197	0.724668	0
AC010524.4	0	0	0	0	0	0	0	0
AC010525.1	0	0.535594	0	0	0	0.885305	0	0
AC010525.2	0	0	0	0	0	0	0	0
AC010525.4	0	0	0	0	0	0	0	0
AC010525.5	0	0	0	0	0	0	0	0
AC010525.6	0	0.333125	0	0	0	0	0.508077	0
AC010525.7	0	0	0	0	0	0	0	0
AC010528.1	0	0	0	0	0	0	0	0
AC010536.1	0.370396	0.651126	0	0.0726303	0	0.169938	0.0696903	0.28272
AC010543.1	0	0	0	0	0	0	0	0
AC010546.1	0	0	0	0	0	0	0	0
AC010547.9	0	0.559482	0	0	0	0	1.60769	0
AC010595.1	0	0	0	0	0	0	0	0
AC010609.1	0	0	0	0	0	0	0	0
AC010620.1	0	0	0	0	0	0	0	0
AC010641.1	0	0	0	0	0	0	0	0
AC010642.1	0	1.77746	0.0147265	0.179385	0	0.804461	2.34518	0
AC010642.2	0	0	0	0	0	0	0	0
AC010646.3	0	0	0	0	0	2.29664	0.176594	0
AC010649.1	0	0	0	0	0	0	0	0
AC010677.5	0	0	0	0	0	0	0	0
AC010723.1	0	0	0	0	0	0	0	0
AC010723.2	0	0	0	0	0	0	0	0
AC010724.1	0	0	0	0	0	0	0	0
AC010729.1	0	0	0	0	0	0	0	0
AC010729.2	0	0	0	0	0	0	0	0
AC010729.3	0	0	0	0	0	0	0	0
AC010731.2	0	0	0	0	0	0	0	0
AC010731.3	0	0	0	0	0	0	0	0
AC010731.4	0	0	0	0	0	0	0	0
AC010731.6	0	0	0	0	0	0	0	0
AC010733.4	0	0	0	0	0	0	0	0
AC010733.5	0	0	0	0	0	0	0	0
AC010733.7	0	0	0	0	0	0	0	0
AC010739.1	0	0	0	0	0	0	0	0
AC010740.1	0	0	0	0	0	0	0	0
AC010744.1	0	0	0	0	0	0	0	0
AC010745.1	0	0	0	0	0	0	0	0
AC010745.2	0	0	0	0	0	0	0	0
AC010745.3	0	0	0	0	0	0	0	0
AC010745.4	0	0	0	0	0	0	0	0
AC010746.3	0	0.197885	0	0	0	0	0	0
AC010747.2	0	0	0	0	0	0	0	0
AC010754.1	0	0	0	0	0	0	0	0
AC010760.1	0	0	0	0	0	0	0	0
AC010761.10	28.8721	9.97286	0	0	0	0	0	13.1768
AC010761.13	0	2.15096	0	0	0.850066	0	0.182256	0
AC010761.14	0	0	0	0	0	0	0	0
AC010761.6	0	0.593131	0	0.125706	0.937628	0.784329	0	0
AC010761.8	0	34.922	0.0692424	0.210862	0	1.15119	3.0349	1.6416
AC010761.9	0	2.23181	0	0	0	0	4.53856	0
AC010874.1	0	0	0	0	0	0	0	0
AC010877.1	0	0	0	0	0	0	0	0
AC010878.3	0	0	0	0	0	0	0	0
AC010880.1	0	0	0	0	0	0	0	0
AC010883.5	7.28693	0.449468	0	1.66703	0	0	2.05656	0.463505
AC010884.1	0	0	0	0	0	0	0	0
AC010884.2	0	0	0	0	0	0	0	0
AC010886.2	0	0	0	0	0	0	0	0
AC010887.1	0	0	0	0	0	0	0	0
AC010890.1	0	0	0.0768505	0.234031	0	0.91263	0.449115	0
AC010891.2	0	0	0	0	0	0	0	0
AC010894.3	9.42813	0.452309	2.3609	1.55774	0.715015	1.68219	6.20869	9.79513
AC010894.4	0	0	0	0	0	0	0	0
AC010894.5	0	0	0	0	0	0	0	0
AC010900.2	0	0	0	0	0	0	0	0
AC010904.1	0	0	0	0	0	0	0	0
AC010907.2	0	0	0.0898253	0	0	0.853368	0	0.399296
AC010907.5	5.134	0	0	0	0	0	0	0
AC010928.1	0	0	0	0	0	0	0	0
AC010930.1	0	0	0	0	0	0	0	0
AC010967.1	0	0	0	0	0	0	0	0
AC010967.2	0	0	0	0	0	0	0	0
AC010967.3	0	0	0	0	0	0	0	0
AC010969.1	0.171772	0	0.154848	0.0785925	0.175864	0	0	0
AC010970.1	0	0	0	0	0	0	0	0
AC010970.2	0	0	0	0	0	0	0	0
AC010971.1	0	0	0	0	0	0	0	0
AC010974.3	0	0	0	0	0	0	0	0
AC010975.1	0	0	0	0	0	0	0	0
AC010975.2	0	0	0	0	0	0	0	0
AC010976.2	0	0.293397	0	0.0444154	0.0662579	0	0.0426175	0
AC010980.2	0	0.522658	0	0	0	0.575949	0.141715	0.323388
AC010982.1	0	0.105976	0	0	0	0	0.215511	0
AC010982.2	0	0	0	0	0	0	0	0
AC010983.1	0	0	0	0	0	0	0.353875	0
AC010987.5	0	0	0	0	0	0	0	0
AC010987.6	0	0	0	0	0	0	0	0
AC010999.1	0	0	0	0	0	0	0	0
AC011073.1	0	0	0	0	0	0	0	0
AC011193.1	0	0	0	0	0	0	0	0
AC011196.3	0	0	0	0	0	0	0	0
AC011225.1	0	0	0	0	0	0	0	0
AC011233.2	0	0	0	0	0	0	0	0
AC011239.1	0	0	0	0	0	0	0	0
AC011242.5	0	0	0	0	0	0	0	0
AC011242.6	0	0	0	0	0	0	0	0
AC011243.1	0	0	0	0	0	0	0	0
AC011247.3	0	0	0	0	0	0	1.5613	0
AC011284.3	0	0	0	0	0	0	0	0
AC011286.1	0	0	0	0	0	0	0	0
AC011288.2	0	0	0	0	0	0	0.0919573	0
AC011290.4	0	0	0	0	0	0	0	0
AC011290.5	0	0	0	0	0	0	0	0
AC011293.1	0	0	0	0	0	0	0	0
AC011294.3	0	0	0	0	0	0	1.01015	5.55209
AC011298.1	0	0	0	0	0	0	0	0
AC011298.2	0	0	0	0	0	0	0.0267645	0
AC011306.1	0	0	0	0	0	0	0	0
AC011306.2	0	0	0	0	0	0	0.303153	0
AC011308.1	0	0	0	0	0	0	0	0
AC011313.1	0	0	0	0	0	0	0	0
AC011322.1	0	0	0	0	0	0	0	0.337866
AC011330.5	0	4.09203	0	0	0	0	1.48999	0
AC011343.1	0	0	0	0.0169043	0	0	0	0
AC011357.1	0	0	0	0	0	0	0	0
AC011363.1	0	0	0	0	0	0	0	0
AC011366.3	0	0	0	0	0	0	0	0
AC011379.1	0	0	0	0	0	0	0	0
AC011385.1	0	0.262492	0.0456705	0	0	0	0	0
AC011385.2	0	0	0	0	0	0	0	0
AC011406.2	0	0	0	0	0	0	0	0
AC011407.1	0	0	0	0	0	0	0	0
AC011410.1	0	0	0	0	0	0	0	0
AC011416.1	0	0	0	0	0	0	0	0
AC011431.1	0	0	0	0	0	0	0	0
AC011431.2	0	0	0	0	0	0	0	0
AC011450.1	0	0	0	0	0	0	0	0
AC011453.1	0	0	0	0	0	0	0	0
AC011456.1	0	0	0	0	0	0	0	0
AC011465.1	0	0	0	0	0	0	0	0
AC011467.1	0	0	0	0	0	0	0	0
AC011475.1	0	0	0	0	0	0	0	0
AC011477.1	0	0	0	0	0	0	0	0
AC011478.1	0	0	0	0	0	0	0	0
AC011484.1	0	0.269545	0	0	0	0.148514	0.59382	0
AC011495.1	0	0	0	0	0	0	0	0
AC011498.1	0	0	0	0	0	0	0	0
AC011499.1	0	0	0	0	0	0	0	0
AC011500.1	0	0	0	0	0	0	0	0
AC011513.4	0	0.15775	0	0	0	0	0	0
AC011515.2	0	0	0	0	0	0	0	0
AC011516.1	0	0	0	0	0	0	0	0
AC011516.2	0	0	0	0	0	0	0	0
AC011518.1	0	0	0	0	0	0	0	0
AC011518.2	0	0	0	0	0	0	0	0
AC011523.2	0	0	0	0	0	0	0	0
AC011524.1	0	0	0	0	0.263304	0	0	0
AC011524.2	0	0	0	0	0	0	0	0
AC011524.3	0	0	0	0	0	0	0	0
AC011525.2	0	0	0	0	0	0	0	0
AC011525.4	0	0	0	0	0	0	0	0
AC011526.1	3.87575	0.276346	0.625054	1.39099	1.41977	1.18003	0.889789	0.712442
AC011530.4	0.160774	0.312378	0	0	0	0	0	0
AC011551.3	1.79781	0	0	0.112169	0	0	0	0
AC011558.5	0	0	0	0	0	0	0	0
AC011591.1	0	0	0	0	0	0	0	0
AC011625.1	0	0	0	0	0	0	0	0
AC011626.1	0	0	0	0	0	0	0	0
AC011648.1	0	0	0	0	0	0	0	0
AC011652.1	0	0	0	0	0	0	0	0
AC011652.2	0	0	0	0	0	0	0	0
AC011718.1	2.49087	0	0.68611	0	0.850066	0	0	0
AC011718.2	0	0	0	0	0	0	0	0.0783666
AC011718.3	0	0	0	0	0	0	0	0
AC011737.2	10.0377	6.05261	0.468037	1.18775	0	0	0.227934	2.77406
AC011738.1	0	0	0	0	0	0	0	0
AC011738.4	0	0	0	0	0	0.101403	0	0
AC011742.3	0	0	0	0	0	0	0	0
AC011742.5	0	0	0	0	0	0	0	0
AC011747.3	0	0.086336	0.0600858	0	0	0	0	0
AC011747.4	0	0.0898836	0.0834063	0.116414	0	0.0495241	0.0203095	0
AC011747.6	0	0	0	0.167757	0.500511	0	0	0
AC011747.7	1.4749	0.086839	0	0.046011	0.137276	0	0.353188	0
AC011748.1	0	0	0	0	0	0	0	0
AC011752.1	0	0	0	0	0	0	0	0
AC011753.5	0	0	0	0	0	0	0	0
AC011753.6	0	0	0	0	0	0	0	0
AC011754.1	0	0	0	0	0	0	0	0
AC011755.1	0	0	0	0	0	0	0	0
AC011816.1	0	0	0	0	0	0	0	0
AC011891.5	0	0	0	0	0	0	0	0
AC011893.3	0.59336	0	0	0	0	0	0.0976862	0
AC011897.1	0.134868	0	0	0.0462805	0.0690402	0	0.31085	0
AC011897.2	0	0	0	0	0	0	0	0
AC011899.10	0	0	0	0	0	0	0	0
AC011899.9	0.148117	0	0.146877	0.0609926	0.272962	1.99792	2.04833	0.514409
AC011901.2	0	0	0	0	0	0	0	0
AC011933.1	25.3909	2.07345	17.4158	18.7141	37.5243	86.7458	1.09048	124.31
AC011933.2	0	0	0	0	0	0	0	0
AC011994.1	0	0	0	0	0	0	0	0
AC011995.1	0	0	0	0	0	0	0	0
AC011995.3	0	0	0	0	0	0	0	0
AC011997.1	0	0	0	0	0	0	0	0.0893774
AC011998.1	0	0	0	0	0	0	0	0
AC011998.2	0	0	0	0	0	0	0	0
AC011998.4	0	0	0	0	0	0	0	0
AC011999.1	0	0	0	0	0	0	0	0
AC012003.1	0	0	0	0	0	0	0	0
AC012005.2	0	0	0	0	0	0	0	0
AC012047.1	0	0	0	0	0	0	0	0
AC012050.1	0	0	0	0	0	0	0	0
AC012065.4	0	0	0	0	0	0	0	0
AC012065.5	0	0	0	0	0	0	0	0
AC012065.7	0	0	0	0	0	0	0	0
AC012066.1	0	0	0	0	0	0	0	0
AC012067.1	0	0	0	0	0	0	0	0
AC012074.1	0	0	0	0	0	0	0	0
AC012074.2	0	0	0	0	0	0	0	0
AC012075.1	0	0	0	0	0	0	0	0
AC012075.2	0	0	0	0	0	0	0	0
AC012078.2	0	0	0	0	0	0	0	0
AC012119.1	0	0	0	0	0	0	0	0
AC012123.1	0	0	0	0	0	0	0	0.222125
AC012146.7	5.80814	0	0.509045	1.66091	3.3036	2.41804	7.33091	34.8046
AC012150.1	0	0	0	0	0	0	0	0
AC012175.1	0	0	0	0	0	0	0	0
AC012181.1	0	0	0	0	0	0	0	0
AC012215.1	0	0.244748	0	0	0	0	0.0452467	0
AC012305.1	0	0	0	0	0	0	0	0
AC012306.2	0	0	0	0	0	0	0	0
AC012307.2	0	0	0	0	0	0	0	0
AC012309.5	0	0	0	0	0	0	0	2.44617
AC012313.1	0	0	0	0	0	0	0	0
AC012314.19	0	0	0	0	0	0	0	0
AC012314.20	0	0	0	0	0	0	0.221819	0
AC012314.8	0	1.03254	0	0.0227952	0	0.142228	0.481195	0.0221831
AC012317.1	0	0	0	0	0	0	0	0
AC012322.1	0	0	0	0	0	0	0	0
AC012353.1	0	0	0	0	0	0	0	0
AC012354.6	0	0.0333125	0	0	0	0	0	0.274823
AC012354.8	0	0	0	0	0	0	0	0
AC012358.4	0	1.30985	0.260456	0.132193	0.0986013	0.721703	0.380526	0.0643218
AC012358.7	0	0.781171	0	0	0	0	0	0
AC012358.8	1.64302	0.118234	0.555427	0.626454	0.560718	0.293151	0.270493	0.457225
AC012360.1	0	0	0	0	0	0	0	0
AC012360.2	0	0	0	0	0	0	0	0
AC012360.4	0	0	0.0923575	0	0	0	0	0
AC012360.6	0	0	0	0	0	0.170003	0.069717	0
AC012361.1	0	0	0	0	0	0	0	0
AC012362.1	0	0	0	0	0	0	0	0
AC012362.3	0	0	0	0	0	0	0	0
AC012363.10	0	0	0	0	0	0	0	0
AC012363.13	0	0	0	0	0	0	0	0
AC012363.4	0	0	0	0	0	0	0	0
AC012363.7	0	0	0	0	0	0	0	0
AC012363.8	0	0.232021	0	0	0	0	0.117958	0.598168
AC012365.3	0	0	0	0	0	0	0	0
AC012368.1	0	0	0	0	0	0	0	0
AC012370.2	0	0	0	0	0	0	0	0
AC012370.3	0	0.0813868	0	0	0	0	0	0
AC012379.1	0	1.19715	0.83316	0.543686	0	0	3.30396	0
AC012391.1	0	0	0	0	0	0	0	0
AC012414.1	0	0	0	0	0	0	0.133547	0
AC012441.1	0	0	0	0	0	0	0	0
AC012442.5	0	0	0	0	0	0	0.855961	0
AC012442.6	2.34961	0	0	0.358346	1.60372	0	0	1.91798
AC012445.1	0	0	0	0	0	0	0	0
AC012451.1	0	0	0	0	0	0	0	0
AC012454.4	0	0	0	0	0	0	0	0
AC012456.3	0	0	0	0	0	0	0	0
AC012456.4	0	0	0	0	0	0	0	0
AC012457.2	0	0	0	0	0	0	0	0
AC012462.1	0	0	0	0	0	0	0	0
AC012462.2	0	0	0	0	0	0	0	0
AC012462.3	0	0	0	0	0	0	0	0
AC012467.1	0	0	0	0	0	0	0	0
AC012485.1	0	0	0	0	0	0	0	0
AC012485.2	0	0	0	0	0	0	0.807689	0
AC012487.2	0	0	0	0	0	0.555116	0	0.346323
AC012493.1	0	0	0	0	0	0	0	0
AC012493.2	0	0	0	0	0	0	0	0
AC012494.1	0	0	0	0	0	0	0	0
AC012497.2	0	0	0	0	0	0	0	0
AC012499.1	0	0	0	0	0	0	0	0
AC012501.1	0	0	0	0	0	0	0	0
AC012501.2	0	0	0	0	0	0	0	0
AC012501.3	0	0	0	0	0	0	0	0
AC012506.1	0	0	0	0	0	0	0	0
AC012506.2	0	0	0	0	0	0	0	0
AC012506.3	0	0	0	0	0	0	0	0
AC012506.4	0	0	0	0	0	0	0	0
AC012507.3	0	0	0	0	0	0	0	0
AC012507.4	0	0	0	0	0	0.49282	0	0
AC012512.1	0	0	0	0	0	0	0	0
AC012513.4	0	0	0	0	0	0	0	0
AC012513.6	0	0	0	0	0	0	0	0
AC012531.23	0	0	0	0	0	0	0	0
AC012531.25	0	0	0	0	0	0	0	0
AC012564.1	0	0	0	0	0	0	0	0
AC012593.1	0	0	0	0	0	0	0	0
AC012594.1	0	0	0	0	0	0	0	0
AC012603.1	0	0	0	0	0	0	0	0
AC012613.2	0	0.0197318	0	0.0209095	0.0311922	0	0.240757	0
AC012615.1	33.6881	16.9336	6.42131	11.3877	13.8992	6.63872	2.86965	41.3054
AC012627.1	0	0	0	0	0	0	0	0
AC012667.1	0	0	0	0	0	0	0	0
AC012668.1	0	0	0	0	0	0	0	0
AC012668.2	0	0	0	0.233685	0.139442	0	0.0448451	0.181928
AC012668.3	0	0	0	0	0	0	0	0
AC012671.1	0	0	0	0	0	0	0	0
AC012671.2	0	0	0	0	0	0	0	0
AC012671.3	0	0	0	0	0	0	0	0
AC012671.4	0	0	0	0	0	0	0	0
AC013248.2	0	0	0	0	0	0	0	0
AC013262.1	0	0	0	0	0	0	0	0
AC013264.2	0	0	0	0	0	0	0.799524	0
AC013267.1	0	0	0	0	0	0	0	0
AC013268.1	0	0	0	0	0	0	0	0
AC013268.3	0	0	0	0	0.0608409	0	0.156533	0
AC013268.4	0	0	0	0	0	0	0	0
AC013269.1	0	0	0	0	0	0	0	0
AC013269.3	0	0	0	0	0	0	0	0
AC013269.4	0	0	0	0	0	0	0	0
AC013269.5	0	0	0	0	0	0	0	0
AC013271.3	1.93066	1.45208	1.30533	1.00446	0	1.00009	0.287089	0.270369
AC013275.1	0	0	0	0	0	0	0	0
AC013275.2	0	0	0.0893953	0	0	0	0.696569	0.176616
AC013283.1	0	0	0	0	0	0	0	0
AC013394.2	24.6093	18.0541	4.15086	12.1921	6.68907	53.856	45.5241	18.3062
AC013399.3	0	0	0	0	0	0	0	0
AC013401.1	0	0	0	0	0	0	0	0
AC013401.2	0	0	0	0	0	0	0	0
AC013402.1	0	0	0	0	0	0	0	0
AC013402.3	0	0	0	0	0	0	0	0
AC013402.4	0	0	0	0	0	0	0	0
AC013402.5	0	0	0	0	0	0	0	0
AC013403.13	0	0	0	0	0	0	0	0
AC013404.1	0	0	0	0	0	0	0	0
AC013406.1	0	0	0	0	0	0	0	0
AC013410.1	0	0	0	0	0	0	0	0
AC013410.2	0	0	0	0	0	0	0	0
AC013429.4	0	0	0	0	0	0	0	0
AC013429.5	0	0	0	0	0	0	0	0
AC013436.6	0	0	0	0	0	0	0	0
AC013437.2	0	0	0	0	0	0	0	0
AC013437.4	0	0	0	0	0	0	0	0
AC013437.6	0	0	0	0	0	0	0	0
AC013437.7	0	0	0	0	0	0	0	0
AC013439.4	0	0	0	0	0	0	0.146805	0.0744451
AC013442.1	0	0	0	0	0	0	0	0
AC013444.1	0	0	0	0	0	0	0	0
AC013444.2	0	0	0	0	0	0	0	0
AC013448.1	0	0	0	0	0	0	0	0
AC013448.2	0	0	0	0	0	0	0	0
AC013449.1	0	0	0	0	0	0	0	0
AC013460.1	0	0	0	0	0	0	0.0561567	0
AC013463.2	0	0	0	0	0	0	0	0
AC013467.1	0	0	0	0	0	0	0	0
AC013468.1	0	0	0	0	0	0	0	0
AC013469.1	0	0	0	0	0	0	0	0
AC013470.6	0	0	0	0	0	0	0	0
AC013470.8	0	0	0	0	0	0	0	0
AC013472.3	0	0	0	0	0	0	0	0
AC013472.4	0	0	0	0	0	0	0	0
AC013474.4	0	0	0	0	0	0	0	0
AC013476.1	0	0	0	0	0	0	0	0
AC013477.1	0	0	0	0	0	0	0	0
AC013480.2	0	0	0	0	0	0	0	0
AC013489.1	0	0	0	0	0	0	0	0
AC013558.1	0	0	0	0	0	0	0	0
AC013717.3	0	0	0	0	0	0	0	0
AC013718.1	0	0	0	0	0	0	0	0.678217
AC013727.1	0	0	0	0	0	0	0	0
AC013727.2	0	0	0	0	0	0	0	0
AC013731.1	0	0	0	0	0	0	0	0
AC013733.3	0	0	0	0	0	0	0	0
AC013733.4	0	0	0	0	0	0	0	0
AC013733.5	0	0	0	0	0	0	0	0
AC013737.1	0	0	0	0	0	0	0	0
AC013751.1	0	0	0	0	0	0	0	0
AC015600.1	0	0	0	0	0	0	0	0
AC015660.1	0	0	0	0	0	0	0	0
AC015688.3	0.945922	0.245052	0	0	0.968454	3.24046	0.872083	3.03247
AC015691.13	0	0	0	0	0	0	0	0
AC015726.1	0	0	0	0	0	0	0	0
AC015815.1	0	0	0	0	0	0	0	0
AC015815.2	0	0	0	0	0	0	0	0
AC015815.3	0	0	0	0	0	0	0	0
AC015815.4	0	0	0	0	0	0	0	0
AC015815.5	0	0	0	0	0	0	0	0
AC015815.6	0	0	0	0	0	0	0	0
AC015815.7	0	0	0	0	0	0	0	0
AC015815.8	0	0	0	0	0	0	0	0
AC015818.3	0	0	0	0	0	0	0	0.105414
AC015818.6	0	0	0	0	0	0	0	0
AC015820.1	0	0	0	0	0	0	0	0
AC015849.12	0	0	0	0	0	0	0	0
AC015849.13	0	0	0	0	0	0	0	0
AC015849.14	0	0	0	0	0	0	0	0
AC015849.16	0	0	0.0433111	0.0164868	0.0491892	0	0.0474582	0
AC015849.19	0	7.33149	0	0	0	1.21185	1.11819	0
AC015849.2	0	0.270224	0	0	0	0	0	0
AC015871.1	0	0	0	0	0	0	0	0
AC015884.1	0	0	0	0	0	0	0	0
AC015922.5	0	0	0	0	0	0	0	0
AC015922.6	0	0	0	0	0	0	0	0.48495
AC015922.7	0	0	0	0	0	0	0	0
AC015923.1	0	0	0	0	0	0	0	0
AC015933.2	0	0	0	0	0	0	0	0
AC015936.3	0	0	0	0	0.280544	3.2268	0	2.01312
AC015969.3	0	0	0	0	0	0	0	0
AC015971.1	0	0	0	0	0	0	0	0
AC015971.2	0	0.594209	0	0.0662815	0	0.568638	1.55816	0
AC015977.5	0	0	0	0	0	0	0	0
AC015977.6	0	0	0	0	0	0	0	0
AC015987.1	0	0	0.154848	0	0	0.183888	0	0.688339
AC015987.2	1.32079	9.08876	25.6735	25.0978	72.0071	76.7951	8.2085	31.922
AC015989.1	0	0	0	0	0	0	0	0
AC015989.2	0	0	0	0	0	0	0	0
AC016113.1	0	0	0	0	0	0	0	0
AC016178.1	0	0	0	0	0	0	0	0
AC016178.2	0	0	0	0	0	0	0	0
AC016194.1	0	0	0	0	0	0	0	0
AC016251.1	0	0	0	0	0	0	0	0
AC016292.1	0	0	0	0	0	0	0	0
AC016292.3	0	0	0	0	0	0	0	0
AC016405.1	0	0	0	0	0	0	0	0
AC016405.2	0	0	0	0	0	0	0	0
AC016543.1	0	0	0	0	0	0	0	0
AC016553.1	0	0	0	0	0	0	0	0
AC016559.1	0	0	0	0	0	0	0	0
AC016561.1	0	0	0	0	0	0	0	0
AC016575.1	0	0	0	0	0	0	0	0
AC016582.2	0	0	0	0	0	0	0	0.168624
AC016586.1	0	0.0882092	0	0.046737	0	0	0.0896901	0
AC016597.1	0	0	0	0	0	0	0	0
AC016626.1	0	0	0	0	0	0	0	0
AC016626.2	0	0	0	0	0	0	0	0
AC016629.3	0	0.399304	0	0.0846273	0	0	0	0
AC016629.7	0	0	0	0	0	0	0	0
AC016629.8	0.232656	1.68763	0.167787	0.415153	0.142919	0.946453	1.10312	0.279696
AC016644.1	0	0	0	0	0	0	0.209553	0
AC016670.1	0	0	0	0	0	0	0	0
AC016682.1	0	0	0	0	0	0	0	0
AC016683.5	0	0.166563	0	0	0	0	0	0
AC016691.2	0	0	0	0	0	0	0	0
AC016694.2	0	0	0	0	0	0	0	0
AC016696.1	0	0	0	0	0	0	0	0
AC016697.1	0	0	0	0	0	0	0	0
AC016697.2	0	0	0	0	0	0	0	0
AC016697.3	0	0	0	0	0	0	0	0
AC016700.2	0	0	0	0	0	0.660027	0	0
AC016700.3	0	0.0933655	0	0	0	1.08029	0.189866	0.481406
AC016700.4	0	0	0	0	0	0	0	0
AC016700.5	6.88437	3.64802	2.72692	2.57717	1.28152	0	1.23642	6.40925
AC016700.6	0	0	0	0	0	0	0	0
AC016706.1	0	0	0	0	0	0	0	0
AC016708.2	0	0	0	0	0	0	0	0
AC016710.1	0	0.575821	0	0	0	0	0.195163	0.593804
AC016712.1	0	0	0	0	0	0	0	0
AC016712.2	0	0	0	0	0	0	0	0
AC016716.1	0	0	0	0	0	0	0	0
AC016716.2	0	0	0	0	0	0	0	0
AC016717.1	0	0	0	0	0	0	0	0
[truncated: 55,774 more rows]
