# Supplementary material for: Phospholipase A2 Group IIA Is Associated with Inflammatory Hepatocellular Adenoma
Source: Cancers (Basel). 2023 Dec 28;16(1):159. doi: 10.3390/cancers16010159 (PMC10778238; doi:10.3390/cancers16010159)
Supplement: Supplementary file 1 [file cancers-16-00159-s001.zip › Supplementary_Data_S2.xlsx]

## Sheet: Supplemental data(TPM)
Gene	Normal region	Border region	HCC region	HCA1	HCA2
5S_rRNA_1	0	0	0	0	0
5S_rRNA_2	0	0	0	0	0
5S_rRNA_3	0	0	0	0	0
5S_rRNA_4	0	0.0862177	0	0	0
5S_rRNA_5	0	0	0	0	0
5S_rRNA_6	0	0	0	0	0
5S_rRNA_7	0	0	0	0	0
7SK_1	0.396248	0.143384	0.46273	0	0
7SK_2	0	0	0	0	0
7SK_3	0	0	0	0	0
7SK_4	0	0	0	0	0
7SK_5	0	0	0	0	0
7SK_6	0	0	0	0	0
7SK_7	0	0	0	0	0
A1BG	799.216	269.431	390.57	1030.75	164.219
A1BG-AS1	1.62892	0.767485	1.28796	2.52178	1.02478
A1CF	26.7381	13.9468	16.1557	31.3083	6.48267
A2M	1423.24	1417.04	2144.95	536.562	50.8447
A2M-AS1	9.96799	12.1539	25.8957	6.3148	2.61748
A2ML1	0	0	0	0	0.0367428
A2ML1-AS1	0	0	0	0	0
A2ML1-AS2	0	0	0	0	0
A2MP1	0.0814108	0.147294	0.138643	0.177932	1.11397
A3GALT2	0	0	0	0	0
A4GALT	0.676328	3.72924	3.44754	2.67481	2.49216
A4GNT	0	0	0	0.311925	0
AAAS	5.97831	16.3489	17.81	14.5848	33.8712
AACS	0.20619	1.58814	1.58803	0.214595	1.94577
AACSP1	0	0.0760362	0.32718	0	0
AADAC	603.869	317.271	191.221	102.171	19.519
AADACL2	0	0.0507258	0	0	0
AADACL3	0	0	0	0	0
AADACL4	0	0.108881	0	0	0
AADAT	15.8342	1.98467	1.08296	3.75259	1.71027
AAED1	5.87013	6.31121	7.14811	2.28383	1.65315
AAGAB	7.24531	12.035	11.1898	16.1416	53.5778
AAK1	0.076202	0.206805	0.35842	0.370105	1.10262
AAMDC	18.7809	18.402	28.8153	31.6297	10.5878
AAMP	38.173	74.8341	67.4428	42.8054	85.7078
AANAT	0.0432797	0	0	0	0
AAR2	10.6367	20.157	22.9032	9.93142	31.8722
AARD	0	0.0355487	0.0764822	0	0
AARS	22.1468	43.253	48.3949	25.8831	63.5932
AARS2	1.94064	6.02478	6.78154	2.15286	22.5379
AARSD1	7.98384	19.5608	31.1526	8.76204	35.4009
AASDH	1.79644	2.56695	2.48324	0.981575	7.62866
AASDHPPT	5.2427	6.42071	5.56438	3.35043	40.809
AASS	4.21164	1.23264	1.14518	12.3635	0.70137
AATF	11.6383	53.4001	69.0212	14.703	86.0063
AATK	0.167487	0.371899	0.222259	0.510266	0.287371
AATK-AS1	0.0525694	0.095112	0	0	0
AB015752.3	0	0	0	0	0
AB019438.66	0	0	0	0	0
AB019440.1	0	0	0	0	0
AB019440.50	0	0	0	0	0
AB019441.29	0	0	0	0	0
ABAT	45.8933	10.9291	6.9481	62.0932	19.3685
ABC12-47043100G14.2	0	0	0	0	0
ABC7-42389800N19.1	6.7292	21.3297	34.8746	13.8333	14.8171
ABC7-43041300I9.1	0	0	0	0	0
ABCA1	5.53664	8.57435	10.5403	8.40796	3.04977
ABCA10	0.473631	0.193828	0.0548706	1.82387	0.0319253
ABCA11P	0.74816	2.24194	1.95669	1.49892	8.69289
ABCA12	0	0	0	0	0
ABCA13	0.015304	0	0	0.0743297	0
ABCA17P	0	0	0	0	0
ABCA2	2.42969	2.71953	4.02357	7.89649	12.4357
ABCA3	0.121454	0.285665	0.177289	0.725563	0.0458453
ABCA4	0.043734	0.207707	0.159599	0.159309	0.0619062
ABCA5	3.09676	2.05873	1.98338	5.85536	1.20971
ABCA6	11.8487	1.19972	0.44323	10.0717	0.960745
ABCA7	0.419241	3.53634	3.6057	2.41043	2.30962
ABCA8	9.12981	4.83062	6.7268	17.6875	0.24555
ABCA9	0.76747	0.300229	0	3.11298	0.283825
ABCA9-AS1	0	0.163945	0	0	0
ABCB1	14.0501	10.5017	8.38976	3.80584	1.73991
ABCB10	6.9038	6.54761	6.32832	8.0799	128.198
ABCB10P1	0	0	0	0	0
ABCB10P3	0	0	0	0	0
ABCB10P4	0	0	0	0	0
ABCB11	6.20107	0.432796	1.55788	10.7245	2.72621
ABCB4	30.3294	8.29517	6.25255	17.5073	5.8961
ABCB5	0	0.407552	0.398563	0	0
ABCB6	5.66328	12.5032	23.5511	13.1339	2.16522
ABCB7	13.1801	14.1436	14.9857	9.06327	36.2663
ABCB8	4.34382	5.81172	7.14078	5.36803	4.88452
ABCB9	0.0145405	0.184154	0.176876	0.233052	0.370483
ABCC1	0.58809	2.99961	1.77778	2.98999	20.7935
ABCC10	0.234523	2.70501	2.24802	0.820119	10.8887
ABCC11	0.19621	0.33133	0.114565	0	0.0123439
ABCC12	0	0	0	0	0
ABCC13	0	0	0	0	0.00834211
ABCC2	17.2774	8.36522	10.0052	15.4459	4.765
ABCC3	11.9988	3.46589	2.54257	21.8338	5.01401
ABCC4	0.446201	2.01824	1.39407	0.239527	22.9816
ABCC5	0.323094	3.65727	3.25705	2.28142	11.4766
ABCC5-AS1	0	0	0	0	0
ABCC6	21.3038	18.8071	19.1943	43.4831	5.40759
ABCC6P1	12.5143	19.6428	19.383	45.5653	3.46723
ABCC6P2	4.61717	14.2643	10.258	6.72752	2.5485
ABCC8	0	0	0	0	0
ABCC9	3.56026	0.495497	0.064609	6.61442	0.642187
ABCD1	2.28392	9.54056	10.895	5.77475	18.4255
ABCD1P2	0.0592021	0	0.460899	0	0
ABCD1P3	0	0	0	0	0
ABCD1P4	0	0	0	0	0
ABCD1P5	0	0	0	0	0
ABCD2	0.0455831	0.343634	0.133077	0.110696	0.0430158
ABCD3	26.288	21.5113	21.3846	13.0199	24.6441
ABCD4	5.90162	7.19662	7.20523	6.59891	4.88582
ABCE1	8.92605	9.99086	6.27185	5.24643	128.348
ABCF1	11.7352	43.6016	55.6932	22.4729	88.139
ABCF2	4.85846	14.1492	12.6702	5.52667	60.3667
ABCF2P1	0	0	0	0	0
ABCF2P2	0	0	0	0	0
ABCF3	7.90006	20.8472	18.5644	9.7339	25.8696
ABCG1	2.30611	4.76041	3.64492	2.86403	0.481982
ABCG2	21.154	3.30735	1.40792	8.14726	0.221396
ABCG4	0.045365	0	0.0147156	0.462699	0
ABCG5	18.4469	15.4891	19.6377	43.399	9.2089
ABCG8	17.6406	20.3017	30.6997	54.7755	8.62557
ABHD1	0.913017	0.361351	0.555313	3.15953	1.29239
ABHD10	22.9662	27.3607	22.5022	23.8175	44.1447
ABHD11	6.54244	8.91522	9.38896	5.61107	10.863
ABHD12	18.0222	47.9103	50.463	33.1467	19.0157
ABHD12B	0.0213282	0	0	0.65261	0.100635
ABHD13	6.85389	4.99554	2.97206	3.00115	23.2575
ABHD14A	10.4265	21.6123	30.0002	17.8836	9.21945
ABHD14A-ACY1	0.0875994	0.633963	0	0	0.206664
ABHD14B	79.88	41.6918	35.2492	167.989	68.8445
ABHD15	11.5576	7.61474	6.72779	20.6465	5.95132
ABHD16A	13.1459	23.2476	21.1438	13.1687	19.9004
ABHD16B	0.960634	4.8279	6.90742	4.6657	0.805803
ABHD17A	6.65439	23.688	22.1166	18.177	23.472
ABHD17AP1	0	0	0	0.147864	0.383058
ABHD17AP2	0	0	0	0.148022	2.49255
ABHD17AP3	0	0	0.0811236	0.121464	0.0786668
ABHD17AP4	0	0	0	0	0
ABHD17AP5	0	0	0	0	7.85121
ABHD17AP6	0	0	0	0	0
ABHD17B	5.34934	6.46191	4.48875	4.99398	15.4766
ABHD17C	2.71778	2.67136	1.70386	4.56922	9.02579
ABHD2	18.9107	6.46495	6.49987	22.6948	26.1372
ABHD3	8.9225	19.4032	12.7603	5.02946	12.4148
ABHD4	5.38226	13.0114	13.553	10.4121	12.4826
ABHD5	4.06382	2.59501	1.2213	3.43955	7.72626
ABHD6	20.0974	13.0682	10.0487	33.4391	13.4328
ABHD8	9.09226	19.5542	18.9483	12.1857	4.61386
ABI1	8.05518	18.3389	11.4317	8.11805	31.7573
ABI2	0.583717	1.52137	1.60085	3.36638	2.88902
ABI3	4.82403	15.9198	9.57677	12.5959	2.07586
ABI3BP	1.08787	0.859153	0.0672162	1.44671	0.47256
ABL1	1.55555	3.08764	2.10165	4.73112	18.9834
ABL2	0.586269	1.97914	1.71854	1.00008	9.92474
ABLIM1	1.70918	4.36057	4.51329	9.31797	24.1574
ABLIM2	0.36045	0.439492	0.259265	0.548034	0.62114
ABLIM3	6.83023	4.39649	6.10997	26.0095	4.82175
ABO	0.0298951	0.0405662	0	0.413813	0
ABR	0.420932	2.53371	1.20526	1.65126	14.1626
ABRA	0	0	0	0	0
ABRACL	24.1696	42.3716	18.6781	13.9256	154.738
ABT1	15.8041	48.4802	42.7851	11.4526	42.3223
ABT1P1	0	0	0	0	0
ABTB1	4.82076	9.82274	11.6458	11.3105	3.77892
ABTB2	1.77253	0.965541	0.259667	4.24895	3.25546
AC000003.1	0	0	0	0	0
AC000003.2	0	0	0	0	0
AC000029.1	0	0	0	0	0
AC000032.2	0.965199	1.39704	2.62999	5.0629	0.728669
AC000036.4	0	0	0	0	0
AC000041.8	0	0	0	0	0
AC000067.1	0	0	0	0	0
AC000068.10	0	0	0	0	0
AC000068.5	0	0.122666	0	0	0.213267
AC000068.9	0	0	0	0	0
AC000077.2	0	0	0	0	0
AC000078.5	0	0	0	0	0
AC000081.2	0	0	0	0	0
AC000089.3	0	0	0	0	0
AC000095.9	0	0	0	0	0
AC000099.1	0	0	0	0	0
AC000110.1	0	0	0	0	0
AC000111.3	0	0	0	0	0
AC000111.4	0	0	0	0	0
AC000111.5	0	0	0	0	0
AC000111.6	0	0	0	0	0
AC000120.7	0	0	0	5.12786	0.281448
AC000123.4	0.734749	0.498508	0	0	2.77346
AC000124.1	0	0	0	0	0
AC000362.1	0	0	0	0	0
AC000367.1	0	0	0	0	0
AC000370.2	0	0	0	0	0
AC000374.1	0	0	0	0	0
AC000403.1	0	0	0	0	0
AC002044.4	0	0	0	0	0
AC002056.3	0	0	0.121047	0	0
AC002056.5	0	0	0	0	0
AC002059.10	0	0	0	0	0
AC002064.4	0	0	0	0	0
AC002064.5	0	0	0	0	0
AC002066.1	0.078139	0	0	0	0
AC002066.2	0	0	0	0	0
AC002069.5	0	0	0	0	0
AC002069.6	0	0	0	0	0
AC002070.1	0	0	0	0	0
AC002075.3	0	0	0	0	0
AC002075.4	0	0	0	0	0
AC002076.10	0.179853	0.325402	0	0	0
AC002115.5	0	0	0	0	0
AC002115.9	0	0	0	0	0
AC002116.7	0.147407	2.00024	1.29104	2.3626	2.64298
AC002116.8	0	4.32511	2.44878	0	0
AC002117.1	0	0.492779	0	2.38111	0
AC002127.2	0	0	0	0	0
AC002127.4	0	0	0	0	0
AC002128.5	0	0	0	0	0
AC002306.1	0	0	0	0	0
AC002310.10	0	0	0	0	0
AC002310.12	1.29697	1.97111	3.78643	0.377955	1.8114
AC002310.13	0	0	0	0	0
AC002310.17	0	0	0	0	0
AC002310.7	0.0494174	0.0447046	0	0	0.23317
AC002314.4	0	0	0	0	0
AC002331.1	1.28956	3.20809	0	0	0
AC002365.1	0.147636	0	0	0	0
AC002366.3	0	0	0	0	0
AC002368.4	0	0	0	0	0
AC002383.2	0	0	0	0	0
AC002386.1	0	0	0	0	0
AC002395.1	0	0	0	0	0
AC002398.11	0.418158	1.05078	0.859075	2.09865	1.09613
AC002398.12	0	12.8615	7.12744	122.829	75.4854
AC002398.13	0.221973	1.20483	1.94412	2.58744	4.81783
AC002398.5	0.0761918	0	0.185365	0.943641	0
AC002398.9	4.93564	16.6195	34.2444	3.19625	6.12395
AC002400.1	0	0	0	0	0
AC002401.1	0	0	0	0	0
AC002429.4	0	0	0	0	0
AC002429.5	0	0	0	0	0
AC002451.1	0	0	0	0	0
AC002451.3	0.636125	0.986502	3.89113	3.44269	0
AC002454.1	0	0.899856	2.21259	0	0
AC002456.2	1.69255	0.69597	0.598945	0	2.61363
AC002463.3	0	0	0	0	0
AC002465.2	0	0	0	0	0
AC002467.7	1.54118	2.17844	4.87434	0.982452	3.18145
AC002472.1	0	0	0	0	0
AC002472.11	0	0	0	0	0
AC002472.13	0	0	0	0	0
AC002477.1	0	0	0	0	0
AC002480.2	0	0	0	0	0
AC002480.3	0.0779462	0	0.0758532	0.283932	0
AC002480.4	0	0	0	2.72738	0
AC002480.5	0	0.133765	0	0	0.0697692
AC002485.1	0	0	0	0	0
AC002486.2	0	0	0	0	0
AC002486.3	0	0	0	0	0
AC002511.1	0	0.0208774	0.112293	0	0
AC002511.2	0	0	0	0	0
AC002511.3	0	0	0	0	0
AC002519.6	0	0	0	0	0
AC002519.8	0	0	0	0	0
AC002523.1	0	0	0	0	0
AC002539.1	0	0	0	0	0
AC002539.2	0	0	0	0	0
AC002542.2	0	0	0	0	0
AC002543.2	0	0	0	0	0
AC002550.5	0	0	0	0	0
AC002551.1	0	0	0	0	0
AC002553.1	0	0	0	0	0
AC002553.4	0	0	0	0	0
AC002558.1	0	0	0	0	0
AC002978.1	0	0	0	0	0
AC002979.1	0	0	0	0	0
AC002981.1	0	0	0	0	0
AC002984.2	0	0	0	0	0
AC002985.3	0	0	0.40396	0	0.130575
AC002992.1	0	0	0	0	0
AC002994.1	0	0	0	0	0
AC003001.1	0	0	0	0	0
AC003002.4	0	0	0	0	0
AC003002.6	0	0	0	0	0.221762
AC003003.5	0.0398079	0.0360115	0	0	0
AC003005.2	0	0	0	0	0.134705
AC003005.4	0	0	0	0	0.296664
AC003006.1	0	0	0	0	0
AC003006.7	0	0	0	0	0
AC003009.1	0	0	0	0	0
AC003009.2	0	0	0	0	0
AC003029.1	0	0	0	0	0
AC003035.1	0	0	0	0	0
AC003043.1	0	0	0	0	0
AC003045.1	0	0	0	0	0
AC003051.1	0	0.0205472	0	0	0
AC003075.4	1.47453	1.17384	0.516576	1.89067	1.44714
AC003079.1	0	0	0	0	0
AC003080.4	0	0	0	0	0
AC003084.2	0	0	0	0	0
AC003088.1	0	0	0	0	0
AC003090.1	0.0638697	0.0577786	0	0	0.210953
AC003092.1	0	0	0	0	0
AC003092.2	0	0	0	0	0
AC003101.1	0	0	0	0	0
AC003102.1	0	0.0598349	1.09423	0	0
AC003102.3	0	0	0	0	0.0662181
AC003104.1	0	0	0	0	0.395188
AC003658.1	0	0	0	0	0
AC003664.1	0	0	0	0	0
AC003665.1	0.449384	0.813055	1.20262	0.163696	0.530092
AC003666.1	0	0	0	0	0
AC003681.1	0	0	0	0	0
AC003682.16	0	0	0	1.79357	0.580806
AC003682.17	0	0	0	0	0
AC003956.1	0	0	0	0	0
AC003958.2	0	0	0	0	0
AC003958.6	0	0	0	0	0
AC003968.1	0	0	0	0	0
AC003973.1	0	0	0	0	0
AC003973.4	0	0	0	0	0
AC003973.5	0	0	0	0	0
AC003973.6	0	0	0	0	0
AC003984.1	0	0	0	0	0
AC003985.1	0	0	0	0	0
AC003986.5	0	0	0	0	0
AC003986.6	0	0	0	0	0
AC003986.7	0	0	0	0	0
AC003988.1	0	0	0	0	0
AC003989.3	0	0	0	0	0
AC003989.4	0	0	0	0	0
AC003991.3	0	0	0	0	0.0316616
AC004000.1	0	0	0	0	0
AC004004.2	0	0	0	0	0
AC004006.2	0	0	0	0	0
AC004009.3	0	0	0	0	0
AC004012.1	0.709982	0.802841	0.690917	0	0
AC004014.3	0	0	0	0	0
AC004014.4	0	0	0	0	0
AC004016.1	0	0	0	0	0
AC004016.2	0	0	0	0	0
AC004017.1	0	0	0	0	0
AC004019.10	0	0	0	0	0
AC004019.13	0	0.139951	0	1.20222	0.437975
AC004019.18	0	0	0	0	0
AC004022.7	0	0	0	0	0
AC004022.8	0	0	0	0	0
AC004041.2	0.0876804	0	0	0	0.082742
AC004051.2	0	0	0	0	0
AC004052.1	0	0	0	0	0
AC004053.1	0	0	0	0	0
AC004054.1	0	0	0	0	0
AC004057.1	0	0.301914	0	0.486284	0
AC004062.2	0	0	0	0	0
AC004063.1	0	0	0	0	0
AC004066.2	0	0	0	0	0
AC004066.3	0	0	0	0	0
AC004067.5	0	0	0	0	0
AC004069.1	0	0	0	0	0
AC004069.2	0	0.624725	0	0.251557	1.30338
AC004070.1	0	0	0	0	0
AC004074.3	0	0	0	0	0
AC004074.4	0	0	0	0	0
AC004076.7	0	0	0	0	1.37342
AC004076.9	0	0	0	0	0.261024
AC004079.1	0	0	0	0	0
AC004112.4	0	0	0	0	0
AC004112.5	0	0	0	0	0
AC004112.7	0	0	0	0	0
AC004125.3	0	0	0	0	0
AC004129.7	0	0	0	0	0
AC004129.9	0	0	0	0	0
AC004156.3	0	0	0	0	0.0475261
AC004158.2	0	0	0	0	0.555554
AC004158.3	0	0	0	0	0
AC004159.1	0	0	0	0	0
AC004160.4	0.841763	0	0	3.67952	0.953223
AC004166.6	0.0928937	0.0280116	0	0	0.233764
AC004221.2	0	0	0	0	0
AC004231.2	0	0	0	0	0
AC004237.1	0	0	0	0	0
AC004257.1	0	0	0	0	0
AC004257.3	0	0	0	0	0
AC004381.6	0.438061	5.10998	4.26298	0.638285	7.15814
AC004381.7	0	0	0	0	0.254827
AC004383.3	0	0	0	0	0
AC004386.3	0	0	0	0	0
AC004386.4	0	0	0	0	0
AC004410.3	0	0	0	0	1.60541
AC004447.2	1.29463	13.2732	10.1171	9.54614	33.7267
AC004448.2	0	0	0	0	0
AC004448.5	0	0	0	0	0
AC004449.6	0	0	0	0	0
AC004453.8	0	0	0	0	0
AC004458.1	0	0	0	0	0
AC004460.1	0	0	0	0	0
AC004461.4	0	0	0	0	0
AC004463.6	0	0	0	0	0
AC004466.1	0	0.396227	0.340989	0	1.07465
AC004471.10	0.0626041	0	0	0	0
AC004471.9	0.162857	0.441977	0	0	1.22947
AC004485.3	0	0	0	0	0
AC004490.1	0	0.0313161	0	0	0.130671
AC004492.1	0	0	0	0	0
AC004510.3	0	0	0	0	0
AC004520.1	0	0	0	0	0
AC004528.1	0	0	0	0	0
AC004528.4	0	0	0	0	0
AC004535.2	0	0	0	0	0
AC004538.3	0.389714	0.0371103	0	2.03227	0.445188
AC004540.4	7.84482	0.874933	0	2.03556	2.33244
AC004540.5	0.0228337	0.144593	0.199985	0	0.0646428
AC004543.1	0	0	0	0	0
AC004543.2	0	0	0	0	0
AC004549.6	0	0	0	0	0.312378
AC004552.1	0	0	0	0	0
AC004562.1	0	0	0	0	0
AC004593.3	0	1.07448	0.577929	0	0
AC004595.1	0	0	0	0	0
AC004603.4	0	0	0	0	0
AC004623.2	0	0	0	25.3914	0
AC004637.1	0	0	0	0	0
AC004655.1	0	0	0	0	0
AC004656.1	0	0	0	0	0
AC004673.1	0	0	0	0	0
AC004691.5	0	0	0	0	0
AC004692.4	0	0	0	0	0
AC004692.5	0	0	0	0	0
AC004699.1	0	0	0	0	0
AC004702.2	0	0	0	0	0
AC004706.1	1.461	3.6346	2.96203	2.48358	0.402125
AC004744.3	0	0	0	0	0
AC004745.1	0	0	0	0	0
AC004769.1	0	0	0	0	0
AC004771.1	0	0	0	0	0.401095
AC004775.5	0	0	0	0	0
AC004791.2	0	0	0	0	0
AC004797.1	0	0	0	0	0
AC004812.1	0	0	0	0	0
AC004817.1	0	0	0	0	0
AC004824.1	0	0	0	0	0
AC004824.2	0	0	0	0	0
AC004832.1	0.135597	0	0	0	0.38388
AC004837.3	0	0	0	0	0
AC004837.4	0	0	0	0	0
AC004837.5	0	0.586481	1.2618	0	0
AC004840.8	0	0	0	0	0
AC004840.9	0.0917103	0.20741	0	0.267256	4.15415
AC004851.1	0	0	0	0	0
AC004854.4	0	0	0	0	0
AC004854.5	0	0	0	0	0
AC004862.6	7.58541	0.825984	0.205048	9.72208	1.35873
AC004866.1	0	0	0	0	0
AC004866.3	0	0	0	0	0
AC004869.2	0	0	0	0	0
AC004869.3	0	0	0	0	0
AC004870.3	0	0	0	0	0
AC004870.4	0	0	0	0	0
AC004870.5	0	0	0	0	0
AC004875.1	0	0	0	0	0
AC004878.2	0	0	0	0	0
AC004878.3	1.90461	4.35812	6.54167	1.4692	4.22904
AC004878.5	0	0	0	0	0
AC004878.6	0	0	0	0	0
AC004878.7	0	0	0	0	0
AC004878.8	0	0	0	0	0
AC004889.1	0	0	0	0	0
AC004893.10	0	0	0	0	0
AC004893.11	0.225996	0.183999	0.351884	0.263433	0.917048
AC004895.1	0	0	0	0	0
AC004895.4	0	0	0	0	0
AC004899.1	0	0	0	0	0
AC004899.3	0	0	0	0	0
AC004901.1	0	0	0	0	0
AC004906.3	0	0	0	0	0
AC004911.2	0	0	0	0	0
AC004917.1	0	0	0	0	0
AC004920.2	0	0	0	0	0
AC004920.3	0	0	0	0	0
AC004924.1	0	0	0	0	0
AC004938.5	0	0	0	0	0
AC004941.3	0	0	0	0	0
AC004941.5	0	0	0	0	0
AC004943.1	0	0	0	0	0
AC004945.1	0	0	0	0	0
AC004947.2	0	0	0	0.446941	0.0321626
AC004951.5	0.359934	0.434144	0	0	0.11322
AC004951.6	0	0.321653	0.692028	0.0740111	1.00661
AC004967.7	1.27225	2.49366	3.71426	0	2.80138
AC004969.1	0	0	0	0	0
AC004980.1	0	0	0	0	0
AC004980.10	0	0	0	0	0
AC004980.11	0	0	0	0	0.389226
AC004980.7	0.548581	0.551405	1.03804	0.488473	3.5375
AC004980.8	0	0	0	0	0
AC004980.9	0.259678	1.17457	0	0	0.245052
AC004985.12	0	0	0	0.354114	0.152896
AC004987.10	0	0	0	0	0
AC004987.9	0.054756	0	0	0.159566	0.103344
AC004988.1	0	0.871475	0.104164	0	0
AC005000.1	0	0	0	0	0
AC005000.2	0	0	0	0	0
AC005003.1	0	0.0954827	0	0	1.09564
AC005007.3	0	0	0	0	0
AC005008.2	0	0	0	0	0
AC005008.3	0	0	0	0	0
AC005009.1	0	0	0	0	0
AC005009.2	0	0	0	0	0
AC005013.1	0.112613	0.203747	0.219178	0.546949	0.0531351
AC005013.5	0	0	0	0	0
AC005014.5	0	0	0	0	0
AC005017.2	0	0	0	0	0
AC005019.2	0	0	0	0	0
AC005019.3	0	0	0	0	0
AC005020.1	0	0	0	0	0
AC005022.1	0	0	0	0	0
AC005027.3	0	0	0	0	0
AC005029.1	0	0	0	0	0
AC005033.6	0	0	0	0	0
AC005034.2	0	0	0	0	0
AC005034.3	0	0	0	0	0
AC005037.1	0	0	0	0	0
AC005037.2	0	0	0	0	0
AC005037.3	0	0.0881228	0.663579	0	0
AC005037.4	0	0	0	0	0
AC005037.6	0	0	0	0	0
AC005040.3	0	0	0	0	0
AC005041.11	0	0	0	0	0
AC005041.17	0	0	1.11939	0	0.434195
AC005042.2	0	0	0	0	0
AC005042.3	0	0	0	0	0
AC005042.4	0.0203527	0.0368235	0	0.177932	0.460953
AC005042.5	0	0	0	0	0
AC005048.1	0	0	0	0	0
AC005062.2	0	0	0	0	0.244192
AC005071.1	0	0	0	0	0
AC005076.5	0.640423	1.35181	4.15484	3.11047	2.31668
AC005077.12	0.0367945	0	0	1.39391	0.104166
AC005077.14	0	0	0	0	0
AC005077.5	0	0	0	0	0
AC005077.7	0.30042	0	0	0.875465	0.708749
AC005077.8	0	0	0	0	0
AC005077.9	0	0	0	0	0
AC005082.1	0	0	0	0	0
AC005082.12	0	0	0	0	0
AC005083.1	0.210394	0.380659	0	0	1.09199
AC005086.1	0	0	0	0	0
AC005086.2	0	0	0	0	0
AC005086.3	0	0	0	0	0
AC005086.4	0	0	0	0	0
AC005088.1	0	0	0	0	0
AC005094.2	0	0	0	0	0
AC005102.1	0	0	0	0	0
AC005104.3	0	0.19399	0	0	2.42835
AC005105.2	0	0	0	0	0
AC005150.1	0	0.273068	0.734375	0	0
AC005152.3	0	0.317568	0.683241	0	0
AC005154.6	0.141897	0.54956	0.491933	2.17737	1.90396
AC005154.7	0	0	0	0	0
AC005154.8	0	0	0	0	0
AC005159.1	0	0	0	0	0
AC005160.3	0	0	0	0	0
AC005161.1	0	0	0	0	0
AC005162.4	0	0	0	0	0
AC005162.5	0	0	0	0	0
AC005176.1	0	0	0	0	0
AC005176.2	0	0	0	0	0
AC005176.3	0	0	0	0	0
AC005178.1	0	0	0	0	0
AC005189.6	0	0	0	0	0
AC005195.1	0	0	0	0	0
AC005197.2	0.138774	0	0	0	0
AC005215.1	0	0	0	0	0
AC005220.3	0.10722	0	0	0	0
AC005224.2	0.246669	0.44629	0.180034	0	0.640134
AC005229.1	0	0	0	0	0
AC005229.5	0	0	0	0	0
AC005229.7	0	0	0	0	0
AC005235.1	0	0	0	0	0
AC005237.2	0	0	0	0	0
AC005237.4	0	0	0	0	0
AC005253.2	0.0473676	0.299952	0.230478	0	8.35885
AC005253.4	0	0	0	27.1734	0
AC005255.3	0	0	0	0	0
AC005255.5	0	0	0	0	0
AC005255.6	0	0	0	0	0
AC005256.1	0	0	0	0	0
AC005262.2	0	0	0	0	0
AC005262.3	0	0	0	0	0
AC005262.4	0	0	0	0	0.247083
AC005264.2	0	0	0	0.119107	0.11571
AC005276.1	0	0.102441	0	0	0.106863
AC005280.1	2.69706	9.20174	6.44912	3.08771	14.6165
AC005281.1	0	0	0	0	0
AC005281.2	0	0	0	0	0
AC005284.1	0	0	0	0	0
AC005288.1	0	0	0	0	0
AC005300.5	0	0	0	0	0
AC005301.8	0	0	0	0	0
AC005304.1	0	0	0	0	0
AC005306.3	0	0.778307	0	0	2.16506
AC005307.1	0	1.2015	1.645	0	0
AC005307.3	0	0.107206	0.369042	0	0
AC005324.6	0	0	0	0	0
AC005324.7	0	0	0	0	0
AC005326.2	0	0	0	0	0
AC005329.7	0.159254	1.00846	1.49812	4.21546	2.00379
AC005330.2	0.150928	0.682671	2.20312	0	0
AC005336.4	0	0	0	0	0
AC005336.5	0	0	0	0	0
AC005339.2	13.5404	48.1213	69.6487	200.463	8.6706
AC005351.1	0	0	0	0	0
AC005355.1	0	0	0	0	0
AC005355.2	3.59609	5.03462	3.99946	1.1228	2.74715
AC005356.1	3.90281	1.26093	1.08515	0	0
AC005357.1	0	0	0	0	0
AC005358.1	0	0	0	0	0
AC005358.3	0	0	0	0	0
AC005363.9	0	0	0	0	0
AC005370.1	0	0	0	0	0
AC005375.1	0	0	0	0	0
AC005387.2	0	0	0	0	0.609846
AC005387.3	0	0.487179	0	1.96171	0.254103
AC005391.2	0	0	0	0	0.542086
AC005392.13	0	0	0	0	0
AC005394.1	0	0	0	0	0
AC005399.1	0	0	0	0	0
AC005477.1	0	0	0	0	0
AC005481.5	0	0	0	0	0
AC005484.5	0	0	0	0	0
AC005487.2	0	0	0	0	0
AC005488.1	0	0	0	0	0
AC005488.11	0	0	0	0	0.19112
AC005493.1	0	0	0	0	0
AC005498.3	0	1.02424	0.314804	0	0.457905
AC005498.4	0	0	0	0	0
AC005513.1	0	0	0	0	0
AC005517.3	0	0	0	0	0
AC005518.2	0	0	0	0	0
AC005519.4	0	0	0	0.40411	2.09379
AC005522.6	0	0	0	0	0
AC005522.7	0	0	0	0	0
AC005523.2	4.96202	13.4424	15.7775	11.9082	31.651
AC005523.3	0	0.205128	0	0	0
AC005532.5	0	0	0	0	0
AC005534.6	0	0	0	0	0
AC005534.8	0.127739	0.231114	0.372928	0	0.361634
AC005537.2	0	0.101592	0	0	0
AC005538.5	0	0	0	0	0
AC005539.2	0	0	0	0	0
AC005540.3	0	0	0	0	0.486638
AC005544.1	0	0	0	0	0
AC005546.2	0	0	0	0	2.05882
AC005549.1	0	0	0	0	0
AC005549.2	0	0	0	0	0
AC005549.3	0	0	0	0	0
AC005550.3	0	0.0916307	0	0	0
AC005550.4	0	0	0	0	0
AC005550.5	0	0	0	0	0
AC005559.2	0	0	0	0	0
AC005559.3	0	0	0	0	0
AC005562.1	0.478539	1.35643	0.527781	2.09179	3.79332
AC005588.2	0	0	0	0	0
AC005592.1	0	0	0	0	0.039984
AC005592.2	0	0.0473459	0	0	0
AC005592.3	0	0	0	0	0
AC005594.3	0	0.0279204	0	0	0.436881
AC005597.1	0	0	0	0	0
AC005606.1	0	0	0	0	0
AC005606.14	0	0	2.63895	0	0
AC005606.15	0	6.97516	22.6933	67.1342	2.8395
AC005609.1	0	0	0	0	0
AC005609.2	0	0	0	0	0
AC005614.3	0	0	0	0	0
AC005614.5	0	0	0	0	0
AC005616.1	0	0	0	0	0
AC005616.2	0	0	0	0	0
AC005618.1	0.339115	0	0	0	1.44007
AC005618.6	0	0	0	0	0
AC005621.1	0	0	0	0	0
AC005624.2	0	0	0	0	0
AC005625.1	0	0	0	0	0
AC005626.3	0	0	0	0	0
AC005631.1	0	0	0	0	0
AC005682.5	0.270807	2.13484	2.78595	0	6.5349
AC005682.6	0.193829	1.05207	4.21262	0	0.0609708
AC005682.7	0	0	0	0	0
AC005682.8	0	0	0	0	0
AC005686.1	0	0	0	0	0
AC005701.1	0	0	0	0	0
AC005702.1	0	0	0	0	0
AC005702.2	0	0	0	0	0
AC005702.3	0	0	0	0	0
AC005702.4	0	0	0	0	0
AC005703.2	0	0	0	0	0
AC005703.3	0	0	0	0	0
AC005722.4	0	0	0	0	0
AC005725.1	0	0	0	0	0
AC005730.2	0	0	0	0	0
AC005740.3	0	0	0	0	0
AC005740.4	0	0	0	0	0
AC005740.5	0	0	0	0	0
AC005740.6	0	0	0	0	0
AC005741.2	0	0	0	0	0
AC005754.7	0	0	0	0	0
AC005754.8	0	0	0	0	0
AC005757.6	0	0	0	0	0
AC005757.7	0	0	0	0	0
AC005758.1	0	0	0	3.09354	0
AC005772.2	0	0	0	0	0
AC005775.2	0	0.309916	1.44468	0	0.754348
AC005776.1	0	0	0	0	0
AC005777.3	0	0	0	0	0
AC005779.1	0	0	0	0	0
AC005779.2	0	0	0	0	0.162626
AC005780.1	0	0	0	0	0
AC005783.1	0	0	0	0	0
AC005785.2	0	0	0	0	0
AC005786.3	0	0	0	0	0
AC005786.5	0	0	0	0	0
AC005786.7	4.69719	47.1968	110.522	76.9964	25.3293
AC005789.11	0	0	0	0	0
AC005789.9	0	0	0	0	0
AC005794.1	0	0	0	0	0
AC005795.1	0	0	0	0	0
AC005808.3	0	0	0	0	0
AC005822.1	0	0	0	0	0
AC005831.1	0	0	0	0	0
AC005838.2	0	0	0	0	0
AC005841.1	0	0	0	0	0.476273
AC005863.1	0	0	0	0	0
AC005863.2	0	0	0	0	0
AC005884.1	0	0	0	0	0
AC005926.1	0	0	0	0	0
AC005932.1	0	0.806365	0	0	0
AC005943.4	0	0	0	0	0
AC005943.5	0	0	0	0	0
AC005944.2	9.74714	17.3311	52.3333	236.296	47.2595
AC005954.3	0	0	0	0	0
AC005954.4	0	0	0	0	0.321741
AC006000.5	0	0	0	0	0
AC006001.1	0	0	0	0	0
AC006003.3	0	0	0	0	0
AC006004.1	0	0	0	0	0
AC006007.1	0	0	0	0	0
AC006011.4	0	0	0	0	0
AC006014.1	0	0	0	0	0
AC006014.10	0	0	0	0	0.232021
AC006014.7	0	0	0	0	1.88123
AC006014.8	0.168953	0.534941	0	2.33867	1.99296
AC006019.3	0	0	0	0	0
AC006019.4	0	0	0	0	0
AC006022.4	0	0	0	0	0
AC006023.8	0	0.0579348	0	0	0
AC006024.4	0	0	0	0	0
AC006026.1	0	0	0	0	0
AC006026.10	0	0	0	0	0
AC006026.12	0	0	0	0	0
AC006026.13	0	0	0	0	0
AC006026.9	0	0	0	0	0
AC006028.11	0	0	0	0	0
AC006033.22	0	0	0	0	0
AC006035.1	0	0	0	0	0
AC006037.2	0	0	0	0	0
AC006041.1	0	0	0	0	0
AC006042.6	0	0	0	0	0
AC006042.7	0	0.301914	0	0	0.157472
AC006042.8	0.0645218	0.0583686	0	0	0.182663
AC006045.3	0	0	0	0	0
AC006050.2	0	2.39909	4.07765	0	0
AC006070.12	0	0	0	0	0
AC006076.1	0	0	0	0	0
AC006077.4	0	0	0	0	0
AC006080.1	0	0	0	0	0
AC006111.1	0	0	0	0	2.76631
AC006115.1	0	0	0	0	0
AC006115.3	0.0315626	0.542499	0.337866	0	0
AC006115.6	0	0	0	0	0
AC006116.1	0	0	0	0	0
AC006116.12	0.209696	0	0	2.74987	0
AC006116.13	0	0	0	0	0
AC006116.14	0	0	0	0	0
AC006116.15	0	0	0	0	0
AC006116.17	0	0	0	0	0.0867547
AC006116.19	0	0	0	0	0
AC006116.20	0.128374	0	0	0.561148	0.121143
AC006116.21	0	0.247337	0	0	0
AC006116.22	0	0.0789898	0	0	0.164798
AC006116.24	0	0	0	0	0
AC006116.27	0	0	0	0	0
AC006126.3	0	0	0	0	0
AC006126.4	0.206049	0.186399	0	0	0.583331
AC006129.1	0	0	0	0	0.0923056
AC006129.2	0.921497	2.44131	0.896753	0	0.062114
AC006129.4	0.252417	3.65352	3.93023	0	0.1191
AC006130.1	0	0	0	0	0
AC006130.3	0	0	0	0	0
AC006130.4	0	0	0	0	0
AC006133.3	0	0	0	0	0
AC006145.1	0	0	0	0	0
AC006150.1	0	0	0	0	0
AC006150.2	0	0	0	0	0
AC006153.3	0	0	0	0	0
AC006156.1	0	0	0	0	0
AC006156.2	0	0	0	0	0
AC006159.3	0.100725	1.54903	1.76437	0	0
AC006159.4	0	0.123907	0.399873	0	0
AC006159.5	0	0	0	0	0
AC006160.5	0	0	0	0	0
AC006195.2	0	0	0	0	0
AC006196.1	0	0	0	0	0
AC006227.1	0	0	0	0	0
AC006262.10	0	0	0	0	0
AC006262.4	0	0	0	0	0
AC006262.5	0	0	0	0	0
AC006262.6	0	0.0305899	0	0.739055	0
AC006272.1	0	0	0	0	0.211452
AC006272.2	0	0	0	0	0
AC006273.4	0	0	0	0	0
AC006273.5	0.435782	0	0	0	0
AC006273.7	0	0	0	0	0
AC006277.2	0.244285	0.110494	0.713176	0	0
AC006296.1	0	0	0	0	0
AC006296.2	0	0	0	0	0
AC006322.1	0	0	0	0	0
AC006326.3	0	0	0	0	0
AC006326.5	0	0	0	0	0
AC006328.1	0	0	0	0	0
AC006328.9	0	0	0	0	0
AC006335.10	0	0	0	0	0
AC006335.11	0	0	0	0	0
AC006335.2	0	0	0	0	0
AC006335.6	0	0	0	0	0
AC006355.3	0	0	0	0	0
AC006366.3	0	0	0	0	0
AC006369.2	0	0	0	0	0
AC006369.3	0	0	0	0	0
AC006371.1	0	0	0	0	0
AC006372.1	0	0	0	0	0
AC006372.4	0	0	0	0	0.0220904
AC006372.5	0	0	0	0	0
AC006372.6	0	0	0	0	0
AC006373.1	0	0	0	0	0
AC006377.1	0	0	0	0	0
AC006378.2	0	0	0	0	0.140635
AC006380.1	0	0	0	0	0
AC006380.3	0	0	0	0	0
AC006390.4	0	0	0	0	0
AC006427.2	0	0	0	0	0
AC006432.1	0	0	0	0	0
AC006435.1	0	0	0	0	0
AC006445.6	0	0	0	0	0
AC006445.7	0	0	0	0	0.568501
AC006449.1	0	0	0	0	0
AC006452.1	0	0	0	0	0
AC006455.1	0	0	0	0	0
AC006458.3	0	0	0	0	0
AC006460.2	0	0	0	0	0.0795059
AC006461.2	0	0	0	0	0
AC006465.4	0	0	0	0	0
AC006466.5	0	0	0	0	0
AC006480.1	0	0	0	0	0
AC006482.1	0	0	0	0	0
AC006483.1	0	0	0	0	0
AC006483.5	0	0	0	0	0
AC006486.1	0.0431026	0.233952	0.545288	0	0.935523
AC006486.9	0	0	0	0	0
AC006487.1	0	0	0	0	0
AC006499.1	0	0	0	0	0
AC006499.2	0	0	0	0	0
AC006499.3	0	0	0	0	0
AC006499.4	0	0	0	0	0
AC006499.5	0	0	0	0	0
AC006499.6	0	0	0	0	0
AC006499.7	0	0	0	0	0
AC006499.8	0	0	0	0	0
AC006499.9	0	0	0	0	0
AC006509.4	0	0	0	0	0
AC006509.7	0	0	0	0	0
AC006534.1	0	0	0	0	0
AC006534.2	0	0	0	0	0
AC006538.1	0	0	0	0	0
AC006538.4	0	0	0	0	0
AC006539.1	0	0	0	0	0
AC006539.2	0	0.684579	0	0	0
AC006539.3	0	0.599605	0	0	0
AC006539.4	0	0	0	0	0
AC006547.13	0.0527449	0.190859	0	0	1.89142
AC006547.14	0	0.0600865	0.258549	0	0
AC006547.15	0	0	0	0	0
AC006547.8	0	1.30408	1.75356	0	0
AC006548.19	0	0	0	0	0
AC006548.26	0	0	0	0	0
AC006552.1	0	0	0	0	0
AC006557.1	0	0	0	0	0
AC006926.1	0	0	0	0	0
AC006942.4	1.27592	1.48402	0.709519	5.04613	0.344016
AC006946.12	0	0	0	0	0
AC006946.15	0	0	0	0	0.132118
AC006946.16	0	0	0	0	0
AC006946.17	0	0	0	0	0
AC006947.1	0	0	0	0	0
AC006953.1	0	0	0	0	0
AC006960.5	0	0	0	0	0
AC006960.7	0	0	0	0	0
AC006967.1	0	0	0	0	0
AC006978.6	0	0	0	0	0
AC006987.4	0	0	0	0	0
AC006987.5	0	0	0	0	0
AC006987.6	0	0	0	0	0
AC006987.7	0	0	0	0	0
AC006988.1	0	0	0	0	0
AC006989.2	0	0	0	0	0
AC006994.1	0	0	0	0	0
AC006994.2	0	0.169453	0	0	1.94444
AC006994.3	0	0	0	0	0
AC006995.8	0	0	0.15341	0	0
AC007000.10	0	0	0	0	0
AC007000.11	0	0	0	0	0
AC007000.12	0.099457	0	0	0	0
AC007003.1	0	0	0	0	0
AC007009.1	0.441877	0.599605	1.93505	0	0.833978
AC007009.2	0	0	0	0	0
AC007016.3	0	0	0	0	0
AC007025.1	0	0	0	0	0
AC007036.4	0	0	0	0	0
AC007036.5	0	0	0	6.74778	0
AC007036.6	0	0.381647	0	0	0.132706
AC007038.7	0.0431026	0.350928	0.461397	0	4.63694
AC007040.1	0	0	0	0	0
AC007040.11	0	0	0	0.0620556	0.0200953
AC007040.2	0	0	0	0	0
AC007040.3	0	0	0	0	0
AC007040.6	0	0	0	0	0
AC007040.7	0	0.301118	0	0	0
AC007040.8	0	0	0	0	0
AC007041.1	0	0	0	0	0
AC007041.2	0	0	0	0	0
AC007050.1	0	0	0	0	0
AC007050.17	0	0	0	0	0
AC007050.18	0	0	0	0	0
AC007056.1	0	0	0	0	0
AC007064.22	0	0	0	0	0
AC007064.24	0	0	0	0	0
AC007064.25	0	0	0	0	0
AC007078.4	0	0	0	0	0
AC007091.1	0	0	0	0	0
AC007096.1	0	0	0	0	0
AC007098.1	0	0	0	0	0
AC007099.1	0	1.66422	1.01189	0	0
AC007099.2	0	0	0	0	0
AC007106.1	0	0	0	0	0
AC007114.1	0	0	0	0	0
AC007115.3	0	0	0	0	0
AC007126.1	0	0	0	0	0
AC007128.1	0	0	0	0	0
AC007131.1	0	0.210568	0.181213	0	0
AC007131.2	0	0	0	0	0
AC007131.3	0	0	0	0	0
AC007136.1	0	0	0	0	0
AC007161.5	0	0	0	0	0.0602317
AC007163.10	0	0	0	0	0
AC007163.11	0	0	0	0	0
AC007163.3	0	0.0836522	0	0	0
AC007163.6	0	0	0	0	0
AC007163.8	0	0	0	0	0
AC007163.9	0	0	0	0	0
AC007179.1	0	0	0	0	0
AC007179.2	0	0	0	0	0
AC007182.6	0.0439011	0.0397144	0	0	0.165714
AC007192.6	4.91313	34.4455	64.7455	116.927	1.35229
AC007193.10	0	0	0	0.292595	0
AC007193.6	0	0	0	0	0
AC007193.8	0	0	0	0	0
AC007193.9	0	0	0	0	0
AC007204.1	0	0	0	0	0
AC007204.2	0	0	0	0	0
AC007216.1	0	0	0	0	0
AC007216.2	0	0	0	0	0
AC007228.11	0.231742	0.377355	0.631455	0	0
AC007228.5	0	0	0	0	0
AC007228.8	0	0	0	0	0
AC007228.9	0	0	0	0	0
AC007229.3	0	0	0	0	0
AC007237.2	0	0	0	0	0
AC007238.1	0	0	0	0	0
AC007241.1	0	0	0	0	0
AC007242.1	0	0	0	0	0
AC007246.3	1.57479	0.992136	0.602054	1.2907	0.822658
AC007248.6	0	0	0	0	0
AC007248.7	0	0	0	0	0
AC007249.3	0	0.17357	0	0.838692	0
AC007250.4	0	0	0	0	0
AC007251.2	0	0	0	0	0
AC007253.1	0	0	0	0	0
AC007255.8	0	0	0	0	0
AC007256.5	0	0	0	0	0
AC007271.3	0	0	0	0	0
AC007272.1	0	0	0	0	0
AC007272.3	0	0.154493	0	0	0
AC007274.2	0	0	0	0	0
AC007274.5	0	0	0	0	0
AC007277.3	0	0.0287826	0.185775	0	0
AC007278.2	0	0	0	0	0.0745368
AC007278.3	0	0.0646145	0	0	0
AC007279.2	0	0	0	0	0
AC007282.6	0	0	0	0	0
AC007283.4	0	0	0	0	0
AC007283.5	1.27797	3.66096	9.94921	18.0002	9.8489
AC007285.6	0	0	0	0	0.0938553
AC007285.7	0.182978	0	0	0	0.172672
AC007292.1	0	0	0	0	0
AC007292.3	0	0	0	0	0
AC007292.4	0	0	0	0	0
AC007292.6	0.254109	2.41369	0.741856	0	0.119898
AC007292.7	0.339722	0	0	2.47499	0.320588
AC007308.6	0	0	0	0	0.447221
AC007308.7	0	5.51701	7.66585	2.22152	0
AC007312.3	0	0	0	0	0
AC007316.3	0	0	0	0	0
AC007317.1	0	0	0	0	0
AC007318.5	0	0	0	0	0
AC007319.1	0	0.524247	0.125323	0.938211	0
AC007322.1	0	0	0	0	0
AC007322.3	0	0	0	0	0
AC007322.5	0	0	0	0	0
AC007322.7	0	0	0	0	0
AC007326.9	0	0	0	0	0
AC007327.5	0	0	0	0	0
AC007327.6	0	0	0	0	0
AC007333.1	0	0	0	0	0
AC007339.1	0	0	0	0	0
AC007347.1	6.59708	11.266	8.31972	13.8301	12.1969
AC007349.4	0	0	0	0	0
AC007349.5	0	0	0	0	0
AC007349.7	0	0	0	0	0
AC007353.1	0	0	0	0	0
AC007358.1	0	0	0	0	0
AC007359.6	0	0	0	0	0
AC007362.1	0.954861	5.1828	2.44532	2.27001	1.42276
AC007362.3	0	0	0	0	0
AC007364.1	0.088047	0.0796502	0.0428414	0	0
AC007365.1	0	0	0	0	0
AC007365.2	0	0	0	0	0
AC007365.3	0	0	0	0	0
AC007365.4	0	0	0	0	0
AC007375.1	0	0	0	0	0
AC007377.1	0	0	0	0	0
AC007381.2	0	0.0821298	0	0	0
AC007381.3	0	0	0	0	0
AC007382.1	0	0	0	0	1.31535
AC007383.3	1.64999	1.40971	1.33807	0.40069	2.9411
AC007383.4	0.201522	0	0	0	0
AC007383.6	0	0	0	0	0
AC007386.2	0	0.117136	0.189011	0	0
AC007386.3	0	0	0	0	0
AC007386.4	0	0.519657	0	0	0
AC007387.2	0	0	0	0	0
AC007389.1	0	0	0	0	0
AC007389.2	0	0	0	0	0
AC007389.3	0	0	0	0	0.270061
AC007389.4	0	0	0	0	0
AC007390.4	0	0	0	0	0
AC007391.2	0	0	0	0	0.177469
AC007392.3	0	0	0	0	0
AC007392.4	0	0	0	0	0
AC007394.3	0	0	0	0	0
AC007395.3	0	0	0	0	0
AC007395.4	0	0	0	0	0
AC007401.1	0	0	0	0	0.0468049
AC007401.2	0	0	0	0	0.20801
AC007402.1	0	0	0	0	0
AC007403.1	0	0	0	0	0
AC007403.2	0	0	0	0	0
AC007403.3	0	0	0	0	0
AC007405.4	0.0467831	0.0846431	0	0	0.220741
AC007405.6	1.07819	3.99013	3.33848	0	0.554979
AC007405.8	0	0	0	0	0.107505
AC007421.1	0	0	0	0	0
AC007422.1	0	0	0	0	0
AC007435.1	0	0	0	0	0
AC007436.1	0	0	0	0	0
AC007450.1	0	0	0	0	0
AC007461.1	0	0	0	0	0
AC007461.2	0	0	0	0	0
AC007463.2	0	0	0	0	0
AC007486.1	0	0	0	0	0
AC007528.1	0	0	0	0	0
AC007535.1	0	0	0	0	0
AC007551.1	0	0	0	0	0
AC007551.2	0	0	0	0	0
AC007551.3	0.116987	0.148162	0	0	0.132477
AC007556.3	0	0	0	0	0
AC007557.1	0	0.218177	0.704103	0	0
AC007557.2	0	0	0	0	0
AC007557.3	0	0	0	0	0
AC007557.4	0	0	0	0	0
AC007559.1	0	0	0	0	0
AC007560.1	0	0	0	0	0
AC007560.2	0	0	0	0	0
AC007562.1	0	0	0	0	0
AC007563.1	0	0	0	0	0
AC007563.3	0	0	0	0	0
AC007563.4	0	0	0	0	0
AC007563.5	0	0	0	0	0
AC007566.10	0.135211	0.489264	0	1.18207	1.91393
AC007567.1	0	0	0	0	0
AC007568.1	0	0	0	0	0
AC007611.1	0	0	0	0	0
AC007618.3	0	0	0	0	0
AC007620.3	2.0021	2.29709	0.0950412	0	49.1689
AC007631.1	0	0	0	0	0
AC007652.1	0	0	0	0	0
AC007677.2	0	0	0	0	0
AC007679.1	0	0	0	0	0.178176
AC007679.3	0	0	0	0	0
AC007679.4	0	0	0	0	0
AC007680.2	0	0	0	0	0
AC007682.1	0	0	0	0	0
AC007682.2	0	0	0	0	0
AC007682.3	0	0	0	0	0
AC007690.1	0.0513727	0.0464734	0.0999864	0	1.30894
AC007731.1	0	0	0	0	0
AC007740.1	0	0	0	0	0
AC007742.3	0	0	0	0	0
AC007742.7	0	0	0	0	0
AC007743.1	0	0	0.0248418	0	0
AC007750.5	0	0.0445421	0	0	0
AC007773.1	0	0	0	0	0
AC007773.2	0.585078	1.3232	1.04384	1.56291	0.0920207
AC007773.3	0	0	0	0	0.162036
AC007787.2	0	0	0	0	0
AC007790.4	0	0	0	0	0
AC007795.1	0	0	0	0	0
AC007796.1	0	0	0	0	0
AC007842.1	0	0	0	0	0
AC007875.2	0	0	0	0	0
AC007875.3	0	0	0	0	0
AC007879.1	0	0	0	0	0
AC007879.2	0.0865594	0.548132	0	0	0
AC007879.3	0	0	0	0	0
AC007879.4	0	0	0	0	0
AC007879.5	0	0.0667784	0	0	0
AC007879.6	0	0	0	0	0
AC007879.7	0	0	0	0	0.148578
AC007880.1	0	0	0	0.768412	0.0904847
AC007881.1	0	0	0	0	0
AC007881.2	0	0	0	0	0
AC007881.4	0	0	0	0	0
AC007899.3	0	0	0	0	0
AC007919.1	0	0	0	0	0
AC007919.18	0	0	0	0	0
AC007919.19	0	0	0	0	0
AC007919.2	0	0	0	0	0
AC007948.1	0	0	0	0	0
AC007950.1	0	0.557681	0	0	0
AC007952.1	0	0	0	0	0
AC007952.4	0	0.779486	0.419261	2.51099	0
AC007952.5	0	0	0	1.61359	0
AC007952.6	0.0652772	0	0	0	0
AC007956.1	0	0	0	0	0
AC007965.1	0	0	0	0	0
AC007966.1	0	0.349498	0.187984	0	0
AC007967.2	0	0	0	0	0
AC007967.3	0	0	0	0	0
AC007967.4	0	0	0	0	0
AC007969.4	0	0	0	0	0
AC007969.5	0	0	0	0	0
AC007970.1	0	0	0	0	0.160967
AC008045.1	0	0	0	0	0
AC008060.5	0	0	0	0	0
AC008060.7	0	0	0	0	0
AC008060.8	0	0	0	0	0
AC008063.2	0	0	0	0	0
AC008063.3	0	0	0	0	0
AC008064.1	0	0	0	0	0
AC008065.1	0	0	0	0	0
AC008067.2	0	0	0	0	0
AC008069.1	0	0	0	0	0
AC008069.2	0	0	0	0	0
AC008072.1	0	0	0	0	0
AC008073.7	0	0	0	0	0
AC008073.9	0	0	0	0	0
AC008074.3	0.131096	0.237188	0	0	0
AC008074.4	0	0	0	0	0
AC008074.5	0	0	0	0	0
AC008079.9	0	0	0	0	0
AC008085.1	0	0	0	0	0
AC008088.4	0	0	0	0	0
AC008122.1	0	0	0	0	0
AC008132.1	0	0.0461234	0	0	0
AC008132.12	0	0	0	0	0
AC008132.13	0	0.0334543	0.011996	0	0.046531
AC008132.14	0	0	0	0	0
AC008147.1	0	0	0	0	0
AC008147.2	0	0	0	0	0
AC008154.4	0	0	0	0	0
AC008154.5	0	0	0	1.68935	0
AC008155.1	0	0	0	0	0
AC008155.2	0	0	0	0	0
AC008163.4	0	0	0	0	0
AC008163.6	0	0	0	0	0
AC008166.1	0	0	0	0	0
AC008171.1	0	0	0	0	0
AC008173.1	0	0	0	0	0
AC008174.3	0	0.68205	0.209631	0	0.101641
AC008175.1	0	0	0	0	0
AC008264.4	0	0	0	0	0
AC008265.2	0	0	0	0	0
AC008267.1	0	0	0	0	0.0766445
AC008268.1	0	0.15325	0	0	0
AC008268.2	0	0.0381931	0	0	0
AC008269.2	0	0	0	0	0
AC008271.1	0	0	0	0	0
AC008277.1	0	0	0	0	0.0642558
AC008278.2	0	0	0	0	0
AC008278.3	0	0	0	0	0
AC008280.1	0.230055	0	0	0	0
AC008280.3	0	0	0	0	0
AC008281.1	0	0	0	0	0
AC008372.1	0	0	0	0	0
AC008387.1	0	0	0	0	0
AC008391.1	0	0	0	0	0
AC008394.1	0	0	0	0	0
AC008397.1	0	0	0	0	0
AC008410.1	0	0	0	0	0
AC008427.2	0	0	0	0	0
AC008440.10	0	0	0	0	0
AC008440.5	0	0	0	0	0
AC008443.1	0	0	0	0	9.47848
AC008498.1	0	0	0	0	0
AC008536.1	0	0	0	0	0
AC008555.1	0	0	0	0	0
AC008555.2	0	0	0	0	0
AC008565.1	0	0	0	0	0
AC008581.1	0	0	0	0	0
AC008592.3	0	0	0	0	0.641944
AC008592.4	0.210628	0	0	1.8414	0
AC008592.5	0	0	0	0	0
AC008592.7	0	0	0	0	0.156645
AC008592.8	0	0	0	0	0
AC008625.1	0	0	0	0	0
AC008671.1	0	0	0	0	0
AC008674.1	0	0	0	0	0
AC008686.1	0	0	0	0	0
AC008691.1	0	0	0	0	0
AC008694.2	0	0	0	0	0
AC008694.3	0	0	0	0	0
AC008697.1	0	0	0	0	0
AC008703.1	0	0	0	0	0
AC008703.2	0	0	0	0	0
AC008706.1	0	0	0	0	0
AC008731.1	0	1.01188	0.687484	0	2.55555
AC008738.1	72.93	167.214	115.909	43.2904	133.354
AC008738.2	0	0	0	0	0
AC008746.10	0	0	0	0	0
AC008746.12	0	0	0	0	0
AC008746.3	0	0	0	0	0
AC008746.5	0	0	0	0	0
AC008746.9	0	0	0	0	0
AC008747.1	0	0	0	0	0
AC008752.1	0	0	0	0	0
AC008752.2	0	0	0	0	0
AC008752.3	0	0	0	0	0
AC008753.3	0	0	0	0	0
AC008753.4	0	0	0	0	0
AC008753.6	0	0	0	0	0
AC008780.1	0	0	0	0	0
AC008781.7	0	0	0	0	0.720162
AC008834.1	0	0	0	0	0
AC008834.2	0	0	0	0	0
AC008836.1	0	0	0	0	0
AC008850.3	0	0	0	0	0
AC008865.1	4.97316	12.1735	8.48357	10.3152	0
AC008869.1	0	0	0	0	0
AC008914.1	0	0	0	0	0
AC008937.2	0	0	0	0	0
AC008937.3	0	0	0	0	0.29358
AC008938.1	0	0	0	0	0
AC008940.1	0	0	0	0	0
AC008948.1	3.3509	2.2735	2.32923	0	0.62114
AC008949.1	0	0	0	0	0
AC008964.1	6.18251	24.0495	12.0793	4.98923	5.29574
AC008967.1	0	0	0	0	0
AC008982.2	0	0	0	0	2.35857
AC008984.2	0.0545354	0	0.318426	0	0
AC008984.5	0	0	0	0	0
AC008984.6	0	0	0	0	0
AC008984.7	0	0	0	0	0
AC008991.1	0	0	0	0	0
AC008992.1	0	0	0	0	0
AC009005.2	0	1.2105	0.868117	0	17.047
AC009009.1	0	0	0	0	0
AC009014.3	0	0	0	0	0
AC009035.1	0	0	0	0	0
AC009041.1	0	0	0	0	0
AC009041.2	0	0	0	0	0
AC009052.12	0	0	0	0	0
AC009060.1	0	0	0	0	0
AC009061.1	0	0	0	0	1.53289
AC009065.1	0	0	0	0	0
AC009065.2	0	0	0	0	0
AC009065.3	0	0	0	0	0
AC009080.1	0	0	0	0	0
AC009081.1	0	0	0	0	0
AC009093.1	0	0	0	0	0.141376
AC009095.4	0	0	0	0	0.171349
AC009107.1	0	0	0	0	0
AC009110.1	0	0	0	0	0
AC009120.10	0	0	0	0	0
AC009120.3	0	0	0	0	2.64739
AC009120.4	0	0.04847	0	0	0
AC009120.5	0	0	0	0	2.96404
AC009120.6	0.139694	0.379116	2.51495	1.93367	2.04331
AC009120.8	0	0	0	0	0
AC009121.1	0	0	0	0	0
AC009132.1	0	0	0	0	0
AC009133.12	0.75826	0.762164	0.409944	2.08691	2.22616
AC009133.14	0.243478	1.47888	3.89259	5.52419	5.80977
AC009133.15	0	0.156752	0	0	0
AC009133.17	0	0	0	0	0.486109
AC009133.20	0	0	0.3132	0	0
AC009133.21	0	0	0	0	0
AC009134.1	0	0	0	0	0
AC009142.1	0	0	0	0	0
AC009158.1	0	0	0	0	0
AC009159.1	0	0	0	0	0
AC009161.1	0	0	0	0	0
AC009166.5	1.36238	0.528194	0	2.26866	0
AC009196.1	0	0	0	0	0
AC009227.2	0	0	0	0	0
AC009227.3	0	0	0	0	0
AC009228.1	0	0	0	0	0
AC009229.5	0	0	0	0	0
AC009229.6	0	0	0	0	0
AC009234.1	0	0	0	0	0
AC009234.2	0	0	0	0	0
AC009236.2	0	0	0	0	0
AC009237.10	0	0	0	0	0
AC009237.11	0	0	0	0	0
AC009237.13	0	0	0	0	0
AC009237.14	0	0	0	0	0
AC009237.16	0	0	0	0	0
AC009237.17	0	0	0	0	0
AC009237.2	0	0	0	0	0
AC009237.4	0	0	0	0	0
AC009237.5	0	0	0	0	0
AC009237.6	0	0	0	0	0
AC009237.8	0.413155	1.0553	0.898724	0	0.0917376
AC009238.6	0	0	0.425058	0	0
AC009238.7	0	0	0	0	0
AC009238.8	0	0	0	0	0
AC009245.3	0	0	0	0	0
AC009262.2	0	0	0	0	0
AC009263.2	0.0764992	0	0	0	0
AC009274.6	0	0	0	0	0
AC009276.4	0	0	0	0	0
AC009297.1	0	0	0	0	0
AC009299.1	0	0	0	0	0
AC009299.2	0	0	0	0	0
AC009299.3	1.91399	0.324649	0.0388042	0.813406	0.338661
AC009299.4	0	0	0	0	0
AC009299.5	0	0	0	0	0
AC009302.2	0	0	0	0	0
AC009302.4	0	0	0	0	0
AC009303.1	0	0.0463478	0	0	0
AC009303.3	0	0	0	0	0
AC009305.1	0	0	0	0	0
AC009305.2	0	0	0	0	0
AC009310.1	0	0	0	0	0
AC009312.1	0	0	0	0	0
AC009313.1	0	0	0	0	0
AC009313.2	0	0	0	0	0
AC009336.1	0	0	0	0	0
AC009336.24	0	0.382442	0	0	0.558527
AC009362.2	0	0	0	0	0
AC009365.3	0	0	0	0	0
AC009365.4	0	0	0	0	0
AC009403.2	6.0823	8.55906	13.6465	5.00558	8.45016
AC009404.2	0.140142	0.211295	0.204568	1.15711	5.20178
AC009410.1	0	0.253679	1.36446	3.06445	0
AC009411.1	0	0	0	0	0
AC009411.2	0	0	0	0	0
AC009413.2	0	0	0	0	0
AC009414.1	0	0	0	0	0
AC009469.1	9.84081	15.8133	15.9399	52.6382	16.8624
AC009473.1	0	0.123907	0	0	0
AC009474.1	0	0	0	0	0
AC009474.2	0	0	0	0	0
AC009477.7	0	0	0	0	0
AC009478.1	0	0	0	0	0
AC009478.2	0	0	0	0	0
AC009480.1	0	0	0	0	0
AC009480.3	0	0	0	0	0
AC009480.4	0	0	0	0	0
AC009487.4	0	0	0	0	0
AC009487.5	0	0	0	0	0
AC009492.1	0	0	0	0	0
AC009494.3	0	0	0	0	0
AC009495.1	0	0	0	0	0
AC009495.2	0	0	0	0	0.803734
AC009495.3	0	0.169453	0	0	0
AC009495.4	0	0	0	0	0.480882
AC009498.1	0	0	0	0	0
AC009499.1	0	0	0	0	0
AC009499.2	0	0	0	0	0
AC009500.2	0	0	0	0	0
AC009501.4	0.0815685	0	0	8.26013	1.00067
AC009502.1	0	0	0	0	0
AC009502.4	0	0	0	0	0
AC009505.2	0	0	0	0	0
AC009505.4	0	0	0	0	0
AC009506.1	1.39573	1.60697	2.34607	1.94123	2.63423
AC009506.2	0	0	0	0	0
AC009508.1	0	0	0	0	0
AC009517.2	0	0	0	0	0
AC009518.2	0	0	0	0	0
AC009518.3	0	0	0	0	0
AC009518.4	0	0	0	0	0
AC009518.8	0	0	0	0	0
AC009531.2	0	0	0	0	0
AC009541.1	0	0	0	0	0
AC009542.2	0	0	0	0	0
AC009677.1	0	0	0	0	0
AC009695.1	0	0	0	0	0
AC009779.1	0	0	0	0	0
AC009784.1	0	0	0	0	0
AC009784.3	0	0	0	0	0
AC009784.4	0	0	0	0	0
AC009800.1	0	0	0	0	0
AC009802.1	0	0	0	0	0
AC009831.1	0	0	0	0	0
AC009835.1	0	0	0	0	0
AC009878.2	0	0	0	0	0
AC009892.1	0	0	0	0	0
AC009892.10	0	0	0	0	0
AC009892.2	0	0	0	0	0
AC009892.5	0	0	0	0	0
AC009892.9	0	0	0	0	0
AC009941.1	0	0	0	0	0
AC009945.4	0	0	0	0	0
AC009947.2	0	0	0	0	0
AC009947.3	0	0	0	0	0
AC009947.5	0	0	0	0	0
AC009948.5	0.355346	0.985803	1.01436	1.03553	11.5578
AC009948.7	0	0	0	0	0
AC009950.2	0.110426	0.166492	0	0.214531	0.521034
AC009951.1	0	0.0578176	0	0	0.0301565
AC009951.2	0	0	0	0	0
AC009955.8	0	0	0	0	0
AC009960.1	0	0	0	0	0
AC009960.2	0	0	0	0	0
AC009960.3	0	0	0	0	0
AC009960.4	0	0	0	0	0
AC009960.5	0	0	0	0	0
AC009960.6	0	0	0	0	0
AC009960.7	0	0	0	0	0
AC009961.2	0	0	0	0	0.11692
AC009961.3	0.0695907	0.31477	0.744943	0	0.361191
AC009961.5	0	0	0	0	0
AC009963.3	0	0	0	0	0
AC009963.4	0	0	0	0	0
AC009963.5	0	0	0	0	0
AC009963.6	0	0	0	0	0
AC009965.1	0	0	0	0	0
AC009965.2	0	0	0	0	0
AC009967.3	0	0	0	0	0
AC009969.1	0	0	0	0	0
AC009970.1	0	0	0	0	0.207047
AC009974.11	0	0	0	0	0
AC009977.1	0	0	0	0	0
AC009987.1	0	0	0	0	0
AC009994.2	0	0	0	0	0
AC009997.1	0	0	0	0	0
AC010082.2	0	0	0	0	0
AC010084.1	0	0	0	0	0
AC010086.1	0	0	0	0	0
AC010086.5	0	0	0	0	0
AC010090.1	0	0	0	0	0
AC010091.1	0.0201151	0	0	0	0
AC010091.4	0	0	0	0	0
AC010092.1	0	0	0	0	0
AC010095.5	0	0	0	0	0
AC010095.6	0	0	0	0	0
AC010095.7	0	0	0	0	0
AC010096.1	0	0	0	0	0
AC010096.2	0.125706	0	0	0	0
AC010105.1	0	0	0	0	0
AC010127.3	0	0.0893394	0.0961057	0	0
AC010132.10	0	0	0	0	0
AC010132.11	0	0	0	0	0
AC010136.2	0	0	0	0	0
AC010139.1	0	0	0	0	0
AC010141.1	0	0	0	0	0
AC010141.4	0	0	0	0	0
AC010141.6	0	0	0	0	0
AC010141.8	0	0	0	0	0
AC010145.4	0	0	0	0	0
AC010146.1	0	0	0	0	0
AC010146.2	0	0	0	0	0
AC010148.1	0	0.0576814	0.0310251	0	0
AC010149.4	0	0	0	0	0
AC010150.1	0	0	0	0	0
AC010150.2	0	0	0	0	0
AC010153.3	0	0	0	0	0
AC010154.2	0	0	0	0	0
AC010170.1	0	0	0	0	0
AC010196.1	0	0	0	0	0
AC010203.1	0	0	0	0	0
AC010207.1	0	0	0	0	0
AC010209.1	0	0	0	0	0
AC010226.4	1.01164	0.422382	0	0.453546	0.220306
AC010235.1	0	0	0	0	0
AC010240.2	0	0	0	0	0.148455
AC010240.3	0	0	0	0	0
AC010243.1	0	0	0	0	0
AC010247.1	0	0	0	0	0
AC010295.1	0	0	0	0	0
AC010296.1	0	0	0	0	0
AC010297.1	0	0	0	0	0
AC010311.1	0	0	0	0	0
AC010319.1	0	0	0	0	0
AC010323.1	0	0	0	0	0
AC010327.1	0	0	0	0	0
AC010327.2	0.216752	0.840348	2.92291	3.51916	9.08759
AC010329.1	0	0	0	0	0
AC010335.1	2.35716	6.17263	2.53532	4.51913	1.52196
AC010336.1	0.0400011	0.144745	0.253025	0	0.0943703
AC010368.1	0	0	0	0	0
AC010368.2	0	0	0	0	0
AC010376.1	0	0	0	0	0
AC010422.1	0	0	0	0	0
AC010423.1	0	0	0	0	0
AC010441.1	2.7849	6.51546	4.85952	0.0699618	14.4996
AC010455.1	0	0	0	0	0
AC010458.1	0	0	0	0	0
AC010468.1	0	0	0	0	0
AC010468.2	0	0	0	0	0
AC010468.3	0	0	0	0	0
AC010492.2	0.105197	0.0951648	0	0	0.397088
AC010492.4	0	0	0	0	0
AC010492.5	0	0	0	0	0
AC010504.2	0	0.43971	0.630684	0	0
AC010518.3	0	0	0	0	0
AC010522.1	0	0	0	0	0
AC010524.2	0.0580953	0	0	0	0.0274116
AC010524.4	0	0	0	0	0
AC010525.1	0	0	0	0	0.535594
AC010525.2	0	0	0	0	0
AC010525.4	0	0	0	0	0
AC010525.5	0	0	0	0	0
AC010525.6	0	0	0	0	0.333125
AC010525.7	0	0	0	0	0
AC010528.1	0	0	0	0	0
AC010536.1	0.0726303	0.361371	0.28272	0.370396	0.651126
AC010543.1	0	0	0	0	0
AC010546.1	0	0	0	0	0
AC010547.9	0	0	0	0	0.559482
AC010595.1	0	0	0	0	0
AC010609.1	0	0	0	0	0
AC010620.1	0	0	0	0	0
AC010641.1	0	0	0	0	0
AC010642.1	0.179385	0.101424	0	0	1.77746
AC010642.2	0	0	0	0	0
AC010646.3	0	0	0	0	0
AC010649.1	0	0	0	0	0
AC010677.5	0	0	0	0	0
AC010723.1	0	0	0	0	0
AC010723.2	0	0	0	0	0
AC010724.1	0	0	0	0	0
AC010729.1	0	0	0	0	0
AC010729.2	0	0	0	0	0
AC010729.3	0	0	0	0	0
AC010731.2	0	0	0	0	0
AC010731.3	0	0	0	0	0
AC010731.4	0	0	0	0	0
AC010731.6	0	0	0	0	0
AC010733.4	0	0	0	0	0
AC010733.5	0	0	0	0	0
AC010733.7	0	0	0	0	0
AC010739.1	0	0	0	0	0
AC010740.1	0	0	0	0	0
AC010744.1	0	0	0	0	0
AC010745.1	0	0	0	0	0
AC010745.2	0	0	0	0	0
AC010745.3	0	0	0	0	0
AC010745.4	0	0	0	0	0
AC010746.3	0	0	0	0	0.197885
AC010747.2	0	0	0	0	0
AC010754.1	0	0	0	0	0
AC010760.1	0	0	0	0	0
AC010761.10	0	0	13.1768	28.8721	9.97286
AC010761.13	0	0	0	0	2.15096
AC010761.14	0	0	0	0	0
AC010761.6	0.125706	0	0	0	0.593131
AC010761.8	0.210862	1.33527	1.6416	0	34.922
AC010761.9	0	0.493724	0	0	2.23181
AC010874.1	0	0	0	0	0
AC010877.1	0	0	0	0	0
AC010878.3	0	0	0	0	0
AC010880.1	0	0	0	0	0
AC010883.5	1.66703	1.50805	0.463505	7.28693	0.449468
AC010884.1	0	0	0	0	0
AC010884.2	0	0	0	0	0
AC010886.2	0	0	0	0	0
AC010887.1	0	0	0	0	0
AC010890.1	0.234031	0.105856	0	0	0
AC010891.2	0	0	0	0	0
AC010894.3	1.55774	3.03517	9.79513	9.42813	0.452309
AC010894.4	0	0	0	0	0
AC010894.5	0	0	0	0	0
AC010900.2	0	0	0	0	0
AC010904.1	0	0	0	0	0
AC010907.2	0	0.247456	0.399296	0	0
AC010907.5	0	0	0	5.134	0
AC010928.1	0	0	0	0	0
AC010930.1	0	0	0	0	0
AC010967.1	0	0	0	0	0
AC010967.2	0	0	0	0	0
AC010967.3	0	0	0	0	0
AC010969.1	0.0785925	0.0355487	0	0.171772	0
AC010970.1	0	0	0	0	0
AC010970.2	0	0	0	0	0
AC010971.1	0	0	0	0	0
AC010974.3	0	0	0	0	0
AC010975.1	0	0	0	0	0
AC010975.2	0	0	0	0	0
AC010976.2	0.0444154	0.0803594	0	0	0.293397
AC010980.2	0	0	0.323388	0	0.522658
AC010982.1	0	0	0	0	0.105976
AC010982.2	0	0	0	0	0
AC010983.1	0	0	0	0	0
AC010987.5	0	0	0	0	0
AC010987.6	0	0	0	0	0
AC010999.1	0	0	0	0	0
AC011073.1	0	0	0	0	0
AC011193.1	0	0	0	0	0
AC011196.3	0	0	0	0	0
AC011225.1	0	0	0	0	0
AC011233.2	0	0	0	0	0
AC011239.1	0	0	0	0	0
AC011242.5	0	0	0	0	0
AC011242.6	0	0	0	0	0
AC011243.1	0	0	0	0	0
AC011247.3	0	0	0	0	0
AC011284.3	0	0	0	0	0
AC011286.1	0	0	0	0	0
AC011288.2	0	0	0	0	0
AC011290.4	0	0	0	0	0
AC011290.5	0	0	0	0	0
AC011293.1	0	0	0	0	0
AC011294.3	0	3.68657	5.55209	0	0
AC011298.1	0	0	0	0	0
AC011298.2	0	0	0	0	0
AC011306.1	0	0	0	0	0
AC011306.2	0	0	0	0	0
AC011308.1	0	0	0	0	0
AC011313.1	0	0	0	0	0
AC011322.1	0	0	0.337866	0	0
AC011330.5	0	0	0	0	4.09203
AC011343.1	0.0169043	0.0152922	0	0	0
AC011357.1	0	0	0	0	0
AC011363.1	0	0	0	0	0
AC011366.3	0	0	0	0	0
AC011379.1	0	0	0	0	0
AC011385.1	0	0.125816	0	0	0.262492
AC011385.2	0	0	0	0	0
AC011406.2	0	0	0	0	0
AC011407.1	0	0	0	0	0
AC011410.1	0	0	0	0	0
AC011416.1	0	0	0	0	0
AC011431.1	0	0	0	0	0
AC011431.2	0	0	0	0	0
AC011450.1	0	0	0	0	0
AC011453.1	0	0	0	0	0
AC011456.1	0	0	0	0	0
AC011465.1	0	0	0	0	0
AC011467.1	0	0	0	0	0
AC011475.1	0	0	0	0	0
AC011477.1	0	0	0	0	0
AC011478.1	0	0	0	0	0
AC011484.1	0	0.0861311	0	0	0.269545
AC011495.1	0	0	0	0	0
AC011498.1	0	0	0	0	0
AC011499.1	0	0	0	0	0
AC011500.1	0	0	0	0	0
AC011513.4	0	0	0	0	0.15775
AC011515.2	0	0.148089	0	0	0
AC011516.1	0	0	0	0	0
AC011516.2	0	0	0	0	0
AC011518.1	0	0	0	0	0
AC011518.2	0	0	0	0	0
AC011523.2	0	0	0	0	0
AC011524.1	0	0.159671	0	0	0
AC011524.2	0	0	0	0	0
AC011524.3	0	0	0	0	0
AC011525.2	0	0	0	0	0
AC011525.4	0	0	0	0	0
AC011526.1	1.39099	1.67778	0.712442	3.87575	0.276346
AC011530.4	0	0	0	0.160774	0.312378
AC011551.3	0.112169	0.202943	0	1.79781	0
AC011558.5	0	0	0	0	0
AC011591.1	0	0	0	0	0
AC011625.1	0	0	0	0	0
AC011626.1	0	0	0	0	0
AC011648.1	0	0	0	0	0
AC011652.1	0	0	0	0	0
AC011652.2	0	0	0	0	0
AC011718.1	0	0	0	2.49087	0
AC011718.2	0	0	0.0783666	0	0
AC011718.3	0	0	0	0	0
AC011737.2	1.18775	0	2.77406	10.0377	6.05261
AC011738.1	0	0	0	0	0
AC011738.4	0	0	0	0	0
AC011742.3	0	0	0	0	0
AC011742.5	0	0	0	0	0
AC011747.3	0	0	0	0	0.086336
AC011747.4	0.116414	0.0287216	0	0	0.0898836
AC011747.6	0.167757	0.151758	0	0	0
AC011747.7	0.046011	0	0	1.4749	0.086839
AC011748.1	0	0	0	0	0
AC011752.1	0	0	0	0	0
AC011753.5	0	0	0	0	0
AC011753.6	0	0	0	0	0
AC011754.1	0	0	0	0	0
AC011755.1	0	0	0	0	0
AC011816.1	0	0	0	0	0
AC011891.5	0	0	0	0	0
AC011893.3	0	0.0920982	0	0.59336	0
AC011897.1	0.0462805	0	0	0.134868	0
AC011897.2	0	0	0	0	0
AC011899.10	0	0	0	0	0
AC011899.9	0.0609926	0.809248	0.514409	0.148117	0
AC011901.2	0	0	0	0	0
AC011933.1	18.7141	131.391	124.31	25.3909	2.07345
AC011933.2	0	0	0	0	0
AC011994.1	0	0	0	0	0
AC011995.1	0	0	0	0	0
AC011995.3	0	0	0	0	0
AC011997.1	0	0.249254	0.0893774	0	0
AC011998.1	0	0	0	0	0
AC011998.2	0	0	0	0	0
AC011998.4	0	0	0	0	0
AC011999.1	0	0	0	0	0
AC012003.1	0	0	0	0	0
AC012005.2	0	0	0	0	0
AC012047.1	0	0	0	0	0
AC012050.1	0	0	0	0	0
AC012065.4	0	0	0	0	0
AC012065.5	0	0	0	0	0
AC012065.7	0	0	0	0	0
AC012066.1	0	0	0	0	0
AC012067.1	0	0	0	0	0
AC012074.1	0	0	0	0	0
AC012074.2	0	0	0	0	0
AC012075.1	0	0	0	0	0
AC012075.2	0	0	0	0	0
AC012078.2	0	0	0	0	0
AC012119.1	0	0	0	0	0
AC012123.1	0	0.516216	0.222125	0	0
AC012146.7	1.66091	30.2506	34.8046	5.80814	0
AC012150.1	0	0	0	0	0
AC012175.1	0	0	0	0	0
AC012181.1	0	0	0	0	0
AC012215.1	0	0.0639877	0	0	0.244748
AC012305.1	0	0	0	0	0
AC012306.2	0	0	0	0	0
AC012307.2	0	0	0	0	0
AC012309.5	0	1.37221	2.44617	0	0
AC012313.1	0	0	0	0	0
AC012314.19	0	0	0	0	0
AC012314.20	0	0	0	0	0
AC012314.8	0.0227952	0.164971	0.0221831	0	1.03254
AC012317.1	0	0	0	0	0
AC012322.1	0	0	0	0	0
AC012353.1	0	0	0	0	0
AC012354.6	0	0	0.274823	0	0.0333125
AC012354.8	0	0	0	0	0
AC012358.4	0.132193	0.17938	0.0643218	0	1.30985
AC012358.7	0	0	0	0	0.781171
AC012358.8	0.626454	0.311691	0.457225	1.64302	0.118234
AC012360.1	0	0	0	0	0
AC012360.2	0	0	0	0	0
AC012360.4	0	0.381647	0	0	0
AC012360.6	0	0.0328645	0	0	0
AC012361.1	0	0	0	0	0
AC012362.1	0	0	0	0	0
AC012362.3	0	0	0	0	0
AC012363.10	0	0	0	0	0
AC012363.13	0	0	0	0	0
AC012363.4	0	0	0	0	0
AC012363.7	0	0	0	0	0
AC012363.8	0	0	0.598168	0	0.232021
AC012365.3	0	0	0	0	0
AC012368.1	0	0	0	0	0
AC012370.2	0	0	0	0	0
AC012370.3	0	0	0	0	0.0813868
AC012379.1	0.543686	0	0	0	1.19715
AC012391.1	0	0	0	0	0
AC012414.1	0	0	0	0	0
AC012441.1	0	0	0	0	0
AC012442.5	0	0.201749	0	0	0
AC012442.6	0.358346	0.81043	1.91798	2.34961	0
AC012445.1	0	0	0	0	0
AC012451.1	0	0	0	0	0
AC012454.4	0	0	0	0	0
AC012456.3	0	0	0	0	0
AC012456.4	0	0	0	0	0
AC012457.2	0	0	0	0	0
AC012462.1	0	0	0	0	0
AC012462.2	0	0	0	0	0
AC012462.3	0	0	0	0	0
AC012467.1	0	0	0	0	0
AC012485.1	0	0	0	0	0
AC012485.2	0	0.152297	0	0	0
AC012487.2	0	0.107313	0.346323	0	0
AC012493.1	0	0	0	0	0
AC012493.2	0	0	0	0	0
AC012494.1	0	0	0	0	0
AC012497.2	0	0	0	0	0
AC012499.1	0	0	0	0	0
AC012501.1	0	0	0	0	0
AC012501.2	0	0	0	0	0
AC012501.3	0	0	0	0	0
AC012506.1	0	0	0	0	0
AC012506.2	0	0	0	0	0
AC012506.3	0	0	0	0	0
AC012506.4	0	0	0	0	0
AC012507.3	0	0	0	0	0
AC012507.4	0	0	0	0	0
AC012512.1	0	0	0	0	0
AC012513.4	0	0	0	0	0
AC012513.6	0	0	0	0	0
AC012531.23	0	0	0	0	0
AC012531.25	0	0	0	0	0
AC012564.1	0	0	0	0	0
AC012593.1	0	0	0	0	0
AC012594.1	0	0	0	0	0
AC012603.1	0	0	0	0	0
AC012613.2	0.0209095	0	0	0	0.0197318
AC012615.1	11.3877	39.4378	41.3054	33.6881	16.9336
AC012627.1	0	0	0	0	0
AC012667.1	0	0	0	0	0
AC012668.1	0	0	0	0	0
AC012668.2	0.233685	0.169119	0.181928	0	0
AC012668.3	0	0	0	0	0
AC012671.1	0	0	0	0	0
AC012671.2	0	0	0	0	0
AC012671.3	0	0	0	0	0
AC012671.4	0	0	0	0	0
AC013248.2	0	0	0	0	0
AC013262.1	0	0	0	0	0
AC013264.2	0	0.942236	0	0	0
AC013267.1	0	0	0	0	0
AC013268.1	0	0	0	0	0
AC013268.3	0	0	0	0	0
AC013268.4	0	0	0	0	0
AC013269.1	0	0	0	0	0
AC013269.3	0	0	0	0	0
AC013269.4	0	0	0	0	0
AC013269.5	0	0	0	0	0
AC013271.3	1.00446	0	0.270369	1.93066	1.45208
AC013275.1	0	0	0	0	0
AC013275.2	0	0.0820904	0.176616	0	0
AC013283.1	0	0	0	0	0
AC013394.2	12.1921	18.0604	18.3062	24.6093	18.0541
AC013399.3	0	0	0	0	0
AC013401.1	0	0	0	0	0
AC013401.2	0	0.410911	0	0	0
AC013402.1	0	0	0	0	0
AC013402.3	0	0	0	0	0
AC013402.4	0	0	0	0	0
AC013402.5	0	0	0	0	0
AC013403.13	0	0	0	0	0
AC013404.1	0	0	0	0	0
AC013406.1	0	0	0	0	0
AC013410.1	0	0	0	0	0
AC013410.2	0	0	0	0	0
AC013429.4	0	0	0	0	0
AC013429.5	0	0	0	0	0
AC013436.6	0	0	0	0	0
AC013437.2	0	0	0	0	0
AC013437.4	0	0	0	0	0
AC013437.6	0	0	0	0	0
AC013437.7	0	0	0	0	0
AC013439.4	0	0.138408	0.0744451	0	0
AC013442.1	0	0	0	0	0
AC013444.1	0	0	0	0	0
AC013444.2	0	0	0	0	0
AC013448.1	0	0	0	0	0
AC013448.2	0	0	0	0	0
AC013449.1	0	0	0	0	0
AC013460.1	0	0.0264722	0	0	0
AC013463.2	0	0	0	0	0
AC013467.1	0	0	0	0	0
AC013468.1	0	0	0	0	0
AC013469.1	0	0	0	0	0
AC013470.6	0	0	0	0	0
AC013470.8	0	0	0	0	0
AC013472.3	0	0	0	0	0
AC013472.4	0	0	0	0	0
AC013474.4	0	0	0	0	0
AC013476.1	0	0	0	0	0
AC013477.1	0	0	0	0	0
AC013480.2	0	0	0	0	0
AC013489.1	0	0	0	0	0
AC013558.1	0	0	0	0	0
AC013717.3	0	0	0	0	0
AC013718.1	0	0	0.678217	0	0
AC013727.1	0	0	0	0	0
AC013727.2	0	0	0	0	0
AC013731.1	0	0	0	0	0
AC013733.3	0	0	0	0	0
AC013733.4	0	0	0	0	0
AC013733.5	0	0	0	0	0
AC013737.1	0	0	0	0	0
AC013751.1	0	0	0	0	0
AC015600.1	0	0	0	0	0
AC015660.1	0	0	0	0	0
AC015688.3	0	0	3.03247	0.945922	0.245052
AC015691.13	0	0	0	0	0
AC015726.1	0	0	0	0	0
AC015815.1	0	0	0	0	0
AC015815.2	0	0	0	0	0
AC015815.3	0	0	0	0	0
AC015815.4	0	0	0	0	0
AC015815.5	0	0	0	0	0
AC015815.6	0	0	0	0	0
AC015815.7	0	0	0	0	0
AC015815.8	0	0	0	0	0
AC015818.3	0	0	0.105414	0	0
AC015818.6	0	0	0	0	0
AC015820.1	0	0	0	0	0
AC015849.12	0	0	0	0	0
AC015849.13	0	0	0	0	0
AC015849.14	0	0	0	0	0
AC015849.16	0.0164868	0.029829	0	0	0
AC015849.19	0	0.351408	0	0	7.33149
AC015849.2	0	0	0	0	0.270224
AC015871.1	0	0	0	0	0
AC015884.1	0	0	0	0	0
AC015922.5	0	0.062678	0	0	0
AC015922.6	0	1.6229	0.48495	0	0
AC015922.7	0	0	0	0	0
AC015923.1	0	0	0	0	0
AC015933.2	0	0.584615	0	0	0
AC015936.3	0	0.340252	2.01312	0	0
AC015969.3	0	0	0	0	0
AC015971.1	0	0	0	0	0
AC015971.2	0.0662815	0	0	0	0.594209
AC015977.5	0	0	0	0	0
AC015977.6	0	0	0	0	0
AC015987.1	0	0.106646	0.688339	0	0
AC015987.2	25.0978	55.4539	31.922	1.32079	9.08876
AC015989.1	0	0	0	0	0
AC015989.2	0	0	0	0	0
AC016113.1	0	0	0	0	0
AC016178.1	0	0	0	0	0
AC016178.2	0	0	0	0	0
AC016194.1	0	0	0	0	0
AC016251.1	0	0	0	0	0
AC016292.1	0	0	0	0	0
AC016292.3	0	0	0	0	0
AC016405.1	0	0	0	0	0
AC016405.2	0	0	0	0	0
AC016543.1	0	0	0	0	0
AC016553.1	0	0	0	0	0
AC016559.1	0	0	0	0	0
AC016561.1	0	0	0	0	0
AC016575.1	0	0	0	0	0
AC016582.2	0	0	0.168624	0	0
AC016586.1	0.046737	0.0845596	0	0	0.0882092
AC016597.1	0	0	0	0	0
AC016626.1	0	0	0	0	0
AC016626.2	0	0	0	0	0
AC016629.3	0.0846273	0	0	0	0.399304
AC016629.7	0	0	0	0	0
AC016629.8	0.415153	0.491118	0.279696	0.232656	1.68763
AC016644.1	0	0	0	0	0
AC016670.1	0	0	0	0	0
AC016682.1	0	0	0	0	0
AC016683.5	0	0	0	0	0.166563
AC016691.2	0	0	0	0	0
AC016694.2	0	0	0	0	0
AC016696.1	0	0	0	0	0
AC016697.1	0	0	0	0	0
AC016697.2	0	0	0	0	0
AC016697.3	0	0	0	0	0
AC016700.2	0	0	0	0	0
AC016700.3	0	0.179005	0.481406	0	0.0933655
AC016700.4	0	0	0	0	0
AC016700.5	2.57717	7.77131	6.40925	6.88437	3.64802
AC016700.6	0	0	0	0	0
AC016706.1	0	0	0	0	0
AC016708.2	0	0	0	0	0
AC016710.1	0	0.919994	0.593804	0	0.575821
AC016712.1	0	0	0	0	0
AC016712.2	0	0	0	0	0
AC016716.1	0	0	0	0	0
AC016716.2	0	0	0	0	0
AC016717.1	0	0	0	0	0
[truncated: 55,774 more rows]
